# Supplementary material for: Nucleotide-level linkage of transcriptional elongation and polyadenylation
Source: eLife journal article supplement (doi:10.7554/elife.83153), 2022-11-24
Supplement: supp [file elife-83153-supp-v1.zip]

### WT Pol II Biological Replicate Correlation

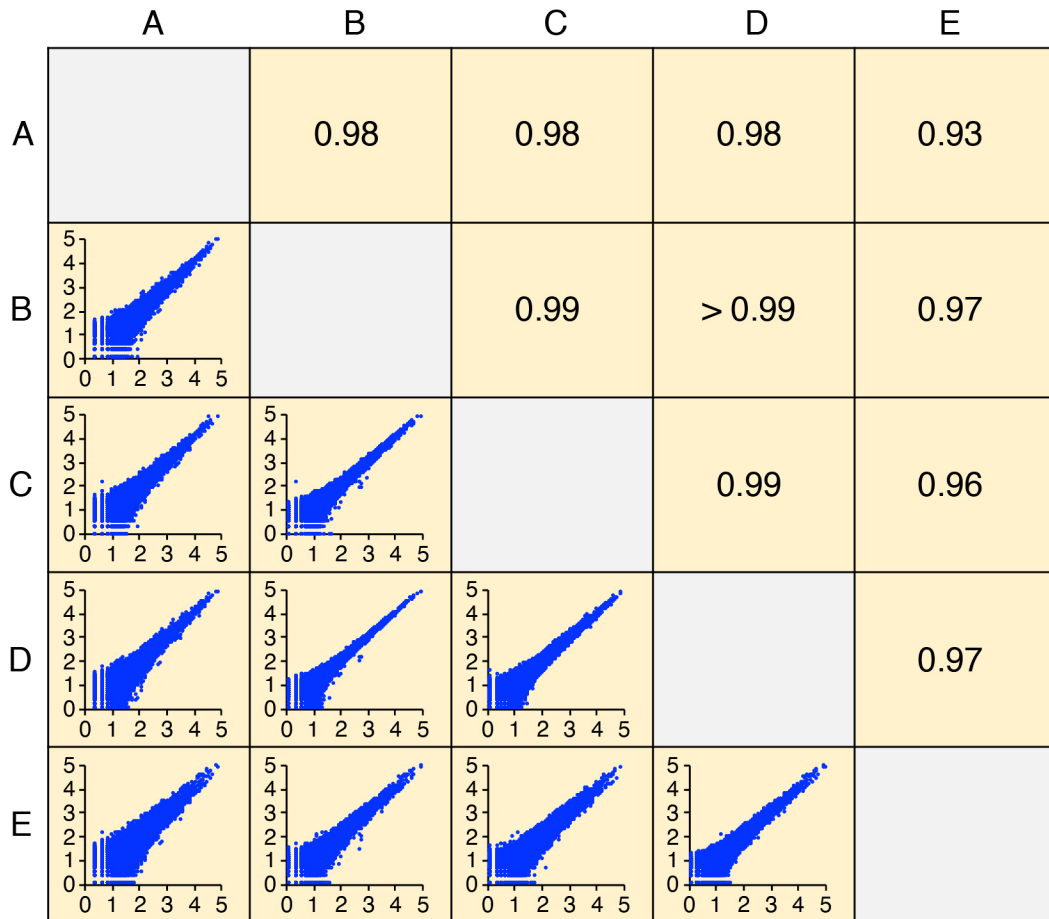

### R749H Pol II Biological Replicate Correlation

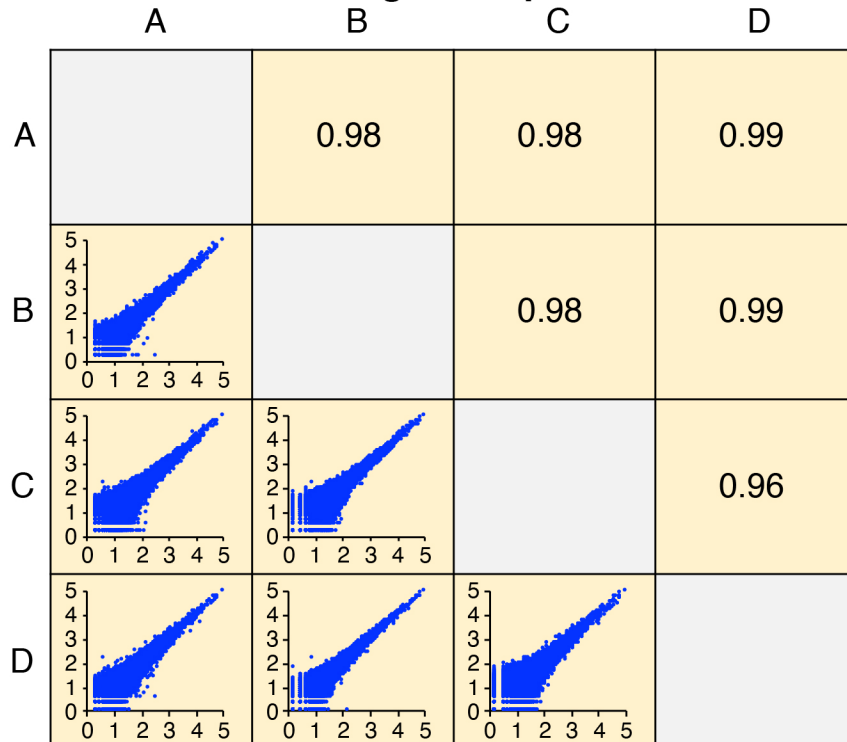

Figure 4 - figure supplement 1
