# Supplementary material for: Nucleotide-level linkage of transcriptional elongation and polyadenylation
Source: eLife journal article supplement (doi:10.7554/elife.83153), 2022-11-24
Supplement: supp [file elife-83153-supp-v1.zip]

**WT Pol II at poly(A) sites**

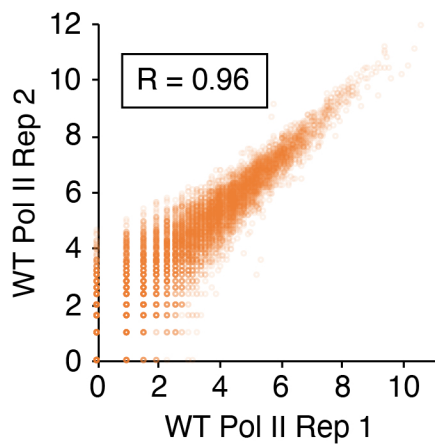

**R749H Pol II at poly(A) sites**

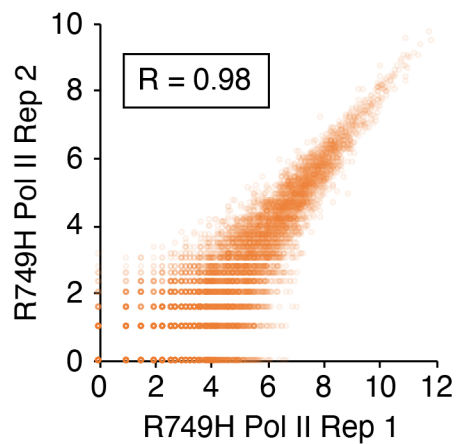

**WT Pol II at decoy sites**

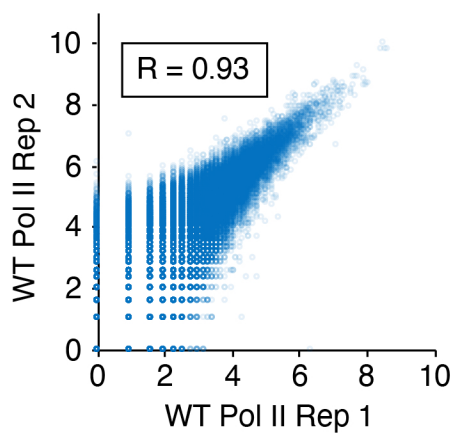

**R749H Pol II at decoy sites**

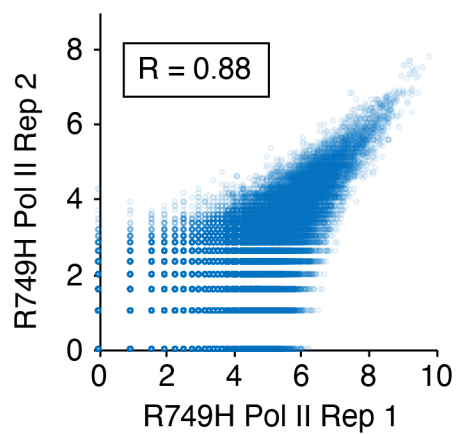

**Figure 7 - figure supplement 1**
