# Supplementary material for: Nucleotide-level linkage of transcriptional elongation and polyadenylation
Source: eLife. 2022 Nov 24;11:e83153. doi: 10.7554/eLife.83153 (PMC9721619; doi:10.7554/eLife.83153)
Supplement: Supplementary file 1. [file elife-83153-supp1.xlsx]

## Sheet: Sheet2
chromosome	Feature Name	Standard Gene Name	Major end zone span	Number of major isoforms	number of isoforms/cluster --->	1	2	3	4	5	6	7	8	9	10+
chrI	YAL062W	GDH3	388	18		4	0	0	0	0	0	0	0	0	1
chrI	YAL061W	BDH2	226	11		2	1	1	1	0	0	0	0	0	0
chrI	YAL060W	BDH1	112	3		1	1	0	0	0	0	0	0	0	0
chrI	YAL058W	CNE1	191	13		3	1	1	0	1	0	0	0	0	0
chrI	YAL053W	FLC2	76	7		0	0	1	1	0	0	0	0	0	0
chrI	YAL049C	AIM2	136	10		4	3	0	0	0	0	0	0	0	0
chrI	YAL047C	SPC72	54	4		0	0	0	1	0	0	0	0	0	0
chrI	YAL046C	AIM1	117	4		1	0	1	0	0	0	0	0	0	0
chrI	YAL044W-A		161	6		1	1	1	0	0	0	0	0	0	0
chrI	YAL044C	GCV3	170	8		2	0	0	0	0	1	0	0	0	0
chrI	YAL043C	PTA1	196	8		4	0	0	1	0	0	0	0	0	0
chrI	YAL042W	ERV46	116	7		2	1	1	0	0	0	0	0	0	0
chrI	YAL039C	CYC3	72	6		0	0	0	0	0	1	0	0	0	0
chrI	YAL038W	CDC19	159	11		5	1	0	1	0	0	0	0	0	0
chrI	YAL036C	RBG1	193	5		2	0	1	0	0	0	0	0	0	0
chrI	YAL035W	FUN12	126	4		4	0	0	0	0	0	0	0	0	0
chrI	YAL034C	FUN19	147	12		4	1	0	0	0	1	0	0	0	0
chrI	YAL033W	POP5	166	17		4	3	1	1	0	0	0	0	0	0
chrI	YAL030W	SNC1	181	16		3	2	3	0	0	0	0	0	0	0
chrI	YAL029C	MYO4	171	15		3	3	0	0	0	1	0	0	0	0
chrI	YAL026C	DRS2	159	3		3	0	0	0	0	0	0	0	0	0
chrI	YAL025C	MAK16	242	10		3	2	1	0	0	0	0	0	0	0
chrI	YAL023C	PMT2	146	9		3	1	0	1	0	0	0	0	0	0
chrI	YAL022C	FUN26	50	5		2	0	1	0	0	0	0	0	0	0
chrI	YAL021C	CCR4	309	21		10	2	1	1	0	0	0	0	0	0
chrI	YAL020C	ATS1	83	6		4	1	0	0	0	0	0	0	0	0
chrI	YAL016W	TPD3	94	6		0	0	0	0	0	1	0	0	0	0
chrI	YAL015C	NTG1	147	3		1	1	0	0	0	0	0	0	0	0
chrI	YAL014C	SYN8	54	6		0	0	0	0	0	1	0	0	0	0
chrI	YAL013W	DEP1	106	7		2	1	1	0	0	0	0	0	0	0
chrI	YAL012W	CYS3	103	3		1	1	0	0	0	0	0	0	0	0
chrI	YAL010C	MDM10	193	17		10	2	1	0	0	0	0	0	0	0
chrI	YAL009W	SPO7	129	10		4	0	2	0	0	0	0	0	0	0
chrI	YAL008W	FUN14	195	11		5	0	2	0	0	0	0	0	0	0
chrI	YAL007C	ERP2	176	6		4	1	0	0	0	0	0	0	0	0
chrI	YAL005C	SSA1	171	6		2	0	0	1	0	0	0	0	0	0
chrI	YAL003W	EFB1	231	6		2	0	0	1	0	0	0	0	0	0
chrI	YAL002W	VPS8	113	5		3	1	0	0	0	0	0	0	0	0
chrI	YAL001C	TFC3	82	12		3	1	1	1	0	0	0	0	0	0
chrI	YAR002W	NUP60	105	16		2	0	0	1	0	0	0	0	0	1
chrI	YAR002C-A	ERP1	233	8		4	2	0	0	0	0	0	0	0	0
chrI	YAR008W	SEN34	123	9		2	0	1	1	0	0	0	0	0	0
chrI	YAR014C	BUD14	206	12		7	1	1	0	0	0	0	0	0	0
chrI	YAR015W	ADE1	199	9		6	0	1	0	0	0	0	0	0	0
chrI	YAR018C	KIN3	231	15		7	1	2	0	0	0	0	0	0	0
chrI	YAR027W	UIP3	206	16		2	5	0	1	0	0	0	0	0	0
chrI	YAR028W		199	5		1	0	0	1	0	0	0	0	0	0
chrI	YAR031W	PRM9	205	2		2	0	0	0	0	0	0	0	0	0
chrI	YAR033W	MST28	93	3		1	1	0	0	0	0	0	0	0	0
chrI	YAR035W	YAT1	197	19		4	2	2	0	1	0	0	0	0	0
chrI	YAR042W	SWH1	258	19		3	2	0	1	0	0	0	1	0	0
chrI	YAR071W	PHO11	49	2		0	1	0	0	0	0	0	0	0	0
chrII	YBL107C	MIC23	142	12		3	0	1	0	0	1	0	0	0	0
chrII	YBL106C	SRO77	304	16		1	1	0	0	1	0	0	1	0	0
chrII	YBL105C	PKC1	282	15		8	0	1	1	0	0	0	0	0	0
chrII	YBL104C	SEA4	102	12		2	1	1	0	1	0	0	0	0	0
chrII	YBL103C	RTG3	361	9		5	2	0	0	0	0	0	0	0	0
chrII	YBL102W	SFT2	215	13		2	1	0	0	0	0	0	0	1	0
chrII	YBL099W	ATP1	266	8		2	1	0	1	0	0	0	0	0	0
chrII	YBL097W	BRN1	258	12		3	3	1	0	0	0	0	0	0	0
chrII	YBL095W		128	7		3	0	0	1	0	0	0	0	0	0
chrII	YBL093C	ROX3	168	12		2	1	0	2	0	0	0	0	0	0
chrII	YBL092W	RPL32	173	13		8	1	1	0	0	0	0	0	0	0
chrII	YBL091C	MAP2	212	13		5	2	0	1	0	0	0	0	0	0
chrII	YBL090W	MRP21	126	9		1	0	0	2	0	0	0	0	0	0
chrII	YBL089W	AVT5	343	24		10	2	0	0	2	0	0	0	0	0
chrII	YBL087C	RPL23A	134	13		5	1	2	0	0	0	0	0	0	0
chrII	YBL082C	ALG3	102	6		3	0	1	0	0	0	0	0	0	0
chrII	YBL081W		137	15		5	1	0	2	0	0	0	0	0	0
chrII	YBL079W	NUP170	131	8		4	2	0	0	0	0	0	0	0	0
chrII	YBL076C	ILS1	107	7		1	1	0	1	0	0	0	0	0	0
chrII	YBL075C	SSA3	81	8		2	3	0	0	0	0	0	0	0	0
chrII	YBL072C	RPS8A	119	9		1	0	1	0	1	0	0	0	0	0
chrII	YBL071W-A	KTI11	250	2		2	0	0	0	0	0	0	0	0	0
chrII	YBL069W	AST1	250	19		6	3	1	1	0	0	0	0	0	0
chrII	YBL068W	PRS4	89	3		0	0	1	0	0	0	0	0	0	0
chrII	YBL064C	PRX1	72	2		2	0	0	0	0	0	0	0	0	0
chrII	YBL061C	SKT5	112	16		2	2	2	1	0	0	0	0	0	0
chrII	YBL059C-A	CMC2	241	14		3	2	1	1	0	0	0	0	0	0
chrII	YBL058W	SHP1	126	5		3	1	0	0	0	0	0	0	0	0
chrII	YBL057C	PTH2	84	7		0	2	1	0	0	0	0	0	0	0
chrII	YBL056W	PTC3	399	14		5	0	1	0	0	1	0	0	0	0
chrII	YBL055C		260	19		4	1	0	0	0	1	1	0	0	0
chrII	YBL054W	TOD6	224	15		6	3	1	0	0	0	0	0	0	0
chrII	YBL052C	SAS3	101	11		0	1	1	0	0	1	0	0	0	0
chrII	YBL050W	SEC17	66	2		2	0	0	0	0	0	0	0	0	0
chrII	YBL047C	EDE1	241	14		6	2	0	1	0	0	0	0	0	0
chrII	YBL045C	COR1	333	10		4	1	0	1	0	0	0	0	0	0
chrII	YBL042C	FUI1	190	9		4	1	1	0	0	0	0	0	0	0
chrII	YBL041W	PRE7	141	14		3	2	0	0	0	0	1	0	0	0
chrII	YBL040C	ERD2	151	8		3	1	1	0	0	0	0	0	0	0
chrII	YBL039W-B		141	4		4	0	0	0	0	0	0	0	0	0
chrII	YBL039C	URA7	262	14		3	0	1	2	0	0	0	0	0	0
chrII	YBL038W	MRPL16	111	11		3	2	0	1	0	0	0	0	0	0
chrII	YBL036C		146	5		1	0	0	1	0	0	0	0	0	0
chrII	YBL035C	POL12	82	8		4	2	0	0	0	0	0	0	0	0
chrII	YBL033C	RIB1	79	5		5	0	0	0	0	0	0	0	0	0
chrII	YBL032W	HEK2	206	5		0	1	1	0	0	0	0	0	0	0
chrII	YBL030C	PET9	300	4		2	1	0	0	0	0	0	0	0	0
chrII	YBL029C-A		150	22		1	1	0	0	0	0	0	1	0	1
chrII	YBL028C		284	17		2	2	2	0	1	0	0	0	0	0
chrII	YBL027W	RPL19B	108	11		2	0	0	1	1	0	0	0	0	0
chrII	YBL026W	LSM2	130	4		0	0	0	1	0	0	0	0	0	0
chrII	YBL024W	NCL1	300	21		6	3	1	0	0	1	0	0	0	0
chrII	YBL021C	HAP3	170	5		3	1	0	0	0	0	0	0	0	0
chrII	YBL020W	RFT1	93	5		2	0	1	0	0	0	0	0	0	0
chrII	YBL019W	APN2	115	4		1	0	1	0	0	0	0	0	0	0
chrII	YBL018C	POP8	329	17		5	1	2	1	0	0	0	0	0	0
chrII	YBL017C	PEP1	72	4		0	0	0	1	0	0	0	0	0	0
chrII	YBL016W	FUS3	139	3		1	1	0	0	0	0	0	0	0	0
chrII	YBL014C	RRN6	161	15		3	0	1	1	1	0	0	0	0	0
chrII	YBL011W	SCT1	251	19		7	1	1	0	0	0	1	0	0	0
chrII	YBL010C		309	22		6	4	1	0	1	0	0	0	0	0
chrII	YBL009W	ALK2	132	5		0	0	0	0	1	0	0	0	0	0
chrII	YBL008W	HIR1	298	23		6	3	0	0	1	1	0	0	0	0
chrII	YBL007C	SLA1	167	9		4	1	1	0	0	0	0	0	0	0
chrII	YBL006C	LDB7	237	19		4	0	1	3	0	0	0	0	0	0
chrII	YBL005W	PDR3	376	7		1	0	0	0	0	1	0	0	0	0
chrII	YBL003C	HTA2	290	25		6	2	3	0	0	1	0	0	0	0
chrII	YBL002W	HTB2	257	13		3	2	2	0	0	0	0	0	0	0
chrII	YBL001C	ECM15	88	10		2	1	2	0	0	0	0	0	0	0
chrII	YBR001C	NTH2	176	9		3	1	0	1	0	0	0	0	0	0
chrII	YBR002C	RER2	244	19		12	2	1	0	0	0	0	0	0	0
chrII	YBR004C	GPI18	93	2		2	0	0	0	0	0	0	0	0	0
chrII	YBR005W	RCR1	186	17		4	1	0	1	0	0	1	0	0	0
chrII	YBR006W	UGA2	145	7		1	1	0	1	0	0	0	0	0	0
chrII	YBR008C	FLR1	173	16		5	4	1	0	0	0	0	0	0	0
chrII	YBR009C	HHF1	186	5		1	2	0	0	0	0	0	0	0	0
chrII	YBR010W	HHT1	167	16		2	2	2	1	0	0	0	0	0	0
chrII	YBR011C	IPP1	121	2		2	0	0	0	0	0	0	0	0	0
chrII	YBR014C	GRX7	212	14		4	2	2	0	0	0	0	0	0	0
chrII	YBR015C	MNN2	172	14		5	1	0	0	0	0	1	0	0	0
chrII	YBR016W		323	9		3	0	2	0	0	0	0	0	0	0
chrII	YBR017C	KAP104	197	18		6	1	0	0	2	0	0	0	0	0
chrII	YBR021W	FUR4	186	17		4	5	1	0	0	0	0	0	0	0
chrII	YBR022W	POA1	162	19		6	0	2	0	0	0	1	0	0	0
chrII	YBR023C	CHS3	201	12		7	1	1	0	0	0	0	0	0	0
chrII	YBR024W	SCO2	327	8		1	1	0	0	1	0	0	0	0	0
chrII	YBR025C	OLA1	232	12		8	2	0	0	0	0	0	0	0	0
chrII	YBR026C	ETR1	124	2		2	0	0	0	0	0	0	0	0	0
chrII	YBR028C	YPK3	189	7		1	3	0	0	0	0	0	0	0	0
chrII	YBR029C	CDS1	150	6		3	0	1	0	0	0	0	0	0	0
chrII	YBR031W	RPL4A	114	6		3	0	1	0	0	0	0	0	0	0
chrII	YBR034C	HMT1	208	4		2	1	0	0	0	0	0	0	0	0
chrII	YBR035C	PDX3	125	11		4	1	0	0	1	0	0	0	0	0
chrII	YBR036C	CSG2	228	13		6	1	0	0	1	0	0	0	0	0
chrII	YBR037C	SCO1	73	6		0	1	0	1	0	0	0	0	0	0
chrII	YBR038W	CHS2	190	7		3	0	0	1	0	0	0	0	0	0
chrII	YBR039W	ATP3	190	2		2	0	0	0	0	0	0	0	0	0
chrII	YBR042C	CST26	143	9		4	1	1	0	0	0	0	0	0	0
chrII	YBR043C	QDR3	128	2		2	0	0	0	0	0	0	0	0	0
chrII	YBR044C	TCM62	91	6		1	1	1	0	0	0	0	0	0	0
chrII	YBR046C	ZTA1	386	31		10	2	0	1	0	1	1	0	0	0
chrII	YBR047W	FMP23	118	5		2	0	1	0	0	0	0	0	0	0
chrII	YBR048W	RPS11B	250	11		4	2	1	0	0	0	0	0	0	0
chrII	YBR049C	REB1	250	3		1	1	0	0	0	0	0	0	0	0
chrII	YBR052C	RFS1	59	4		0	0	0	1	0	0	0	0	0	0
chrII	YBR053C		343	17		5	0	1	1	1	0	0	0	0	0
chrII	YBR056W		53	5		0	1	1	0	0	0	0	0	0	0
chrII	YBR058C	UBP14	161	16		3	2	1	0	0	1	0	0	0	0
chrII	YBR058C-A	TSC3	192	6		2	2	0	0	0	0	0	0	0	0
chrII	YBR059C	AKL1	110	10		4	3	0	0	0	0	0	0	0	0
chrII	YBR060C	ORC2	62	9		1	1	2	0	0	0	0	0	0	0
chrII	YBR062C		129	13		1	0	2	0	0	1	0	0	0	0
chrII	YBR063C		115	9		2	2	1	0	0	0	0	0	0	0
chrII	YBR066C	NRG2	137	10		1	1	0	0	0	0	1	0	0	0
chrII	YBR067C	TIP1	154	14		3	2	1	1	0	0	0	0	0	0
chrII	YBR068C	BAP2	218	6		3	0	1	0	0	0	0	0	0	0
chrII	YBR069C	TAT1	166	12		5	2	1	0	0	0	0	0	0	0
chrII	YBR070C	ALG14	43	2		2	0	0	0	0	0	0	0	0	0
chrII	YBR071W		275	8		1	0	0	0	0	0	1	0	0	0
chrII	YBR072W	HSP26	167	4		0	0	0	1	0	0	0	0	0	0
chrII	YBR073W	RDH54	86	5		1	0	0	1	0	0	0	0	0	0
chrII	YBR074W	PFF1	126	13		8	1	1	0	0	0	0	0	0	0
chrII	YBR077C	SLM4	236	13		0	0	0	0	0	0	0	0	0	1
chrII	YBR078W	ECM33	376	14		5	3	1	0	0	0	0	0	0	0
chrII	YBR079C	RPG1	89	3		3	0	0	0	0	0	0	0	0	0
chrII	YBR080C	SEC18	200	16		2	0	1	0	0	0	0	0	0	1
chrII	YBR081C	SPT7	148	14		4	3	0	1	0	0	0	0	0	0
chrII	YBR082C	UBC4	179	8		2	0	0	0	0	1	0	0	0	0
chrII	YBR083W	TEC1	144	14		1	3	1	1	0	0	0	0	0	0
chrII	YBR084W	MIS1	163	5		1	2	0	0	0	0	0	0	0	0
chrII	YBR084C-A	RPL19A	122	9		2	1	0	0	1	0	0	0	0	0
chrII	YBR085W	AAC3	257	15		3	2	1	0	1	0	0	0	0	0
chrII	YBR085C-A		387	12		2	1	1	0	1	0	0	0	0	0
chrII	YBR086C	IST2	135	7		3	0	0	1	0	0	0	0	0	0
chrII	YBR087W	RFC5	73	5		3	1	0	0	0	0	0	0	0	0
chrII	YBR089C-A	NHP6B	206	11		2	0	0	1	1	0	0	0	0	0
chrII	YBR090C		349	11		2	0	0	1	1	0	0	0	0	0
chrII	YBR091C	TIM12	131	11		4	2	1	0	0	0	0	0	0	0
chrII	YBR092C	PHO3	60	3		3	0	0	0	0	0	0	0	0	0
chrII	YBR093C	PHO5	74	3		3	0	0	0	0	0	0	0	0	0
chrII	YBR094W	PBY1	205	5		3	1	0	0	0	0	0	0	0	0
chrII	YBR095C	RXT2	91	5		0	0	0	0	1	0	0	0	0	0
chrII	YBR096W		85	7		1	0	0	0	0	1	0	0	0	0
chrII	YBR101C	FES1	263	16		3	2	3	0	0	0	0	0	0	0
chrII	YBR102C	EXO84	397	15		8	2	1	0	0	0	0	0	0	0
chrII	YBR103W	SIF2	53	3		3	0	0	0	0	0	0	0	0	0
chrII	YBR104W	YMC2	140	13		5	0	0	2	0	0	0	0	0	0
chrII	YBR105C	VID24	214	13		4	2	0	0	1	0	0	0	0	0
chrII	YBR106W	PHO88	363	6		2	2	0	0	0	0	0	0	0	0
chrII	YBR108W	AIM3	283	24		12	1	0	1	0	1	0	0	0	0
chrII	YBR109C	CMD1	247	13		5	1	2	0	0	0	0	0	0	0
chrII	YBR110W	ALG1	108	3		1	1	0	0	0	0	0	0	0	0
chrII	YBR111C	YSA1	73	6		3	0	1	0	0	0	0	0	0	0
chrII	YBR112C	CYC8	289	7		5	1	0	0	0	0	0	0	0	0
chrII	YBR114W	RAD16	103	12		2	1	0	0	0	0	0	1	0	0
chrII	YBR115C	LYS2	140	11		3	2	0	1	0	0	0	0	0	0
chrII	YBR118W	TEF2	103	9		2	0	1	1	0	0	0	0	0	0
chrII	YBR119W	MUD1	163	8		2	0	2	0	0	0	0	0	0	0
chrII	YBR121C	GRS1	162	21		4	3	2	0	1	0	0	0	0	0
chrII	YBR122C	MRPL36	219	11		3	2	0	1	0	0	0	0	0	0
chrII	YBR123C	TFC1	77	13		5	2	0	1	0	0	0	0	0	0
chrII	YBR125C	PTC4	264	8		2	0	0	0	0	1	0	0	0	0
chrII	YBR126C	TPS1	138	3		0	0	1	0	0	0	0	0	0	0
chrII	YBR126W-A		158	3		1	1	0	0	0	0	0	0	0	0
chrII	YBR127C	VMA2	211	21		3	3	2	0	0	1	0	0	0	0
chrII	YBR130C	SHE3	115	5		2	0	1	0	0	0	0	0	0	0
chrII	YBR133C	HSL7	305	14		3	2	0	0	0	0	1	0	0	0
chrII	YBR136W	MEC1	212	4		4	0	0	0	0	0	0	0	0	0
chrII	YBR137W		249	13		6	0	1	1	0	0	0	0	0	0
chrII	YBR138C		159	2		2	0	0	0	0	0	0	0	0	0
chrII	YBR139W		310	15		8	1	0	0	1	0	0	0	0	0
chrII	YBR140C	IRA1	150	11		4	2	1	0	0	0	0	0	0	0
chrII	YBR141C	BMT2	168	15		5	0	0	0	2	0	0	0	0	0
chrII	YBR142W	MAK5	200	14		5	1	1	1	0	0	0	0	0	0
chrII	YBR143C	SUP45	242	12		4	2	0	1	0	0	0	0	0	0
chrII	YBR145W	ADH5	207	25		7	4	2	1	0	0	0	0	0	0
chrII	YBR146W	MRPS9	391	18		4	1	1	1	1	0	0	0	0	0
chrII	YBR149W	ARA1	218	13		4	2	0	0	1	0	0	0	0	0
chrII	YBR151W	APD1	227	12		4	4	0	0	0	0	0	0	0	0
chrII	YBR153W	RIB7	246	20		11	1	0	0	0	0	1	0	0	0
chrII	YBR154C	RPB5	103	5		3	1	0	0	0	0	0	0	0	0
chrII	YBR155W	CNS1	155	18		9	3	1	0	0	0	0	0	0	0
chrII	YBR156C	SLI15	180	12		1	2	1	1	0	0	0	0	0	0
chrII	YBR158W	AMN1	222	17		6	1	1	0	0	1	0	0	0	0
chrII	YBR160W	CDC28	145	4		2	1	0	0	0	0	0	0	0	0
chrII	YBR161W	CSH1	274	15		4	0	0	0	0	0	0	0	0	1
chrII	YBR162C	TOS1	371	12		4	1	0	0	0	1	0	0	0	0
chrII	YBR162W-A	YSY6	109	12		1	0	0	1	0	0	1	0	0	0
chrII	YBR163W	EXO5	90	6		1	1	1	0	0	0	0	0	0	0
chrII	YBR164C	ARL1	240	11		3	4	0	0	0	0	0	0	0	0
chrII	YBR166C	TYR1	101	9		3	1	0	1	0	0	0	0	0	0
chrII	YBR169C	SSE2	195	16		5	1	0	1	1	0	0	0	0	0
chrII	YBR170C	NPL4	183	14		6	1	2	0	0	0	0	0	0	0
chrII	YBR171W	SEC66	137	7		3	2	0	0	0	0	0	0	0	0
chrII	YBR172C	SMY2	151	10		3	2	1	0	0	0	0	0	0	0
chrII	YBR173C	UMP1	141	3		1	1	0	0	0	0	0	0	0	0
chrII	YBR175W	SWD3	127	8		4	0	0	1	0	0	0	0	0	0
chrII	YBR176W	ECM31	199	7		3	2	0	0	0	0	0	0	0	0
chrII	YBR177C	EHT1	196	14		8	0	0	0	0	1	0	0	0	0
chrII	YBR179C	FZO1	137	18		4	0	1	0	1	1	0	0	0	0
chrII	YBR181C	RPS6B	109	7		2	1	1	0	0	0	0	0	0	0
chrII	YBR187W	GDT1	271	28		7	1	2	2	1	0	0	0	0	0
chrII	YBR188C	NTC20	335	23		5	3	1	1	1	0	0	0	0	0
chrII	YBR189W	RPS9B	69	6		3	0	1	0	0	0	0	0	0	0
chrII	YBR191W	RPL21A	188	7		1	1	0	1	0	0	0	0	0	0
chrII	YBR193C	MED8	393	18		9	1	0	0	0	0	1	0	0	0
chrII	YBR194W	AIM4	272	12		4	4	0	0	0	0	0	0	0	0
chrII	YBR195C	MSI1	155	8		5	0	1	0	0	0	0	0	0	0
chrII	YBR196C	PGI1	195	9		1	0	0	2	0	0	0	0	0	0
chrII	YBR198C	TAF5	96	8		0	1	2	0	0	0	0	0	0	0
chrII	YBR199W	KTR4	258	17		3	1	1	1	1	0	0	0	0	0
chrII	YBR200W	BEM1	274	6		3	0	1	0	0	0	0	0	0	0
chrII	YBR201W	DER1	273	10		5	0	0	0	1	0	0	0	0	0
chrII	YBR202W	MCM7	175	5		0	1	1	0	0	0	0	0	0	0
chrII	YBR205W	KTR3	209	14		4	1	1	0	1	0	0	0	0	0
chrII	YBR207W	FTH1	139	13		2	0	1	2	0	0	0	0	0	0
chrII	YBR211C	AME1	131	4		1	0	1	0	0	0	0	0	0	0
chrII	YBR212W	NGR1	206	3		1	1	0	0	0	0	0	0	0	0
chrII	YBR213W	MET8	215	8		1	0	1	1	0	0	0	0	0	0
chrII	YBR214W	SDS24	203	4		4	0	0	0	0	0	0	0	0	0
chrII	YBR215W	HPC2	393	13		4	1	1	1	0	0	0	0	0	0
chrII	YBR216C	YBP1	293	20		9	4	1	0	0	0	0	0	0	0
chrII	YBR217W	ATG12	327	9		4	1	1	0	0	0	0	0	0	0
chrII	YBR218C	PYC2	167	12		4	1	2	0	0	0	0	0	0	0
chrII	YBR220C		273	10		7	0	1	0	0	0	0	0	0	0
chrII	YBR221C	PDB1	243	8		3	1	1	0	0	0	0	0	0	0
chrII	YBR222C	PCS60	114	5		0	0	0	0	1	0	0	0	0	0
chrII	YBR230C	OM14	167	11		4	0	1	1	0	0	0	0	0	0
chrII	YBR231C	SWC5	72	5		3	1	0	0	0	0	0	0	0	0
chrII	YBR233W	PBP2	177	8		2	3	0	0	0	0	0	0	0	0
chrII	YBR233W-A	DAD3	352	32		16	4	0	0	0	0	0	1	0	0
chrII	YBR234C	ARC40	108	12		3	1	0	0	0	0	1	0	0	0
chrII	YBR235W	VHC1	114	13		3	0	0	0	0	0	0	0	0	1
chrII	YBR236C	ABD1	149	8		4	0	0	1	0	0	0	0	0	0
chrII	YBR237W	PRP5	90	6		3	0	1	0	0	0	0	0	0	0
chrII	YBR239C	ERT1	285	8		3	1	1	0	0	0	0	0	0	0
chrII	YBR242W		172	16		11	0	0	0	1	0	0	0	0	0
chrII	YBR243C	ALG7	383	13		3	1	1	0	1	0	0	0	0	0
chrII	YBR244W	GPX2	205	12		4	4	0	0	0	0	0	0	0	0
chrII	YBR245C	ISW1	324	24		8	1	1	0	1	1	0	0	0	0
chrII	YBR246W	RRT2	149	8		3	1	1	0	0	0	0	0	0	0
chrII	YBR247C	ENP1	132	4		2	1	0	0	0	0	0	0	0	0
chrII	YBR248C	HIS7	184	7		5	1	0	0	0	0	0	0	0	0
chrII	YBR249C	ARO4	206	12		7	1	1	0	0	0	0	0	0	0
chrII	YBR251W	MRPS5	125	7		5	1	0	0	0	0	0	0	0	0
chrII	YBR252W	DUT1	81	5		3	1	0	0	0	0	0	0	0	0
chrII	YBR253W	SRB6	89	2		2	0	0	0	0	0	0	0	0	0
chrII	YBR254C	TRS20	169	11		6	1	1	0	0	0	0	0	0	0
chrII	YBR255W	MTC4	168	10		4	1	0	1	0	0	0	0	0	0
chrII	YBR255C-A		105	5		1	2	0	0	0	0	0	0	0	0
chrII	YBR256C	RIB5	204	15		5	2	2	0	0	0	0	0	0	0
chrII	YBR257W	POP4	261	19		4	1	1	1	0	1	0	0	0	0
chrII	YBR258C	SHG1	367	16		4	2	0	0	0	0	0	1	0	0
chrII	YBR260C	RGD1	186	6		2	0	0	1	0	0	0	0	0	0
chrII	YBR261C	TAE1	169	8		3	1	1	0	0	0	0	0	0	0
chrII	YBR263W	SHM1	70	8		1	1	0	0	1	0	0	0	0	0
chrII	YBR264C	YPT10	111	10		4	1	0	1	0	0	0	0	0	0
chrII	YBR265W	TSC10	149	11		1	0	1	0	0	0	1	0	0	0
chrII	YBR267W	REI1	133	10		0	1	1	0	1	0	0	0	0	0
chrII	YBR268W	MRPL37	118	6		2	0	0	1	0	0	0	0	0	0
chrII	YBR269C	FMP21	183	12		3	2	0	0	1	0	0	0	0	0
chrII	YBR271W	EFM2	166	21		4	3	2	0	1	0	0	0	0	0
chrII	YBR272C	HSM3	246	12		2	2	2	0	0	0	0	0	0	0
chrII	YBR273C	UBX7	116	6		3	0	1	0	0	0	0	0	0	0
chrII	YBR274W	CHK1	201	8		2	1	0	1	0	0	0	0	0	0
chrII	YBR276C	PPS1	94	8		2	1	0	1	0	0	0	0	0	0
chrII	YBR278W	DPB3	205	17		3	2	2	1	0	0	0	0	0	0
chrII	YBR279W	PAF1	151	5		3	1	0	0	0	0	0	0	0	0
chrII	YBR280C	SAF1	182	13		6	2	1	0	0	0	0	0	0	0
chrII	YBR281C	DUG2	129	14		2	3	2	0	0	0	0	0	0	0
chrII	YBR283C	SSH1	180	10		5	1	1	0	0	0	0	0	0	0
chrII	YBR287W		229	24		4	1	1	2	0	0	1	0	0	0
chrII	YBR289W	SNF5	85	11		3	2	0	1	0	0	0	0	0	0
chrII	YBR290W	BSD2	132	14		2	0	0	1	0	0	0	1	0	0
chrII	YBR291C	CTP1	94	5		1	2	0	0	0	0	0	0	0	0
chrII	YBR293W	VBA2	358	20		11	3	1	0	0	0	0	0	0	0
chrII	YBR297W	MAL33	249	10		3	0	0	0	0	0	1	0	0	0
chrII	YBR298C	MAL31	93	4		2	1	0	0	0	0	0	0	0	0
chrIII	YCL064C	CHA1	170	10		5	0	0	0	1	0	0	0	0	0
chrIII	YCL059C	KRR1	111	4		2	1	0	0	0	0	0	0	0	0
chrIII	YCL058W-A	ADF1	65	2		0	1	0	0	0	0	0	0	0	0
chrIII	YCL057C-A	MOS1	145	12		1	0	1	2	0	0	0	0	0	0
chrIII	YCL057W	PRD1	151	16		4	2	1	0	1	0	0	0	0	0
chrIII	YCL056C	PEX34	73	6		2	2	0	0	0	0	0	0	0	0
chrIII	YCL055W	KAR4	205	11		8	0	1	0	0	0	0	0	0	0
chrIII	YCL052C	PBN1	175	15		2	0	0	0	0	1	1	0	0	0
chrIII	YCL050C	APA1	135	6		4	1	0	0	0	0	0	0	0	0
chrIII	YCL049C		183	10		8	1	0	0	0	0	0	0	0	0
chrIII	YCL045C	EMC1	60	6		1	0	0	0	1	0	0	0	0	0
chrIII	YCL043C	PDI1	96	6		2	2	0	0	0	0	0	0	0	0
chrIII	YCL040W	GLK1	197	3		3	0	0	0	0	0	0	0	0	0
chrIII	YCL038C	ATG22	86	5		2	0	1	0	0	0	0	0	0	0
chrIII	YCL035C	GRX1	178	3		3	0	0	0	0	0	0	0	0	0
chrIII	YCL034W	LSB5	119	5		2	0	1	0	0	0	0	0	0	0
chrIII	YCL032W	STE50	227	6		6	0	0	0	0	0	0	0	0	0
chrIII	YCL031C	RRP7	118	10		2	0	1	0	1	0	0	0	0	0
chrIII	YCL030C	HIS4	137	13		2	1	1	0	0	1	0	0	0	0
chrIII	YCL029C	BIK1	264	12		4	1	2	0	0	0	0	0	0	0
chrIII	YCL028W	RNQ1	128	5		2	0	1	0	0	0	0	0	0	0
chrIII	YCL025C	AGP1	85	6		2	0	0	1	0	0	0	0	0	0
chrIII	YCL017C	NFS1	284	8		5	0	1	0	0	0	0	0	0	0
chrIII	YCL011C	GBP2	138	21		5	1	2	2	0	0	0	0	0	0
chrIII	YCL009C	ILV6	149	10		1	3	1	0	0	0	0	0	0	0
chrIII	YCL008C	STP22	161	5		3	1	0	0	0	0	0	0	0	0
chrIII	YCL005W-A	VMA9	122	3		1	1	0	0	0	0	0	0	0	0
chrIII	YCL005W	LDB16	207	10		2	0	1	0	1	0	0	0	0	0
chrIII	YCL002C		267	7		3	0	0	1	0	0	0	0	0	0
chrIII	YCL001W	RER1	107	10		4	1	0	1	0	0	0	0	0	0
chrIII	YCR002C	CDC10	228	14		2	1	2	1	0	0	0	0	0	0
chrIII	YCR003W	MRPL32	125	8		2	1	0	1	0	0	0	0	0	0
chrIII	YCR004C	YCP4	185	3		3	0	0	0	0	0	0	0	0	0
chrIII	YCR005C	CIT2	156	17		2	0	1	0	0	0	0	0	0	1
chrIII	YCR007C		346	11		9	1	0	0	0	0	0	0	0	0
chrIII	YCR009C	RVS161	101	3		1	1	0	0	0	0	0	0	0	0
chrIII	YCR011C	ADP1	136	2		2	0	0	0	0	0	0	0	0	0
chrIII	YCR012W	PGK1	180	9		3	1	0	1	0	0	0	0	0	0
chrIII	YCR015C		288	12		7	0	0	0	1	0	0	0	0	0
chrIII	YCR016W		290	23		10	3	1	1	0	0	0	0	0	0
chrIII	YCR017C	CWH43	202	6		4	1	0	0	0	0	0	0	0	0
chrIII	YCR018C	SRD1	377	13		5	2	0	1	0	0	0	0	0	0
chrIII	YCR019W	MAK32	250	15		9	1	0	1	0	0	0	0	0	0
chrIII	YCR020C-A	MAK31	389	10		3	1	0	0	1	0	0	0	0	0
chrIII	YCR021C	HSP30	251	8		6	1	0	0	0	0	0	0	0	0
chrIII	YCR023C		286	7		4	0	1	0	0	0	0	0	0	0
chrIII	YCR024C	SLM5	284	19		8	4	1	0	0	0	0	0	0	0
chrIII	YCR024C-B		281	13		0	0	1	0	2	0	0	0	0	0
chrIII	YCR026C	NPP1	240	14		7	2	1	0	0	0	0	0	0	0
chrIII	YCR027C	RHB1	268	18		7	1	0	1	1	0	0	0	0	0
chrIII	YCR028C	FEN2	263	9		5	0	0	1	0	0	0	0	0	0
chrIII	YCR028C-A	RIM1	192	7		1	1	0	1	0	0	0	0	0	0
chrIII	YCR030C	SYP1	179	7		0	2	1	0	0	0	0	0	0	0
chrIII	YCR031C	RPS14A	136	5		3	1	0	0	0	0	0	0	0	0
chrIII	YCR032W	BPH1	141	11		3	0	1	0	1	0	0	0	0	0
chrIII	YCR033W	SNT1	178	9		2	0	1	1	0	0	0	0	0	0
chrIII	YCR034W	FEN1	265	14		8	0	0	0	0	1	0	0	0	0
chrIII	YCR036W	RBK1	87	12		5	2	1	0	0	0	0	0	0	0
chrIII	YCR037C	PHO87	96	14		4	2	0	0	0	1	0	0	0	0
chrIII	YCR038C	BUD5	208	15		2	1	1	0	0	0	0	1	0	0
chrIII	YCR044C	PER1	104	19		2	0	1	2	0	1	0	0	0	0
chrIII	YCR046C	IMG1	111	7		1	0	0	0	0	1	0	0	0	0
chrIII	YCR047C	BUD23	215	22		4	1	0	0	0	0	0	2	0	0
chrIII	YCR048W	ARE1	214	11		1	1	0	0	0	0	0	1	0	0
chrIII	YCR051W		180	4		4	0	0	0	0	0	0	0	0	0
chrIII	YCR052W	RSC6	267	24		3	2	4	0	1	0	0	0	0	0
chrIII	YCR053W	THR4	221	17		5	1	2	1	0	0	0	0	0	0
chrIII	YCR057C	PWP2	122	6		3	0	1	0	0	0	0	0	0	0
chrIII	YCR059C	YIH1	190	4		2	1	0	0	0	0	0	0	0	0
chrIII	YCR060W	TAH1	133	3		1	1	0	0	0	0	0	0	0	0
chrIII	YCR061W		358	5		1	0	0	1	0	0	0	0	0	0
chrIII	YCR063W	BUD31	395	2		2	0	0	0	0	0	0	0	0	0
chrIII	YCR065W	HCM1	348	10		5	1	1	0	0	0	0	0	0	0
chrIII	YCR067C	SED4	187	12		6	3	0	0	0	0	0	0	0	0
chrIII	YCR069W	CPR4	132	11		0	1	1	0	0	1	0	0	0	0
chrIII	YCR071C	IMG2	104	7		3	2	0	0	0	0	0	0	0	0
chrIII	YCR072C	RSA4	168	15		5	3	0	1	0	0	0	0	0	0
chrIII	YCR073C	SSK22	92	8		1	2	1	0	0	0	0	0	0	0
chrIII	YCR073W-A	SOL2	203	5		2	0	1	0	0	0	0	0	0	0
chrIII	YCR075C	ERS1	165	6		1	1	1	0	0	0	0	0	0	0
chrIII	YCR075W-A		116	8		5	0	1	0	0	0	0	0	0	0
chrIII	YCR076C	FUB1	110	7		3	0	0	1	0	0	0	0	0	0
chrIII	YCR077C	PAT1	138	19		3	0	0	0	0	0	1	0	1	0
chrIII	YCR082W	AHC2	192	15		2	2	3	0	0	0	0	0	0	0
chrIII	YCR084C	TUP1	342	22		2	1	3	1	1	0	0	0	0	0
chrIII	YCR086W	CSM1	60	6		1	0	0	0	1	0	0	0	0	0
chrIII	YCR087C-A		67	5		0	0	0	0	1	0	0	0	0	0
chrIII	YCR088W	ABP1	142	16		2	1	1	0	0	0	0	0	1	0
chrIII	YCR090C		81	8		0	0	0	0	0	0	0	1	0	0
chrIII	YCR093W	CDC39	110	12		2	0	1	0	0	0	1	0	0	0
chrIII	YCR094W	CDC50	273	3		1	1	0	0	0	0	0	0	0	0
chrIII	YCR097W	HMRA1	43	8		1	0	1	1	0	0	0	0	0	0
chrIV	YDL241W		333	17		8	2	0	0	1	0	0	0	0	0
chrIV	YDL237W	AIM6	296	18		9	1	1	1	0	0	0	0	0	0
chrIV	YDL236W	PHO13	196	7		1	3	0	0	0	0	0	0	0	0
chrIV	YDL235C	YPD1	143	6		2	2	0	0	0	0	0	0	0	0
chrIV	YDL234C	GYP7	104	11		4	0	0	0	0	0	1	0	0	0
chrIV	YDL233W	MFG1	250	5		2	0	1	0	0	0	0	0	0	0
chrIV	YDL232W	OST4	290	15		2	1	0	0	1	1	0	0	0	0
chrIV	YDL231C	BRE4	104	7		7	0	0	0	0	0	0	0	0	0
chrIV	YDL230W	PTP1	60	6		2	2	0	0	0	0	0	0	0	0
chrIV	YDL229W	SSB1	106	7		1	1	0	1	0	0	0	0	0	0
chrIV	YDL226C	GCS1	253	27		11	2	1	1	1	0	0	0	0	0
chrIV	YDL225W	SHS1	103	4		2	1	0	0	0	0	0	0	0	0
chrIV	YDL224C	WHI4	246	15		5	2	2	0	0	0	0	0	0	0
chrIV	YDL219W	DTD1	277	8		8	0	0	0	0	0	0	0	0	0
chrIV	YDL217C	TIM22	329	26		7	2	2	1	1	0	0	0	0	0
chrIV	YDL216C	RRI1	131	3		1	1	0	0	0	0	0	0	0	0
chrIV	YDL215C	GDH2	154	8		4	2	0	0	0	0	0	0	0	0
chrIV	YDL213C	NOP6	138	14		5	0	3	0	0	0	0	0	0	0
chrIV	YDL212W	SHR3	166	7		1	1	0	1	0	0	0	0	0	0
chrIV	YDL208W	NHP2	149	5		1	2	0	0	0	0	0	0	0	0
chrIV	YDL207W	GLE1	76	4		4	0	0	0	0	0	0	0	0	0
chrIV	YDL202W	MRPL11	152	10		4	0	0	0	0	1	0	0	0	0
chrIV	YDL201W	TRM8	83	10		1	1	1	1	0	0	0	0	0	0
chrIV	YDL198C	GGC1	169	12		4	1	2	0	0	0	0	0	0	0
chrIV	YDL197C	ASF2	104	8		2	0	0	0	0	1	0	0	0	0
chrIV	YDL195W	SEC31	186	16		5	2	0	0	0	0	1	0	0	0
chrIV	YDL193W	NUS1	269	20		6	4	2	0	0	0	0	0	0	0
chrIV	YDL192W	ARF1	271	20		7	5	1	0	0	0	0	0	0	0
chrIV	YDL191W	RPL35A	108	6		2	2	0	0	0	0	0	0	0	0
chrIV	YDL189W	RBS1	106	6		4	1	0	0	0	0	0	0	0	0
chrIV	YDL188C	PPH22	154	24		5	3	3	1	0	0	0	0	0	0
chrIV	YDL185W	VMA1	354	35		13	6	2	1	0	0	0	0	0	0
chrIV	YDL182W	LYS20	94	3		0	0	1	0	0	0	0	0	0	0
chrIV	YDL181W	INH1	118	5		0	1	1	0	0	0	0	0	0	0
chrIV	YDL180W		68	7		3	2	0	0	0	0	0	0	0	0
chrIV	YDL179W	PCL9	233	20		3	4	1	0	0	1	0	0	0	0
chrIV	YDL178W	DLD2	73	6		0	1	0	1	0	0	0	0	0	0
chrIV	YDL177C		95	2		2	0	0	0	0	0	0	0	0	0
chrIV	YDL176W		132	7		0	1	0	0	1	0	0	0	0	0
chrIV	YDL175C	AIR2	231	7		2	1	1	0	0	0	0	0	0	0
chrIV	YDL168W	SFA1	58	2		2	0	0	0	0	0	0	0	0	0
chrIV	YDL167C	NRP1	191	16		10	1	0	1	0	0	0	0	0	0
chrIV	YDL166C	FAP7	141	11		1	2	2	0	0	0	0	0	0	0
chrIV	YDL165W	CDC36	45	5		2	0	1	0	0	0	0	0	0	0
chrIV	YDL164C	CDC9	163	5		0	0	0	0	1	0	0	0	0	0
chrIV	YDL161W	ENT1	120	4		2	1	0	0	0	0	0	0	0	0
chrIV	YDL160C-A	MHF2	327	23		13	3	0	1	0	0	0	0	0	0
chrIV	YDL157C		290	14		3	2	1	1	0	0	0	0	0	0
chrIV	YDL155W	CLB3	220	12		4	1	0	0	0	1	0	0	0	0
chrIV	YDL153C	SAS10	165	13		3	3	0	1	0	0	0	0	0	0
chrIV	YDL150W	RPC53	125	11		2	2	0	0	1	0	0	0	0	0
chrIV	YDL148C	NOP14	337	13		4	3	1	0	0	0	0	0	0	0
chrIV	YDL147W	RPN5	154	6		0	1	0	1	0	0	0	0	0	0
chrIV	YDL146W	LDB17	327	26		9	3	2	0	1	0	0	0	0	0
chrIV	YDL145C	COP1	181	6		4	1	0	0	0	0	0	0	0	0
chrIV	YDL144C		95	3		0	0	1	0	0	0	0	0	0	0
chrIV	YDL142C	CRD1	290	9		5	2	0	0	0	0	0	0	0	0
chrIV	YDL139C	SCM3	143	9		3	3	0	0	0	0	0	0	0	0
chrIV	YDL137W	ARF2	194	4		4	0	0	0	0	0	0	0	0	0
chrIV	YDL136W	RPL35B	145	15		6	3	1	0	0	0	0	0	0	0
chrIV	YDL135C	RDI1	253	4		1	0	1	0	0	0	0	0	0	0
chrIV	YDL134C	PPH21	122	10		5	1	1	0	0	0	0	0	0	0
chrIV	YDL133C-A	RPL41B	231	5		5	0	0	0	0	0	0	0	0	0
chrIV	YDL133W	SRF1	107	7		1	0	0	0	0	1	0	0	0	0
chrIV	YDL132W	CDC53	178	7		3	2	0	0	0	0	0	0	0	0
chrIV	YDL131W	LYS21	129	8		4	2	0	0	0	0	0	0	0	0
chrIV	YDL130W-A	STF1	162	4		0	0	0	1	0	0	0	0	0	0
chrIV	YDL130W	RPP1B	117	5		3	1	0	0	0	0	0	0	0	0
chrIV	YDL128W	VCX1	195	15		7	2	0	1	0	0	0	0	0	0
chrIV	YDL127W	PCL2	171	3		0	0	1	0	0	0	0	0	0	0
chrIV	YDL126C	CDC48	96	10		5	1	1	0	0	0	0	0	0	0
chrIV	YDL125C	HNT1	163	13		1	0	0	0	0	0	0	0	0	1
chrIV	YDL124W		74	3		1	1	0	0	0	0	0	0	0	0
chrIV	YDL122W	UBP1	86	9		4	1	1	0	0	0	0	0	0	0
chrIV	YDL121C		200	9		1	1	0	0	0	1	0	0	0	0
chrIV	YDL120W	YFH1	204	25		6	2	2	1	1	0	0	0	0	0
chrIV	YDL117W	CYK3	169	15		5	1	1	0	1	0	0	0	0	0
chrIV	YDL116W	NUP84	244	13		3	2	0	0	0	1	0	0	0	0
chrIV	YDL113C	ATG20	199	9		5	2	0	0	0	0	0	0	0	0
chrIV	YDL112W	TRM3	193	14		9	0	0	0	1	0	0	0	0	0
chrIV	YDL111C	RRP42	86	7		3	2	0	0	0	0	0	0	0	0
chrIV	YDL108W	KIN28	86	9		5	0	0	1	0	0	0	0	0	0
chrIV	YDL105W	NSE4	159	8		5	0	1	0	0	0	0	0	0	0
chrIV	YDL103C	QRI1	268	14		10	0	0	1	0	0	0	0	0	0
chrIV	YDL102W	POL3	211	9		3	3	0	0	0	0	0	0	0	0
chrIV	YDL101C	DUN1	145	8		5	0	1	0	0	0	0	0	0	0
chrIV	YDL100C	GET3	74	4		1	0	1	0	0	0	0	0	0	0
chrIV	YDL099W	BUG1	138	8		4	2	0	0	0	0	0	0	0	0
chrIV	YDL097C	RPN6	98	10		3	2	1	0	0	0	0	0	0	0
chrIV	YDL095W	PMT1	221	12		5	2	1	0	0	0	0	0	0	0
chrIV	YDL093W	PMT5	298	8		1	0	1	1	0	0	0	0	0	0
chrIV	YDL092W	SRP14	161	7		2	1	1	0	0	0	0	0	0	0
chrIV	YDL091C	UBX3	126	7		3	2	0	0	0	0	0	0	0	0
chrIV	YDL090C	RAM1	143	7		4	0	1	0	0	0	0	0	0	0
chrIV	YDL085C-A		299	14		5	0	3	0	0	0	0	0	0	0
chrIV	YDL084W	SUB2	129	8		1	2	1	0	0	0	0	0	0	0
chrIV	YDL083C	RPS16B	138	7		2	0	0	0	1	0	0	0	0	0
chrIV	YDL082W	RPL13A	143	9		4	1	1	0	0	0	0	0	0	0
chrIV	YDL081C	RPP1A	106	4		2	1	0	0	0	0	0	0	0	0
chrIV	YDL080C	THI3	213	8		2	3	0	0	0	0	0	0	0	0
chrIV	YDL078C	MDH3	182	17		6	1	0	1	1	0	0	0	0	0
chrIV	YDL076C	RXT3	259	14		2	1	0	0	2	0	0	0	0	0
chrIV	YDL075W	RPL31A	101	10		1	3	1	0	0	0	0	0	0	0
chrIV	YDL074C	BRE1	161	15		6	1	1	1	0	0	0	0	0	0
chrIV	YDL073W		147	4		1	0	1	0	0	0	0	0	0	0
chrIV	YDL072C	YET3	93	3		1	1	0	0	0	0	0	0	0	0
chrIV	YDL070W	BDF2	255	24		7	2	1	0	0	0	0	0	0	1
chrIV	YDL066W	IDP1	398	25		7	4	2	1	0	0	0	0	0	0
chrIV	YDL064W	UBC9	214	13		5	4	0	0	0	0	0	0	0	0
chrIV	YDL063C	SYO1	110	7		2	1	1	0	0	0	0	0	0	0
chrIV	YDL061C	RPS29B	173	4		0	0	0	1	0	0	0	0	0	0
chrIV	YDL060W	TSR1	112	11		5	0	2	0	0	0	0	0	0	0
chrIV	YDL058W	USO1	173	9		2	1	0	0	1	0	0	0	0	0
chrIV	YDL057W		49	5		0	1	1	0	0	0	0	0	0	0
chrIV	YDL055C	PSA1	254	10		6	0	0	1	0	0	0	0	0	0
chrIV	YDL053C	PBP4	194	12		0	1	0	0	0	0	0	0	0	1
chrIV	YDL052C	SLC1	280	10		4	0	0	0	0	1	0	0	0	0
chrIV	YDL051W	LHP1	264	16		0	1	0	0	1	0	0	0	1	0
chrIV	YDL048C	STP4	113	8		3	1	1	0	0	0	0	0	0	0
chrIV	YDL046W	NPC2	282	5		0	1	1	0	0	0	0	0	0	0
chrIV	YDL045W-A	MRP10	136	9		2	1	0	0	1	0	0	0	0	0
chrIV	YDL045C	FAD1	137	8		0	0	0	2	0	0	0	0	0	0
chrIV	YDL044C	MTF2	76	6		1	0	0	0	1	0	0	0	0	0
chrIV	YDL043C	PRP11	317	8		4	2	0	0	0	0	0	0	0	0
chrIV	YDL042C	SIR2	120	8		5	0	1	0	0	0	0	0	0	0
chrIV	YDL040C	NAT1	123	7		5	1	0	0	0	0	0	0	0	0
chrIV	YDL039C	PRM7	136	9		0	1	1	1	0	0	0	0	0	0
chrIV	YDL036C	PUS9	237	6		3	0	1	0	0	0	0	0	0	0
chrIV	YDL035C	GPR1	154	5		1	0	0	1	0	0	0	0	0	0
chrIV	YDL031W	DBP10	155	8		5	0	1	0	0	0	0	0	0	0
chrIV	YDL029W	ARP2	297	20		5	2	0	1	0	0	1	0	0	0
chrIV	YDL027C		203	22		6	1	0	0	0	1	0	1	0	0
chrIV	YDL025C	RTK1	177	3		3	0	0	0	0	0	0	0	0	0
chrIV	YDL022W	GPD1	229	11		5	3	0	0	0	0	0	0	0	0
chrIV	YDL020C	RPN4	179	16		3	3	1	1	0	0	0	0	0	0
chrIV	YDL019C	OSH2	153	9		2	1	0	0	1	0	0	0	0	0
chrIV	YDL018C	ERP3	185	7		4	0	1	0	0	0	0	0	0	0
chrIV	YDL015C	TSC13	255	4		2	1	0	0	0	0	0	0	0	0
chrIV	YDL014W	NOP1	236	8		4	0	0	1	0	0	0	0	0	0
chrIV	YDL013W	SLX5	130	3		3	0	0	0	0	0	0	0	0	0
chrIV	YDL012C		286	12		7	1	1	0	0	0	0	0	0	0
chrIV	YDL010W	GRX6	290	13		1	0	1	0	0	0	0	0	1	0
chrIV	YDL008W	APC11	114	7		0	0	1	1	0	0	0	0	0	0
chrIV	YDL007W	RPT2	79	5		2	0	1	0	0	0	0	0	0	0
chrIV	YDL005C	MED2	308	11		4	2	1	0	0	0	0	0	0	0
chrIV	YDL004W	ATP16	287	12		1	4	1	0	0	0	0	0	0	0
chrIV	YDL003W	MCD1	229	10		3	0	1	1	0	0	0	0	0	0
chrIV	YDL002C	NHP10	337	8		3	0	0	0	1	0	0	0	0	0
chrIV	YDR001C	NTH1	131	7		2	1	1	0	0	0	0	0	0	0
chrIV	YDR002W	YRB1	200	5		0	1	1	0	0	0	0	0	0	0
chrIV	YDR003W	RCR2	381	11		4	0	1	1	0	0	0	0	0	0
chrIV	YDR003W-A		231	11		4	0	1	1	0	0	0	0	0	0
chrIV	YDR005C	MAF1	306	32		6	4	1	1	1	1	0	0	0	0
chrIV	YDR006C	SOK1	93	3		1	1	0	0	0	0	0	0	0	0
chrIV	YDR007W	TRP1	400	17		11	3	0	0	0	0	0	0	0	0
chrIV	YDR009W	GAL3	92	15		1	2	1	0	0	0	1	0	0	0
chrIV	YDR011W	SNQ2	183	10		5	1	1	0	0	0	0	0	0	0
chrIV	YDR012W	RPL4B	75	3		1	1	0	0	0	0	0	0	0	0
chrIV	YDR013W	PSF1	94	4		1	0	1	0	0	0	0	0	0	0
chrIV	YDR016C	DAD1	230	9		4	1	1	0	0	0	0	0	0	0
chrIV	YDR019C	GCV1	178	3		0	0	1	0	0	0	0	0	0	0
chrIV	YDR020C	DAS2	392	10		1	0	0	0	0	0	0	0	1	0
chrIV	YDR021W	FAL1	99	9		4	0	0	0	1	0	0	0	0	0
chrIV	YDR022C	ATG31	159	14		3	2	1	1	0	0	0	0	0	0
chrIV	YDR023W	SES1	155	7		2	1	1	0	0	0	0	0	0	0
chrIV	YDR025W	RPS11A	100	5		2	0	1	0	0	0	0	0	0	0
chrIV	YDR026C	NSI1	222	15		8	1	0	0	1	0	0	0	0	0
chrIV	YDR027C	VPS54	102	7		2	1	1	0	0	0	0	0	0	0
chrIV	YDR028C	REG1	300	10		3	2	1	0	0	0	0	0	0	0
chrIV	YDR031W	MIC14	236	9		6	0	1	0	0	0	0	0	0	0
chrIV	YDR032C	PST2	155	3		1	1	0	0	0	0	0	0	0	0
chrIV	YDR033W	MRH1	338	17		9	4	0	0	0	0	0	0	0	0
chrIV	YDR034C	LYS14	293	16		2	1	1	0	0	0	0	0	1	0
chrIV	YDR035W	ARO3	284	15		7	0	0	0	0	0	0	1	0	0
chrIV	YDR037W	KRS1	80	4		1	0	1	0	0	0	0	0	0	0
chrIV	YDR038C	ENA5	215	12		5	0	1	1	0	0	0	0	0	0
chrIV	YDR041W	RSM10	205	14		1	1	0	0	1	1	0	0	0	0
chrIV	YDR044W	HEM13	149	6		2	0	0	1	0	0	0	0	0	0
chrIV	YDR045C	RPC11	225	15		2	0	1	0	2	0	0	0	0	0
chrIV	YDR046C	BAP3	164	7		3	2	0	0	0	0	0	0	0	0
chrIV	YDR047W	HEM12	93	3		3	0	0	0	0	0	0	0	0	0
chrIV	YDR050C	TPI1	98	3		3	0	0	0	0	0	0	0	0	0
chrIV	YDR051C	DET1	60	5		1	0	0	1	0	0	0	0	0	0
chrIV	YDR055W	PST1	167	13		3	0	2	1	0	0	0	0	0	0
chrIV	YDR056C		162	10		3	1	0	0	1	0	0	0	0	0
chrIV	YDR059C	UBC5	153	19		1	0	1	0	0	1	0	0	1	0
chrIV	YDR060W	MAK21	382	10		6	2	0	0	0	0	0	0	0	0
chrIV	YDR062W	LCB2	290	11		1	1	0	0	0	0	0	1	0	0
chrIV	YDR063W	AIM7	101	9		4	1	1	0	0	0	0	0	0	0
chrIV	YDR064W	RPS13	106	4		4	0	0	0	0	0	0	0	0	0
chrIV	YDR067C	OCA6	98	9		3	3	0	0	0	0	0	0	0	0
chrIV	YDR068W	DOS2	173	18		5	3	1	1	0	0	0	0	0	0
chrIV	YDR071C	PAA1	112	6		2	2	0	0	0	0	0	0	0	0
chrIV	YDR072C	IPT1	331	26		4	0	0	0	1	0	0	0	0	1
chrIV	YDR073W	SNF11	297	11		5	1	0	1	0	0	0	0	0	0
chrIV	YDR074W	TPS2	275	11		2	3	1	0	0	0	0	0	0	0
chrIV	YDR075W	PPH3	169	7		3	2	0	0	0	0	0	0	0	0
chrIV	YDR077W	SED1	329	13		4	2	0	0	1	0	0	0	0	0
chrIV	YDR079W	PET100	290	8		2	1	0	1	0	0	0	0	0	0
chrIV	YDR079C-A	TFB5	232	15		6	1	1	1	0	0	0	0	0	0
chrIV	YDR080W	VPS41	176	2		0	1	0	0	0	0	0	0	0	0
chrIV	YDR081C	PDC2	78	6		1	1	1	0	0	0	0	0	0	0
chrIV	YDR082W	STN1	155	5		3	1	0	0	0	0	0	0	0	0
chrIV	YDR086C	SSS1	232	17		3	4	0	0	0	1	0	0	0	0
chrIV	YDR087C	RRP1	103	3		1	1	0	0	0	0	0	0	0	0
chrIV	YDR088C	SLU7	211	9		3	1	0	1	0	0	0	0	0	0
chrIV	YDR089W		187	11		3	1	2	0	0	0	0	0	0	0
chrIV	YDR090C		346	4		2	1	0	0	0	0	0	0	0	0
chrIV	YDR091C	RLI1	351	10		3	0	0	0	0	0	1	0	0	0
chrIV	YDR093W	DNF2	67	4		2	1	0	0	0	0	0	0	0	0
chrIV	YDR096W	GIS1	232	11		3	2	0	1	0	0	0	0	0	0
chrIV	YDR098C	GRX3	103	5		2	0	1	0	0	0	0	0	0	0
chrIV	YDR099W	BMH2	345	13		3	1	1	0	1	0	0	0	0	0
chrIV	YDR100W	TVP15	283	10		4	3	0	0	0	0	0	0	0	0
chrIV	YDR101C	ARX1	134	13		4	1	1	1	0	0	0	0	0	0
chrIV	YDR103W	STE5	109	5		3	1	0	0	0	0	0	0	0	0
chrIV	YDR104C	SPO71	145	8		1	1	0	0	1	0	0	0	0	0
chrIV	YDR105C	TMS1	98	14		2	1	0	0	2	0	0	0	0	0
chrIV	YDR107C	TMN2	347	15		10	1	1	0	0	0	0	0	0	0
chrIV	YDR110W	FOB1	209	13		1	0	1	1	1	0	0	0	0	0
chrIV	YDR111C	ALT2	371	19		5	1	0	0	1	0	1	0	0	0
chrIV	YDR113C	PDS1	126	3		3	0	0	0	0	0	0	0	0	0
chrIV	YDR115W		262	18		3	1	3	1	0	0	0	0	0	0
chrIV	YDR116C	MRPL1	127	8		5	0	1	0	0	0	0	0	0	0
chrIV	YDR117C	TMA64	211	11		4	2	1	0	0	0	0	0	0	0
chrIV	YDR118W	APC4	337	12		3	1	1	1	0	0	0	0	0	0
chrIV	YDR121W	DPB4	113	3		1	1	0	0	0	0	0	0	0	0
chrIV	YDR122W	KIN1	167	9		0	3	1	0	0	0	0	0	0	0
chrIV	YDR126W	SWF1	347	10		5	1	1	0	0	0	0	0	0	0
chrIV	YDR127W	ARO1	157	20		4	4	1	0	1	0	0	0	0	0
chrIV	YDR128W	MTC5	295	16		6	2	0	0	0	1	0	0	0	0
chrIV	YDR129C	SAC6	152	4		2	1	0	0	0	0	0	0	0	0
chrIV	YDR130C	FIN1	270	13		4	1	1	1	0	0	0	0	0	0
chrIV	YDR132C		225	15		6	2	0	0	1	0	0	0	0	0
chrIV	YDR135C	YCF1	108	7		0	0	1	1	0	0	0	0	0	0
chrIV	YDR137W	RGP1	200	12		5	2	1	0	0	0	0	0	0	0
chrIV	YDR139C	RUB1	205	9		1	2	0	1	0	0	0	0	0	0
chrIV	YDR140W	MTQ2	302	24		9	1	1	1	0	1	0	0	0	0
chrIV	YDR141C	DOP1	289	25		9	1	3	0	1	0	0	0	0	0
chrIV	YDR142C	PEX7	143	10		2	2	0	1	0	0	0	0	0	0
chrIV	YDR144C	MKC7	390	13		11	1	0	0	0	0	0	0	0	0
chrIV	YDR145W	TAF12	199	12		5	0	1	1	0	0	0	0	0	0
chrIV	YDR148C	KGD2	284	13		2	1	0	0	0	0	0	0	1	0
chrIV	YDR150W	NUM1	69	6		2	2	0	0	0	0	0	0	0	0
chrIV	YDR151C	CTH1	278	8		4	2	0	0	0	0	0	0	0	0
chrIV	YDR152W	GIR2	117	19		4	0	1	0	1	0	1	0	0	0
chrIV	YDR153C	ENT5	122	7		1	0	2	0	0	0	0	0	0	0
chrIV	YDR155C	CPR1	121	5		1	2	0	0	0	0	0	0	0	0
chrIV	YDR156W	RPA14	116	6		2	2	0	0	0	0	0	0	0	0
chrIV	YDR158W	HOM2	174	10		3	2	1	0	0	0	0	0	0	0
chrIV	YDR159W	SAC3	52	6		0	0	0	0	0	1	0	0	0	0
chrIV	YDR161W		211	17		6	2	1	1	0	0	0	0	0	0
chrIV	YDR163W	CWC15	118	3		3	0	0	0	0	0	0	0	0	0
chrIV	YDR164C	SEC1	285	11		4	1	0	0	1	0	0	0	0	0
chrIV	YDR165W	TRM82	88	7		1	3	0	0	0	0	0	0	0	0
chrIV	YDR167W	TAF10	122	10		0	1	1	0	1	0	0	0	0	0
chrIV	YDR169C	STB3	400	12		7	1	1	0	0	0	0	0	0	0
chrIV	YDR170C	SEC7	229	5		1	2	0	0	0	0	0	0	0	0
chrIV	YDR171W	HSP42	83	6		0	0	2	0	0	0	0	0	0	0
chrIV	YDR172W	SUP35	178	8		2	3	0	0	0	0	0	0	0	0
chrIV	YDR174W	HMO1	227	3		3	0	0	0	0	0	0	0	0	0
chrIV	YDR176W	NGG1	332	12		0	4	0	1	0	0	0	0	0	0
chrIV	YDR177W	UBC1	153	15		9	1	0	1	0	0	0	0	0	0
chrIV	YDR178W	SDH4	204	12		1	4	1	0	0	0	0	0	0	0
chrIV	YDR179C	CSN9	138	3		3	0	0	0	0	0	0	0	0	0
chrIV	YDR179W-A		163	4		4	0	0	0	0	0	0	0	0	0
chrIV	YDR181C	SAS4	263	14		5	2	0	0	1	0	0	0	0	0
chrIV	YDR182W	CDC1	161	18		5	3	1	1	0	0	0	0	0	0
chrIV	YDR184C	ATC1	237	14		8	3	0	0	0	0	0	0	0	0
chrIV	YDR185C	UPS3	207	14		3	1	0	0	0	0	0	0	1	0
chrIV	YDR186C		135	7		4	0	1	0	0	0	0	0	0	0
chrIV	YDR188W	CCT6	191	10		2	1	0	0	0	1	0	0	0	0
chrIV	YDR190C	RVB1	316	23		10	5	1	0	0	0	0	0	0	0
chrIV	YDR194C	MSS116	160	8		2	0	0	0	0	1	0	0	0	0
chrIV	YDR195W	REF2	87	6		1	1	1	0	0	0	0	0	0	0
chrIV	YDR196C	CAB5	96	7		0	0	0	0	0	0	1	0	0	0
chrIV	YDR197W	CBS2	374	13		8	1	1	0	0	0	0	0	0	0
chrIV	YDR198C	RKM2	193	15		11	0	0	1	0	0	0	0	0	0
chrIV	YDR200C	VPS64	332	8		3	0	0	0	1	0	0	0	0	0
chrIV	YDR201W	SPC19	233	16		3	2	3	0	0	0	0	0	0	0
chrIV	YDR202C	RAV2	138	18		4	2	2	1	0	0	0	0	0	0
chrIV	YDR204W	COQ4	140	3		1	1	0	0	0	0	0	0	0	0
chrIV	YDR205W	MSC2	270	19		3	4	0	2	0	0	0	0	0	0
chrIV	YDR206W	EBS1	233	14		11	0	1	0	0	0	0	0	0	0
chrIV	YDR207C	UME6	242	11		5	3	0	0	0	0	0	0	0	0
chrIV	YDR208W	MSS4	135	8		6	1	0	0	0	0	0	0	0	0
chrIV	YDR210W		400	13		4	1	1	1	0	0	0	0	0	0
chrIV	YDR212W	TCP1	96	5		1	2	0	0	0	0	0	0	0	0
chrIV	YDR214W	AHA1	98	6		1	0	0	0	1	0	0	0	0	0
chrIV	YDR219C	MFB1	222	9		1	2	0	1	0	0	0	0	0	0
chrIV	YDR221W	GTB1	288	19		5	2	2	1	0	0	0	0	0	0
chrIV	YDR224C	HTB1	127	2		0	1	0	0	0	0	0	0	0	0
chrIV	YDR225W	HTA1	182	8		1	0	1	1	0	0	0	0	0	0
chrIV	YDR226W	ADK1	135	2		2	0	0	0	0	0	0	0	0	0
chrIV	YDR228C	PCF11	83	3		3	0	0	0	0	0	0	0	0	0
chrIV	YDR231C	COX20	294	10		5	1	1	0	0	0	0	0	0	0
chrIV	YDR232W	HEM1	186	3		3	0	0	0	0	0	0	0	0	0
chrIV	YDR233C	RTN1	164	5		5	0	0	0	0	0	0	0	0	0
chrIV	YDR234W	LYS4	116	6		4	1	0	0	0	0	0	0	0	0
chrIV	YDR235W	PRP42	93	6		2	2	0	0	0	0	0	0	0	0
chrIV	YDR236C	FMN1	111	5		0	1	1	0	0	0	0	0	0	0
chrIV	YDR237W	MRPL7	194	5		3	1	0	0	0	0	0	0	0	0
chrIV	YDR238C	SEC26	195	8		5	0	1	0	0	0	0	0	0	0
chrIV	YDR239C		80	7		0	2	1	0	0	0	0	0	0	0
chrIV	YDR240C	SNU56	65	7		0	0	0	0	0	0	1	0	0	0
chrIV	YDR242W	AMD2	167	11		3	2	0	1	0	0	0	0	0	0
chrIV	YDR244W	PEX5	197	8		1	1	0	0	1	0	0	0	0	0
chrIV	YDR245W	MNN10	161	8		0	2	0	1	0	0	0	0	0	0
chrIV	YDR246W	TRS23	209	14		4	0	0	0	0	0	0	0	0	1
chrIV	YDR247W	VHS1	390	8		2	3	0	0	0	0	0	0	0	0
chrIV	YDR248C		109	9		3	1	0	1	0	0	0	0	0	0
chrIV	YDR249C		246	6		4	1	0	0	0	0	0	0	0	0
chrIV	YDR251W	PAM1	175	2		2	0	0	0	0	0	0	0	0	0
chrIV	YDR257C	RKM4	315	4		2	1	0	0	0	0	0	0	0	0
chrIV	YDR259C	YAP6	335	23		7	5	0	0	0	1	0	0	0	0
chrIV	YDR260C	SWM1	400	11		3	0	0	2	0	0	0	0	0	0
chrIV	YDR261C	EXG2	139	8		2	0	2	0	0	0	0	0	0	0
chrIV	YDR262W		203	9		5	2	0	0	0	0	0	0	0	0
chrIV	YDR264C	AKR1	276	4		4	0	0	0	0	0	0	0	0	0
chrIV	YDR265W	PEX10	262	9		7	1	0	0	0	0	0	0	0	0
chrIV	YDR266C	HEL2	140	14		5	1	0	0	0	0	1	0	0	0
chrIV	YDR267C	CIA1	155	7		1	0	2	0	0	0	0	0	0	0
chrIV	YDR268W	MSW1	132	7		2	1	1	0	0	0	0	0	0	0
chrIV	YDR272W	GLO2	158	11		4	0	1	1	0	0	0	0	0	0
chrIV	YDR276C	PMP3	273	9		3	1	0	1	0	0	0	0	0	0
chrIV	YDR277C	MTH1	278	7		4	0	1	0	0	0	0	0	0	0
chrIV	YDR279W	RNH202	55	5		3	1	0	0	0	0	0	0	0	0
chrIV	YDR281C	PHM6	176	4		2	1	0	0	0	0	0	0	0	0
chrIV	YDR283C	GCN2	199	17		6	1	0	1	1	0	0	0	0	0
chrIV	YDR284C	DPP1	106	9		2	2	1	0	0	0	0	0	0	0
chrIV	YDR287W	INM2	377	10		2	0	0	0	0	0	0	1	0	0
chrIV	YDR288W	NSE3	182	12		5	2	1	0	0	0	0	0	0	0
chrIV	YDR289C	RTT103	207	6		2	2	0	0	0	0	0	0	0	0
chrIV	YDR292C	SRP101	200	17		5	4	0	1	0	0	0	0	0	0
chrIV	YDR293C	SSD1	325	9		5	2	0	0	0	0	0	0	0	0
chrIV	YDR294C	DPL1	67	8		3	1	1	0	0	0	0	0	0	0
chrIV	YDR295C	HDA2	159	6		2	0	0	1	0	0	0	0	0	0
chrIV	YDR296W	MHR1	128	3		3	0	0	0	0	0	0	0	0	0
chrIV	YDR297W	SUR2	178	10		3	2	1	0	0	0	0	0	0	0
chrIV	YDR298C	ATP5	179	7		2	0	0	0	1	0	0	0	0	0
chrIV	YDR299W	BFR2	264	16		4	0	2	0	0	1	0	0	0	0
chrIV	YDR300C	PRO1	111	3		1	1	0	0	0	0	0	0	0	0
chrIV	YDR301W	CFT1	145	13		3	2	2	0	0	0	0	0	0	0
chrIV	YDR302W	GPI11	78	6		3	0	1	0	0	0	0	0	0	0
chrIV	YDR304C	CPR5	75	4		0	0	0	1	0	0	0	0	0	0
chrIV	YDR305C	HNT2	79	9		2	0	0	0	0	0	1	0	0	0
chrIV	YDR306C		337	16		9	0	1	1	0	0	0	0	0	0
chrIV	YDR307W	PMT7	150	15		1	0	0	0	0	1	0	1	0	0
chrIV	YDR308C	SRB7	174	11		1	5	0	0	0	0	0	0	0	0
chrIV	YDR309C	GIC2	389	12		3	3	1	0	0	0	0	0	0	0
chrIV	YDR310C	SUM1	220	8		1	2	1	0	0	0	0	0	0	0
chrIV	YDR311W	TFB1	100	2		0	1	0	0	0	0	0	0	0	0
chrIV	YDR313C	PIB1	204	8		0	4	0	0	0	0	0	0	0	0
chrIV	YDR314C	RAD34	306	20		4	3	1	0	0	0	1	0	0	0
chrIV	YDR318W	MCM21	154	17		8	3	1	0	0	0	0	0	0	0
chrIV	YDR319C	YFT2	384	15		4	2	1	1	0	0	0	0	0	0
chrIV	YDR320C-A	DAD4	92	7		1	0	0	0	0	1	0	0	0	0
chrIV	YDR321W	ASP1	157	11		5	3	0	0	0	0	0	0	0	0
chrIV	YDR322W	MRPL35	112	9		2	2	1	0	0	0	0	0	0	0
chrIV	YDR322C-A	TIM11	229	7		5	1	0	0	0	0	0	0	0	0
chrIV	YDR323C	PEP7	209	15		7	1	0	0	0	1	0	0	0	0
chrIV	YDR324C	UTP4	203	5		3	1	0	0	0	0	0	0	0	0
chrIV	YDR325W	YCG1	170	10		3	2	1	0	0	0	0	0	0	0
chrIV	YDR326C	YSP2	152	4		2	1	0	0	0	0	0	0	0	0
chrIV	YDR328C	SKP1	222	7		1	1	0	1	0	0	0	0	0	0
chrIV	YDR329C	PEX3	106	6		3	0	1	0	0	0	0	0	0	0
chrIV	YDR330W	UBX5	209	11		3	4	0	0	0	0	0	0	0	0
chrIV	YDR333C	RQC1	223	3		1	1	0	0	0	0	0	0	0	0
chrIV	YDR335W	MSN5	193	9		9	0	0	0	0	0	0	0	0	0
chrIV	YDR336W		98	3		1	1	0	0	0	0	0	0	0	0
chrIV	YDR339C	FCF1	147	22		5	1	1	0	1	0	1	0	0	0
chrIV	YDR341C		164	10		2	0	0	2	0	0	0	0	0	0
chrIV	YDR342C	HXT7	154	5		3	1	0	0	0	0	0	0	0	0
chrIV	YDR345C	HXT3	150	9		2	2	1	0	0	0	0	0	0	0
chrIV	YDR346C	SVF1	315	11		5	3	0	0	0	0	0	0	0	0
chrIV	YDR347W	MRP1	129	11		4	0	1	1	0	0	0	0	0	0
chrIV	YDR348C	PAL1	321	12		6	3	0	0	0	0	0	0	0	0
chrIV	YDR349C	YPS7	121	8		1	0	1	1	0	0	0	0	0	0
chrIV	YDR352W	YPQ2	293	15		4	1	3	0	0	0	0	0	0	0
chrIV	YDR353W	TRR1	253	13		4	0	3	0	0	0	0	0	0	0
chrIV	YDR354W	TRP4	81	12		5	2	1	0	0	0	0	0	0	0
chrIV	YDR356W	SPC110	395	18		3	2	0	1	0	0	1	0	0	0
chrIV	YDR357C	CNL1	132	23		5	1	1	1	0	0	0	0	1	0
chrIV	YDR359C	EAF1	183	6		2	2	0	0	0	0	0	0	0	0
chrIV	YDR361C	BCP1	265	11		7	2	0	0	0	0	0	0	0	0
chrIV	YDR362C	TFC6	333	13		7	3	0	0	0	0	0	0	0	0
chrIV	YDR363W	ESC2	372	17		10	1	0	0	1	0	0	0	0	0
chrIV	YDR363W-A	SEM1	272	17		4	0	1	0	2	0	0	0	0	0
chrIV	YDR365C	ESF1	124	7		4	0	1	0	0	0	0	0	0	0
chrIV	YDR367W	KEI1	102	14		4	1	1	0	1	0	0	0	0	0
chrIV	YDR368W	YPR1	172	5		1	2	0	0	0	0	0	0	0	0
chrIV	YDR372C	VPS74	146	6		1	0	0	0	1	0	0	0	0	0
chrIV	YDR374W-A	WIP1	284	10		6	2	0	0	0	0	0	0	0	0
chrIV	YDR375C	BCS1	75	3		1	1	0	0	0	0	0	0	0	0
chrIV	YDR376W	ARH1	131	5		3	1	0	0	0	0	0	0	0	0
chrIV	YDR377W	ATP17	397	18		13	1	1	0	0	0	0	0	0	0
chrIV	YDR378C	LSM6	211	13		3	5	0	0	0	0	0	0	0	0
chrIV	YDR379C-A		239	16		3	2	0	0	0	0	0	0	1	0
chrIV	YDR380W	ARO10	141	5		2	0	1	0	0	0	0	0	0	0
chrIV	YDR381W	YRA1	198	2		2	0	0	0	0	0	0	0	0	0
chrIV	YDR382W	RPP2B	166	2		2	0	0	0	0	0	0	0	0	0
chrIV	YDR384C	ATO3	160	5		0	0	0	0	1	0	0	0	0	0
chrIV	YDR385W	EFT2	205	3		1	1	0	0	0	0	0	0	0	0
chrIV	YDR386W	MUS81	109	3		0	0	1	0	0	0	0	0	0	0
chrIV	YDR388W	RVS167	123	2		0	1	0	0	0	0	0	0	0	0
chrIV	YDR389W	SAC7	310	14		10	0	0	1	0	0	0	0	0	0
chrIV	YDR390C	UBA2	109	14		3	1	0	1	1	0	0	0	0	0
chrIV	YDR391C		338	21		7	1	1	0	0	0	0	0	1	0
chrIV	YDR392W	SPT3	200	8		3	1	1	0	0	0	0	0	0	0
chrIV	YDR393W	SHE9	185	8		4	2	0	0	0	0	0	0	0	0
chrIV	YDR394W	RPT3	151	7		5	1	0	0	0	0	0	0	0	0
chrIV	YDR395W	SXM1	176	4		2	1	0	0	0	0	0	0	0	0
chrIV	YDR397C	NCB2	357	9		5	2	0	0	0	0	0	0	0	0
chrIV	YDR399W	HPT1	151	5		2	0	1	0	0	0	0	0	0	0
chrIV	YDR400W	URH1	215	6		4	1	0	0	0	0	0	0	0	0
chrIV	YDR404C	RPB7	168	8		4	0	0	1	0	0	0	0	0	0
chrIV	YDR408C	ADE8	190	18		10	2	0	1	0	0	0	0	0	0
chrIV	YDR409W	SIZ1	338	20		6	2	2	1	0	0	0	0	0	0
chrIV	YDR410C	STE14	111	7		4	0	1	0	0	0	0	0	0	0
chrIV	YDR411C	DFM1	75	5		3	1	0	0	0	0	0	0	0	0
chrIV	YDR412W	RRP17	169	4		4	0	0	0	0	0	0	0	0	0
chrIV	YDR415C		92	8		3	0	0	0	1	0	0	0	0	0
chrIV	YDR418W	RPL12B	103	10		4	1	0	1	0	0	0	0	0	0
chrIV	YDR419W	RAD30	387	7		2	1	1	0	0	0	0	0	0	0
chrIV	YDR420W	HKR1	201	5		5	0	0	0	0	0	0	0	0	0
chrIV	YDR421W	ARO80	270	7		3	0	0	1	0	0	0	0	0	0
chrIV	YDR422C	SIP1	314	6		3	0	1	0	0	0	0	0	0	0
chrIV	YDR423C	CAD1	194	10		2	0	0	0	0	0	0	1	0	0
chrIV	YDR424C	DYN2	50	6		0	0	0	0	0	1	0	0	0	0
chrIV	YDR427W	RPN9	114	10		3	2	1	0	0	0	0	0	0	0
chrIV	YDR428C	BNA7	344	14		6	2	0	1	0	0	0	0	0	0
chrIV	YDR429C	TIF35	154	9		4	0	0	0	1	0	0	0	0	0
chrIV	YDR430C	CYM1	90	13		2	1	0	1	1	0	0	0	0	0
chrIV	YDR432W	NPL3	400	25		11	1	2	0	0	1	0	0	0	0
chrIV	YDR434W	GPI17	132	6		6	0	0	0	0	0	0	0	0	0
chrIV	YDR438W	THI74	104	9		3	1	0	1	0	0	0	0	0	0
chrIV	YDR439W	LRS4	255	9		4	0	0	0	1	0	0	0	0	0
chrIV	YDR441C	APT2	309	11		6	1	1	0	0	0	0	0	0	0
chrIV	YDR447C	RPS17B	228	12		1	1	1	0	0	1	0	0	0	0
chrIV	YDR449C	UTP6	196	6		3	0	1	0	0	0	0	0	0	0
chrIV	YDR450W	RPS18A	122	6		3	0	1	0	0	0	0	0	0	0
chrIV	YDR451C	YHP1	212	4		0	2	0	0	0	0	0	0	0	0
chrIV	YDR452W	PPN1	188	10		1	0	3	0	0	0	0	0	0	0
chrIV	YDR453C	TSA2	87	5		1	0	0	1	0	0	0	0	0	0
chrIV	YDR454C	GUK1	130	5		3	1	0	0	0	0	0	0	0	0
chrIV	YDR456W	NHX1	110	5		1	2	0	0	0	0	0	0	0	0
chrIV	YDR457W	TOM1	97	9		3	3	0	0	0	0	0	0	0	0
chrIV	YDR458C	HEH2	209	2		2	0	0	0	0	0	0	0	0	0
chrIV	YDR459C	PFA5	107	16		2	3	1	0	1	0	0	0	0	0
chrIV	YDR460W	TFB3	142	11		1	5	0	0	0	0	0	0	0	0
chrIV	YDR461W	MFA1	159	6		0	1	0	1	0	0	0	0	0	0
chrIV	YDR461C-A		168	4		2	1	0	0	0	0	0	0	0	0
chrIV	YDR462W	MRPL28	128	4		1	0	1	0	0	0	0	0	0	0
chrIV	YDR463W	STP1	209	8		3	1	1	0	0	0	0	0	0	0
chrIV	YDR464W	SPP41	188	9		1	1	2	0	0	0	0	0	0	0
chrIV	YDR465C	RMT2	184	12		7	1	1	0	0	0	0	0	0	0
chrIV	YDR466W	PKH3	400	19		7	3	2	0	0	0	0	0	0	0
chrIV	YDR468C	TLG1	294	7		3	2	0	0	0	0	0	0	0	0
chrIV	YDR469W	SDC1	285	14		6	1	2	0	0	0	0	0	0	0
chrIV	YDR470C	UGO1	391	11		1	0	0	0	2	0	0	0	0	0
chrIV	YDR471W	RPL27B	129	5		3	1	0	0	0	0	0	0	0	0
chrIV	YDR472W	TRS31	262	16		6	3	0	1	0	0	0	0	0	0
chrIV	YDR475C	JIP4	127	18		4	2	0	0	0	0	0	0	0	1
chrIV	YDR476C		202	4		2	1	0	0	0	0	0	0	0	0
chrIV	YDR477W	SNF1	157	9		3	3	0	0	0	0	0	0	0	0
chrIV	YDR478W	SNM1	297	15		4	1	0	1	1	0	0	0	0	0
chrIV	YDR479C	PEX29	89	8		0	2	0	1	0	0	0	0	0	0
chrIV	YDR481C	PHO8	111	4		0	0	0	1	0	0	0	0	0	0
chrIV	YDR482C	CWC21	194	22		3	2	0	2	0	0	1	0	0	0
chrIV	YDR483W	KRE2	149	5		3	1	0	0	0	0	0	0	0	0
chrIV	YDR484W	VPS52	171	18		3	3	1	0	0	1	0	0	0	0
chrIV	YDR485C	VPS72	189	20		5	3	0	1	1	0	0	0	0	0
chrIV	YDR486C	VPS60	119	4		2	1	0	0	0	0	0	0	0	0
chrIV	YDR487C	RIB3	250	11		4	0	1	1	0	0	0	0	0	0
chrIV	YDR490C	PKH1	294	21		6	4	1	1	0	0	0	0	0	0
chrIV	YDR492W	IZH1	92	4		4	0	0	0	0	0	0	0	0	0
chrIV	YDR494W	RSM28	100	4		1	0	1	0	0	0	0	0	0	0
chrIV	YDR495C	VPS3	225	12		7	1	1	0	0	0	0	0	0	0
chrIV	YDR496C	PUF6	121	4		0	2	0	0	0	0	0	0	0	0
chrIV	YDR498C	SEC20	80	13		1	1	0	1	0	1	0	0	0	0
chrIV	YDR500C	RPL37B	114	9		2	0	1	1	0	0	0	0	0	0
chrIV	YDR501W	PLM2	240	13		6	1	0	0	1	0	0	0	0	0
chrIV	YDR502C	SAM2	304	7		3	2	0	0	0	0	0	0	0	0
chrIV	YDR503C	LPP1	212	9		2	1	0	0	1	0	0	0	0	0
chrIV	YDR504C	SPG3	237	8		1	0	0	0	0	0	1	0	0	0
chrIV	YDR507C	GIN4	184	6		1	1	1	0	0	0	0	0	0	0
chrIV	YDR508C	GNP1	240	7		2	1	1	0	0	0	0	0	0	0
chrIV	YDR510W	SMT3	216	14		1	1	1	2	0	0	0	0	0	0
chrIV	YDR512C	EMI1	111	12		1	3	0	0	1	0	0	0	0	0
chrIV	YDR513W	GRX2	105	8		0	1	0	0	0	1	0	0	0	0
chrIV	YDR516C	EMI2	126	7		3	2	0	0	0	0	0	0	0	0
chrIV	YDR517W	GRH1	184	13		7	0	2	0	0	0	0	0	0	0
chrIV	YDR518W	EUG1	61	4		1	0	1	0	0	0	0	0	0	0
chrIV	YDR519W	FPR2	310	16		8	1	2	0	0	0	0	0	0	0
chrIV	YDR524C	AGE1	352	13		3	3	0	1	0	0	0	0	0	0
chrIV	YDR524C-B		337	12		10	1	0	0	0	0	0	0	0	0
chrIV	YDR525W-A	SNA2	227	3		1	1	0	0	0	0	0	0	0	0
chrIV	YDR527W	RBA50	120	7		2	1	1	0	0	0	0	0	0	0
chrIV	YDR529C	QCR7	240	11		5	0	0	0	0	1	0	0	0	0
chrIV	YDR530C	APA2	153	10		3	0	1	1	0	0	0	0	0	0
chrIV	YDR531W	CAB1	101	9		1	1	0	0	0	1	0	0	0	0
chrIV	YDR533C	HSP31	251	5		3	1	0	0	0	0	0	0	0	0
chrIV	YDR534C	FIT1	235	6		4	1	0	0	0	0	0	0	0	0
chrIV	YDR538W	PAD1	289	10		6	0	0	1	0	0	0	0	0	0
chrIV	YDR539W	FDC1	93	4		2	1	0	0	0	0	0	0	0	0
chrV	YEL071W	DLD3	257	16		5	1	0	1	1	0	0	0	0	0
chrV	YEL068C		249	8		0	0	0	0	0	0	0	1	0	0
chrV	YEL066W	HPA3	338	10		3	0	1	1	0	0	0	0	0	0
chrV	YEL065W	SIT1	87	7		1	1	0	1	0	0	0	0	0	0
chrV	YEL064C	AVT2	249	5		5	0	0	0	0	0	0	0	0	0
chrV	YEL063C	CAN1	321	14		4	2	0	0	0	1	0	0	0	0
chrV	YEL062W	NPR2	219	4		4	0	0	0	0	0	0	0	0	0
chrV	YEL060C	PRB1	250	18		3	0	1	1	0	0	0	1	0	0
chrV	YEL059C-A	SOM1	68	4		2	1	0	0	0	0	0	0	0	0
chrV	YEL058W	PCM1	242	12		4	2	0	1	0	0	0	0	0	0
chrV	YEL056W	HAT2	184	16		6	2	0	0	0	1	0	0	0	0
chrV	YEL055C	POL5	190	8		4	2	0	0	0	0	0	0	0	0
chrV	YEL054C	RPL12A	256	10		5	0	0	0	1	0	0	0	0	0
chrV	YEL053C	MAK10	87	2		0	1	0	0	0	0	0	0	0	0
chrV	YEL052W	AFG1	68	5		1	2	0	0	0	0	0	0	0	0
chrV	YEL051W	VMA8	204	9		7	1	0	0	0	0	0	0	0	0
chrV	YEL050C	RML2	187	9		9	0	0	0	0	0	0	0	0	0
chrV	YEL046C	GLY1	157	6		3	0	1	0	0	0	0	0	0	0
chrV	YEL044W	IES6	114	8		4	2	0	0	0	0	0	0	0	0
chrV	YEL043W		125	12		4	0	1	0	1	0	0	0	0	0
chrV	YEL042W	GDA1	322	9		3	3	0	0	0	0	0	0	0	0
chrV	YEL040W	UTR2	172	15		5	1	0	0	0	0	0	1	0	0
chrV	YEL038W	UTR4	175	7		3	2	0	0	0	0	0	0	0	0
chrV	YEL037C	RAD23	177	5		3	1	0	0	0	0	0	0	0	0
chrV	YEL036C	ANP1	94	5		1	0	0	1	0	0	0	0	0	0
chrV	YEL034W	HYP2	217	2		2	0	0	0	0	0	0	0	0	0
chrV	YEL032W	MCM3	227	11		3	2	0	1	0	0	0	0	0	0
chrV	YEL031W	SPF1	158	18		4	3	0	2	0	0	0	0	0	0
chrV	YEL030W	ECM10	370	13		8	1	1	0	0	0	0	0	0	0
chrV	YEL029C	BUD16	384	13		6	2	1	0	0	0	0	0	0	0
chrV	YEL027W	VMA3	275	4		1	0	1	0	0	0	0	0	0	0
chrV	YEL026W	SNU13	74	3		0	0	1	0	0	0	0	0	0	0
chrV	YEL022W	GEA2	105	9		2	0	1	1	0	0	0	0	0	0
chrV	YEL020W-A	TIM9	116	5		3	1	0	0	0	0	0	0	0	0
chrV	YEL017C-A	PMP2	382	20		2	0	1	1	0	0	0	0	0	1
chrV	YEL017W	GTT3	97	6		0	0	2	0	0	0	0	0	0	0
chrV	YEL016C	NPP2	209	19		4	1	0	2	1	0	0	0	0	0
chrV	YEL015W	EDC3	169	13		8	1	1	0	0	0	0	0	0	0
chrV	YEL012W	UBC8	113	7		1	1	0	1	0	0	0	0	0	0
chrV	YEL011W	GLC3	118	8		1	0	1	1	0	0	0	0	0	0
chrV	YEL009C	GCN4	95	2		2	0	0	0	0	0	0	0	0	0
chrV	YEL007W	MIT1	162	11		0	1	1	0	0	1	0	0	0	0
chrV	YEL006W	YEA6	391	16		5	1	3	0	0	0	0	0	0	0
chrV	YEL005C	VAB2	112	2		2	0	0	0	0	0	0	0	0	0
chrV	YEL004W	YEA4	350	23		7	3	2	1	0	0	0	0	0	0
chrV	YEL003W	GIM4	137	11		2	1	1	1	0	0	0	0	0	0
chrV	YEL002C	WBP1	159	11		5	3	0	0	0	0	0	0	0	0
chrV	YEL001C	IRC22	250	6		1	1	1	0	0	0	0	0	0	0
chrV	YER001W	MNN1	299	12		4	2	0	1	0	0	0	0	0	0
chrV	YER002W	NOP16	107	7		1	0	0	0	0	1	0	0	0	0
chrV	YER003C	PMI40	274	17		8	3	1	0	0	0	0	0	0	0
chrV	YER004W	FMP52	261	4		1	0	1	0	0	0	0	0	0	0
chrV	YER005W	YND1	298	9		4	0	0	0	1	0	0	0	0	0
chrV	YER006W	NUG1	114	11		7	2	0	0	0	0	0	0	0	0
chrV	YER007C-A	TMA20	189	8		3	1	1	0	0	0	0	0	0	0
chrV	YER008C	SEC3	105	9		7	1	0	0	0	0	0	0	0	0
chrV	YER009W	NTF2	195	15		3	0	1	0	0	0	0	0	1	0
chrV	YER010C		129	12		5	2	1	0	0	0	0	0	0	0
chrV	YER011W	TIR1	270	13		3	0	1	0	0	0	1	0	0	0
chrV	YER012W	PRE1	163	12		2	1	0	2	0	0	0	0	0	0
chrV	YER018C	SPC25	107	4		1	0	1	0	0	0	0	0	0	0
chrV	YER019W	ISC1	97	7		3	0	0	1	0	0	0	0	0	0
chrV	YER019C-A	SBH2	139	5		2	0	1	0	0	0	0	0	0	0
chrV	YER020W	GPA2	290	3		1	1	0	0	0	0	0	0	0	0
chrV	YER021W	RPN3	130	14		1	2	0	1	1	0	0	0	0	0
chrV	YER022W	SRB4	99	2		0	1	0	0	0	0	0	0	0	0
chrV	YER023W	PRO3	79	5		1	2	0	0	0	0	0	0	0	0
chrV	YER025W	GCD11	293	8		3	0	0	0	1	0	0	0	0	0
chrV	YER026C	CHO1	134	12		2	1	0	2	0	0	0	0	0	0
chrV	YER027C	GAL83	297	13		5	2	0	1	0	0	0	0	0	0
chrV	YER028C	MIG3	62	3		1	1	0	0	0	0	0	0	0	0
chrV	YER029C	SMB1	115	12		3	3	1	0	0	0	0	0	0	0
chrV	YER030W	CHZ1	208	20		3	3	1	2	0	0	0	0	0	0
chrV	YER031C	YPT31	210	13		3	0	0	1	0	1	0	0	0	0
chrV	YER032W	FIR1	273	9		4	1	1	0	0	0	0	0	0	0
chrV	YER034W		268	9		3	0	2	0	0	0	0	0	0	0
chrV	YER035W	EDC2	312	8		4	0	0	1	0	0	0	0	0	0
chrV	YER036C	ARB1	245	13		4	0	1	0	0	1	0	0	0	0
chrV	YER037W	PHM8	223	4		1	0	1	0	0	0	0	0	0	0
chrV	YER042W	MXR1	212	14		4	2	2	0	0	0	0	0	0	0
chrV	YER043C	SAH1	235	4		1	0	1	0	0	0	0	0	0	0
chrV	YER044C	ERG28	168	15		3	1	2	1	0	0	0	0	0	0
chrV	YER047C	SAP1	253	18		6	2	0	0	0	0	0	1	0	0
chrV	YER048C	CAJ1	201	8		8	0	0	0	0	0	0	0	0	0
chrV	YER048W-A	ISD11	357	11		1	2	2	0	0	0	0	0	0	0
chrV	YER049W	TPA1	97	5		2	0	1	0	0	0	0	0	0	0
chrV	YER050C	RSM18	161	7		7	0	0	0	0	0	0	0	0	0
chrV	YER052C	HOM3	167	9		4	1	1	0	0	0	0	0	0	0
chrV	YER053C	PIC2	159	13		1	1	1	0	0	0	1	0	0	0
chrV	YER055C	HIS1	132	8		3	1	1	0	0	0	0	0	0	0
chrV	YER056C	FCY2	204	10		5	0	0	0	1	0	0	0	0	0
chrV	YER056C-A	RPL34A	98	4		1	0	1	0	0	0	0	0	0	0
chrV	YER057C	HMF1	93	3		1	1	0	0	0	0	0	0	0	0
chrV	YER058W	PET117	185	19		6	1	0	1	0	0	1	0	0	0
chrV	YER059W	PCL6	160	12		5	2	1	0	0	0	0	0	0	0
chrV	YER060W	FCY21	356	31		10	7	1	1	0	0	0	0	0	0
chrV	YER061C	CEM1	62	6		1	0	0	0	1	0	0	0	0	0
chrV	YER062C	GPP2	192	10		4	3	0	0	0	0	0	0	0	0
chrV	YER063W	THO1	209	5		5	0	0	0	0	0	0	0	0	0
chrV	YER064C	VHR2	261	9		2	0	1	1	0	0	0	0	0	0
chrV	YER067W	RGI1	98	3		1	1	0	0	0	0	0	0	0	0
chrV	YER069W	ARG5,6	161	11		2	0	0	1	1	0	0	0	0	0
chrV	YER070W	RNR1	224	20		7	2	0	1	1	0	0	0	0	0
chrV	YER071C	TDA2	243	13		6	2	1	0	0	0	0	0	0	0
chrV	YER072W	VTC1	161	10		3	1	0	0	1	0	0	0	0	0
chrV	YER073W	ALD5	281	10		2	1	0	0	0	1	0	0	0	0
chrV	YER074W	RPS24A	154	12		1	1	1	0	0	1	0	0	0	0
chrV	YER074W-A	YOS1	307	16		4	1	1	0	0	0	1	0	0	0
chrV	YER075C	PTP3	163	11		5	1	0	1	0	0	0	0	0	0
chrV	YER076C		158	3		3	0	0	0	0	0	0	0	0	0
chrV	YER080W	AIM9	336	13		3	0	0	0	2	0	0	0	0	0
chrV	YER083C	GET2	48	3		3	0	0	0	0	0	0	0	0	0
chrV	YER086W	ILV1	164	23		11	1	0	1	0	1	0	0	0	0
chrV	YER087C-B	SBH1	236	10		6	0	0	1	0	0	0	0	0	0
chrV	YER088C	DOT6	140	2		2	0	0	0	0	0	0	0	0	0
chrV	YER089C	PTC2	105	11		4	0	0	0	0	0	1	0	0	0
chrV	YER090W	TRP2	105	4		1	0	1	0	0	0	0	0	0	0
chrV	YER091C	MET6	245	4		2	1	0	0	0	0	0	0	0	0
chrV	YER092W	IES5	309	25		6	5	0	0	0	0	0	0	1	0
chrV	YER093C	TSC11	186	17		2	0	0	0	1	0	0	0	0	1
chrV	YER094C	PUP3	162	4		2	1	0	0	0	0	0	0	0	0
chrV	YER095W	RAD51	370	15		6	3	1	0	0	0	0	0	0	0
chrV	YER100W	UBC6	111	6		1	1	1	0	0	0	0	0	0	0
chrV	YER101C	AST2	151	8		1	0	1	1	0	0	0	0	0	0
chrV	YER102W	RPS8B	160	12		5	1	0	0	1	0	0	0	0	0
chrV	YER103W	SSA4	172	9		7	1	0	0	0	0	0	0	0	0
chrV	YER104W	RTT105	397	11		6	1	1	0	0	0	0	0	0	0
chrV	YER105C	NUP157	286	15		12	0	1	0	0	0	0	0	0	0
chrV	YER107C	GLE2	136	6		0	1	0	1	0	0	0	0	0	0
chrV	YER110C	KAP123	152	10		4	0	2	0	0	0	0	0	0	0
chrV	YER114C	BOI2	329	12		7	1	1	0	0	0	0	0	0	0
chrV	YER115C	SPR6	132	9		3	1	0	1	0	0	0	0	0	0
chrV	YER117W	RPL23B	194	17		5	6	0	0	0	0	0	0	0	0
chrV	YER118C	SHO1	289	10		3	2	1	0	0	0	0	0	0	0
chrV	YER119C	AVT6	106	7		3	0	0	1	0	0	0	0	0	0
chrV	YER120W	SCS2	235	13		6	1	0	0	1	0	0	0	0	0
chrV	YER122C	GLO3	158	15		4	0	0	0	1	1	0	0	0	0
chrV	YER123W	YCK3	393	10		3	2	1	0	0	0	0	0	0	0
chrV	YER124C	DSE1	383	7		3	2	0	0	0	0	0	0	0	0
chrV	YER125W	RSP5	397	4		1	0	1	0	0	0	0	0	0	0
chrV	YER126C	NSA2	208	16		5	1	0	1	1	0	0	0	0	0
chrV	YER127W	LCP5	198	12		6	3	0	0	0	0	0	0	0	0
chrV	YER131W	RPS26B	142	5		1	2	0	0	0	0	0	0	0	0
chrV	YER134C		293	13		6	2	1	0	0	0	0	0	0	0
chrV	YER136W	GDI1	331	7		0	1	0	0	1	0	0	0	0	0
chrV	YER138W-A		309	3		3	0	0	0	0	0	0	0	0	0
chrV	YER140W	EMP65	393	17		8	3	1	0	0	0	0	0	0	0
chrV	YER141W	COX15	257	9		5	2	0	0	0	0	0	0	0	0
chrV	YER143W	DDI1	217	10		6	2	0	0	0	0	0	0	0	0
chrV	YER144C	UBP5	316	13		5	1	2	0	0	0	0	0	0	0
chrV	YER145C	FTR1	177	8		4	2	0	0	0	0	0	0	0	0
chrV	YER146W	LSM5	90	4		1	0	1	0	0	0	0	0	0	0
chrV	YER148W	SPT15	249	11		0	2	1	1	0	0	0	0	0	0
chrV	YER150W	SPI1	173	20		2	4	1	0	0	0	1	0	0	0
chrV	YER151C	UBP3	81	5		2	0	1	0	0	0	0	0	0	0
chrV	YER152C		50	5		1	2	0	0	0	0	0	0	0	0
chrV	YER154W	OXA1	125	7		3	2	0	0	0	0	0	0	0	0
chrV	YER155C	BEM2	165	7		2	1	1	0	0	0	0	0	0	0
chrV	YER156C		121	8		1	2	1	0	0	0	0	0	0	0
chrV	YER157W	COG3	44	7		2	0	0	0	1	0	0	0	0	0
chrV	YER159C	BUR6	172	17		1	1	2	0	0	0	0	1	0	0
chrV	YER161C	SPT2	271	4		0	0	0	1	0	0	0	0	0	0
chrV	YER162C	RAD4	217	8		5	0	1	0	0	0	0	0	0	0
chrV	YER163C	GCG1	125	10		2	2	0	1	0	0	0	0	0	0
chrV	YER164W	CHD1	132	9		1	1	0	0	0	1	0	0	0	0
chrV	YER165W	PAB1	202	13		6	2	1	0	0	0	0	0	0	0
chrV	YER166W	DNF1	216	10		4	0	0	0	0	1	0	0	0	0
chrV	YER168C	CCA1	66	6		1	0	0	0	1	0	0	0	0	0
chrV	YER169W	RPH1	206	4		0	2	0	0	0	0	0	0	0	0
chrV	YER170W	ADK2	388	13		3	1	0	0	0	0	0	1	0	0
chrV	YER171W	RAD3	129	8		2	0	2	0	0	0	0	0	0	0
chrV	YER172C	BRR2	130	6		1	1	1	0	0	0	0	0	0	0
chrV	YER174C	GRX4	135	6		2	2	0	0	0	0	0	0	0	0
chrV	YER175C	TMT1	379	16		5	4	1	0	0	0	0	0	0	0
chrV	YER176W	ECM32	114	3		3	0	0	0	0	0	0	0	0	0
chrV	YER177W	BMH1	202	9		4	1	1	0	0	0	0	0	0	0
chrV	YER178W	PDA1	147	7		2	0	0	0	1	0	0	0	0	0
chrV	YER183C	FAU1	96	5		2	0	1	0	0	0	0	0	0	0
chrV	YER186C		236	13		10	0	1	0	0	0	0	0	0	0
chrVI	YFL057C	AAD16	124	9		6	0	1	0	0	0	0	0	0	0
chrVI	YFL054C		72	5		1	0	0	1	0	0	0	0	0	0
chrVI	YFL049W	SWP82	162	9		2	0	0	0	0	0	1	0	0	0
chrVI	YFL048C	EMP47	151	11		3	0	0	2	0	0	0	0	0	0
chrVI	YFL047W	RGD2	100	8		2	0	2	0	0	0	0	0	0	0
chrVI	YFL045C	SEC53	175	14		6	4	0	0	0	0	0	0	0	0
chrVI	YFL044C	OTU1	286	12		6	1	0	1	0	0	0	0	0	0
chrVI	YFL042C		90	5		2	0	1	0	0	0	0	0	0	0
chrVI	YFL039C	ACT1	291	19		4	1	3	1	0	0	0	0	0	0
chrVI	YFL038C	YPT1	226	24		3	0	1	0	0	0	0	1	0	1
chrVI	YFL037W	TUB2	233	2		2	0	0	0	0	0	0	0	0	0
chrVI	YFL036W	RPO41	151	7		2	1	1	0	0	0	0	0	0	0
chrVI	YFL034C-B	MOB2	205	6		2	0	0	1	0	0	0	0	0	0
chrVI	YFL034C-A	RPL22B	85	10		3	1	0	0	1	0	0	0	0	0
chrVI	YFL034W		116	3		1	1	0	0	0	0	0	0	0	0
chrVI	YFL031W	HAC1	396	7		0	0	0	0	0	0	1	0	0	0
chrVI	YFL029C	CAK1	88	5		3	1	0	0	0	0	0	0	0	0
chrVI	YFL028C	CAF16	81	5		1	2	0	0	0	0	0	0	0	0
chrVI	YFL026W	STE2	285	22		5	4	0	1	1	0	0	0	0	0
chrVI	YFL024C	EPL1	388	5		0	1	1	0	0	0	0	0	0	0
chrVI	YFL023W	BUD27	132	14		4	0	1	0	0	0	1	0	0	0
chrVI	YFL022C	FRS2	115	5		0	1	1	0	0	0	0	0	0	0
chrVI	YFL018C	LPD1	95	5		2	0	1	0	0	0	0	0	0	0
chrVI	YFL017W-A	SMX2	103	8		4	2	0	0	0	0	0	0	0	0
chrVI	YFL017C	GNA1	198	6		6	0	0	0	0	0	0	0	0	0
chrVI	YFL016C	MDJ1	102	3		1	1	0	0	0	0	0	0	0	0
chrVI	YFL010C	WWM1	162	5		1	0	0	1	0	0	0	0	0	0
chrVI	YFL008W	SMC1	119	14		3	0	0	0	1	1	0	0	0	0
chrVI	YFL007W	BLM10	80	5		2	0	1	0	0	0	0	0	0	0
chrVI	YFL005W	SEC4	221	6		1	1	1	0	0	0	0	0	0	0
chrVI	YFL004W	VTC2	88	4		0	2	0	0	0	0	0	0	0	0
chrVI	YFL002C	SPB4	143	5		2	0	1	0	0	0	0	0	0	0
chrVI	YFR001W	LOC1	96	8		2	1	0	1	0	0	0	0	0	0
chrVI	YFR002W	NIC96	115	5		2	0	1	0	0	0	0	0	0	0
chrVI	YFR003C	YPI1	214	13		5	4	0	0	0	0	0	0	0	0
chrVI	YFR004W	RPN11	93	8		1	2	1	0	0	0	0	0	0	0
chrVI	YFR005C	SAD1	319	11		4	2	1	0	0	0	0	0	0	0
chrVI	YFR006W		93	4		2	1	0	0	0	0	0	0	0	0
chrVI	YFR009W	GCN20	216	16		4	0	2	0	0	1	0	0	0	0
chrVI	YFR010W	UBP6	97	3		0	0	1	0	0	0	0	0	0	0
chrVI	YFR014C	CMK1	229	10		4	3	0	0	0	0	0	0	0	0
chrVI	YFR015C	GSY1	186	6		2	2	0	0	0	0	0	0	0	0
chrVI	YFR016C		113	13		1	2	1	0	1	0	0	0	0	0
chrVI	YFR018C		170	2		2	0	0	0	0	0	0	0	0	0
chrVI	YFR019W	FAB1	94	15		2	0	0	1	0	0	0	0	1	0
chrVI	YFR021W	ATG18	110	6		0	1	0	1	0	0	0	0	0	0
chrVI	YFR024C-A	LSB3	255	7		4	0	1	0	0	0	0	0	0	0
chrVI	YFR025C	HIS2	143	8		4	2	0	0	0	0	0	0	0	0
chrVI	YFR026C	ULI1	79	5		0	1	1	0	0	0	0	0	0	0
chrVI	YFR029W	PTR3	72	5		1	2	0	0	0	0	0	0	0	0
chrVI	YFR030W	MET10	56	5		1	2	0	0	0	0	0	0	0	0
chrVI	YFR031C	SMC2	59	6		1	1	1	0	0	0	0	0	0	0
chrVI	YFR031C-A	RPL2A	263	19		7	4	0	1	0	0	0	0	0	0
chrVI	YFR032C-A	RPL29	102	3		0	0	1	0	0	0	0	0	0	0
chrVI	YFR033C	QCR6	156	15		6	0	1	0	0	1	0	0	0	0
chrVI	YFR037C	RSC8	162	10		7	0	1	0	0	0	0	0	0	0
chrVI	YFR038W	IRC5	109	5		1	2	0	0	0	0	0	0	0	0
chrVI	YFR042W	KEG1	113	8		2	0	2	0	0	0	0	0	0	0
chrVI	YFR044C	DUG1	174	8		4	0	0	1	0	0	0	0	0	0
chrVI	YFR045W		137	12		2	1	1	0	1	0	0	0	0	0
chrVI	YFR046C	CNN1	241	5		2	0	1	0	0	0	0	0	0	0
chrVI	YFR047C	BNA6	80	6		0	0	0	0	0	1	0	0	0	0
chrVI	YFR049W	YMR31	122	10		2	0	0	2	0	0	0	0	0	0
chrVI	YFR050C	PRE4	121	10		1	1	0	0	0	0	1	0	0	0
chrVI	YFR051C	RET2	81	6		1	0	0	0	1	0	0	0	0	0
chrVI	YFR052W	RPN12	207	20		6	0	2	2	0	0	0	0	0	0
chrVI	YFR053C	HXK1	172	6		1	1	1	0	0	0	0	0	0	0
chrVII	YGL263W	COS12	164	11		6	1	1	0	0	0	0	0	0	0
chrVII	YGL257C	MNT2	247	24		15	3	1	0	0	0	0	0	0	0
chrVII	YGL256W	ADH4	172	8		1	2	1	0	0	0	0	0	0	0
chrVII	YGL254W	FZF1	199	10		2	0	0	0	0	0	0	1	0	0
chrVII	YGL253W	HXK2	214	7		3	2	0	0	0	0	0	0	0	0
chrVII	YGL251C	HFM1	395	19		9	5	0	0	0	0	0	0	0	0
chrVII	YGL250W	RMR1	267	10		4	1	0	1	0	0	0	0	0	0
chrVII	YGL248W	PDE1	391	10		3	2	1	0	0	0	0	0	0	0
chrVII	YGL247W	BRR6	168	14		4	2	0	0	0	1	0	0	0	0
chrVII	YGL246C	RAI1	148	5		1	0	0	1	0	0	0	0	0	0
chrVII	YGL245W	GUS1	77	6		1	1	1	0	0	0	0	0	0	0
chrVII	YGL243W	TAD1	132	15		5	2	0	0	0	1	0	0	0	0
chrVII	YGL242C		212	10		1	1	1	1	0	0	0	0	0	0
chrVII	YGL241W	KAP114	152	6		2	2	0	0	0	0	0	0	0	0
chrVII	YGL238W	CSE1	110	5		1	2	0	0	0	0	0	0	0	0
chrVII	YGL237C	HAP2	332	22		11	3	0	0	1	0	0	0	0	0
chrVII	YGL236C	MTO1	75	9		5	2	0	0	0	0	0	0	0	0
chrVII	YGL234W	ADE5,7	110	10		3	0	1	1	0	0	0	0	0	0
chrVII	YGL233W	SEC15	63	2		0	1	0	0	0	0	0	0	0	0
chrVII	YGL232W	TAN1	75	4		1	0	1	0	0	0	0	0	0	0
chrVII	YGL231C	EMC4	117	15		7	1	2	0	0	0	0	0	0	0
chrVII	YGL229C	SAP4	261	24		6	3	1	1	1	0	0	0	0	0
chrVII	YGL228W	SHE10	164	9		0	1	0	0	0	0	1	0	0	0
chrVII	YGL227W	VID30	211	11		3	2	0	1	0	0	0	0	0	0
chrVII	YGL226C-A	OST5	152	6		1	0	0	0	1	0	0	0	0	0
chrVII	YGL226W	MTC3	88	22		1	1	1	1	0	0	0	0	0	1
chrVII	YGL225W	VRG4	125	5		0	1	1	0	0	0	0	0	0	0
chrVII	YGL223C	COG1	177	9		2	2	1	0	0	0	0	0	0	0
chrVII	YGL221C	NIF3	104	10		2	2	0	1	0	0	0	0	0	0
chrVII	YGL220W	FRA2	218	8		5	0	1	0	0	0	0	0	0	0
chrVII	YGL219C	MDM34	83	3		1	1	0	0	0	0	0	0	0	0
chrVII	YGL216W	KIP3	99	6		2	0	0	1	0	0	0	0	0	0
chrVII	YGL213C	SKI8	121	11		6	1	1	0	0	0	0	0	0	0
chrVII	YGL211W	NCS6	176	16		5	2	1	1	0	0	0	0	0	0
chrVII	YGL210W	YPT32	125	7		3	0	0	1	0	0	0	0	0	0
chrVII	YGL208W	SIP2	138	9		3	0	0	0	0	1	0	0	0	0
chrVII	YGL207W	SPT16	251	20		10	1	1	0	1	0	0	0	0	0
chrVII	YGL206C	CHC1	296	12		6	0	2	0	0	0	0	0	0	0
chrVII	YGL203C	KEX1	298	20		6	1	1	0	0	0	0	0	1	0
chrVII	YGL202W	ARO8	139	14		1	1	0	1	0	0	1	0	0	0
chrVII	YGL201C	MCM6	341	10		4	1	0	1	0	0	0	0	0	0
chrVII	YGL200C	EMP24	113	6		1	1	1	0	0	0	0	0	0	0
chrVII	YGL198W	YIP4	57	4		4	0	0	0	0	0	0	0	0	0
chrVII	YGL197W	MDS3	322	20		5	0	2	1	1	0	0	0	0	0
chrVII	YGL196W	DSD1	177	7		3	2	0	0	0	0	0	0	0	0
chrVII	YGL195W	GCN1	118	8		2	0	2	0	0	0	0	0	0	0
chrVII	YGL194C-A		239	23		10	1	0	0	0	0	0	0	0	1
chrVII	YGL194C	HOS2	133	7		2	0	0	0	1	0	0	0	0	0
chrVII	YGL193C		55	6		0	0	2	0	0	0	0	0	0	0
chrVII	YGL191W	COX13	271	13		7	0	0	0	0	1	0	0	0	0
chrVII	YGL190C	CDC55	298	11		4	2	1	0	0	0	0	0	0	0
chrVII	YGL189C	RPS26A	83	12		1	0	2	0	1	0	0	0	0	0
chrVII	YGL187C	COX4	311	12		3	2	0	0	1	0	0	0	0	0
chrVII	YGL186C	TPN1	54	4		4	0	0	0	0	0	0	0	0	0
chrVII	YGL185C		222	13		5	2	0	1	0	0	0	0	0	0
chrVII	YGL181W	GTS1	138	19		1	1	0	0	0	1	0	0	0	1
chrVII	YGL176C		118	8		4	0	0	1	0	0	0	0	0	0
chrVII	YGL173C	XRN1	239	13		4	3	1	0	0	0	0	0	0	0
chrVII	YGL172W	NUP49	114	7		1	0	2	0	0	0	0	0	0	0
chrVII	YGL171W	ROK1	157	7		3	0	0	1	0	0	0	0	0	0
chrVII	YGL169W	SUA5	225	13		7	1	0	1	0	0	0	0	0	0
chrVII	YGL167C	PMR1	206	8		2	1	0	1	0	0	0	0	0	0
chrVII	YGL166W	CUP2	210	11		1	2	2	0	0	0	0	0	0	0
chrVII	YGL164C	YRB30	270	10		3	2	1	0	0	0	0	0	0	0
chrVII	YGL163C	RAD54	189	8		4	2	0	0	0	0	0	0	0	0
chrVII	YGL161C	YIP5	152	15		2	2	0	1	1	0	0	0	0	0
chrVII	YGL159W		143	6		4	1	0	0	0	0	0	0	0	0
chrVII	YGL157W	ARI1	92	4		0	0	0	1	0	0	0	0	0	0
chrVII	YGL155W	CDC43	393	11		6	1	1	0	0	0	0	0	0	0
chrVII	YGL153W	PEX14	73	7		5	1	0	0	0	0	0	0	0	0
chrVII	YGL151W	NUT1	188	8		2	0	0	0	0	1	0	0	0	0
chrVII	YGL150C	INO80	253	27		9	1	1	0	1	0	0	1	0	0
chrVII	YGL148W	ARO2	115	6		3	0	1	0	0	0	0	0	0	0
chrVII	YGL147C	RPL9A	128	10		3	2	1	0	0	0	0	0	0	0
chrVII	YGL144C	ROG1	82	8		1	2	1	0	0	0	0	0	0	0
chrVII	YGL143C	MRF1	158	7		3	2	0	0	0	0	0	0	0	0
chrVII	YGL142C	GPI10	182	14		4	2	0	0	0	1	0	0	0	0
chrVII	YGL141W	HUL5	128	10		2	1	0	0	0	1	0	0	0	0
chrVII	YGL140C		322	21		7	1	1	1	1	0	0	0	0	0
chrVII	YGL137W	SEC27	393	22		9	5	1	0	0	0	0	0	0	0
chrVII	YGL135W	RPL1B	115	6		2	0	0	1	0	0	0	0	0	0
chrVII	YGL134W	PCL10	122	18		5	1	1	0	0	0	0	1	0	0
chrVII	YGL133W	ITC1	77	3		3	0	0	0	0	0	0	0	0	0
chrVII	YGL130W	CEG1	338	26		9	4	1	0	0	1	0	0	0	0
chrVII	YGL128C	CWC23	325	12		3	1	0	0	0	0	1	0	0	0
chrVII	YGL126W	SCS3	307	16		3	0	0	0	1	0	0	1	0	0
chrVII	YGL123W	RPS2	89	2		0	1	0	0	0	0	0	0	0	0
chrVII	YGL121C	GPG1	177	11		4	0	1	1	0	0	0	0	0	0
chrVII	YGL120C	PRP43	133	8		4	2	0	0	0	0	0	0	0	0
chrVII	YGL119W	COQ8	98	12		7	1	1	0	0	0	0	0	0	0
chrVII	YGL116W	CDC20	102	5		0	1	1	0	0	0	0	0	0	0
chrVII	YGL115W	SNF4	107	9		2	1	0	0	1	0	0	0	0	0
chrVII	YGL113W	SLD3	265	5		1	0	0	1	0	0	0	0	0	0
chrVII	YGL112C	TAF6	151	7		3	0	0	1	0	0	0	0	0	0
chrVII	YGL111W	NSA1	218	12		2	2	2	0	0	0	0	0	0	0
chrVII	YGL110C	CUE3	115	5		0	1	1	0	0	0	0	0	0	0
chrVII	YGL108C		252	10		1	3	1	0	0	0	0	0	0	0
chrVII	YGL107C	RMD9	143	11		3	0	1	0	1	0	0	0	0	0
chrVII	YGL106W	MLC1	260	18		3	1	1	0	2	0	0	0	0	0
chrVII	YGL105W	ARC1	127	6		2	2	0	0	0	0	0	0	0	0
chrVII	YGL103W	RPL28	87	8		0	1	0	0	0	1	0	0	0	0
chrVII	YGL101W		255	5		2	0	1	0	0	0	0	0	0	0
chrVII	YGL100W	SEH1	115	6		3	0	1	0	0	0	0	0	0	0
chrVII	YGL099W	LSG1	58	3		3	0	0	0	0	0	0	0	0	0
chrVII	YGL097W	SRM1	140	10		5	0	0	0	1	0	0	0	0	0
chrVII	YGL095C	VPS45	96	5		5	0	0	0	0	0	0	0	0	0
chrVII	YGL093W	SPC105	50	5		1	2	0	0	0	0	0	0	0	0
chrVII	YGL092W	NUP145	161	11		8	0	1	0	0	0	0	0	0	0
chrVII	YGL091C	NBP35	161	8		5	0	1	0	0	0	0	0	0	0
chrVII	YGL087C	MMS2	163	20		3	2	0	2	1	0	0	0	0	0
chrVII	YGL086W	MAD1	103	10		1	3	1	0	0	0	0	0	0	0
chrVII	YGL085W	LCL3	208	10		3	1	0	0	1	0	0	0	0	0
chrVII	YGL084C	GUP1	285	34		10	6	2	0	0	1	0	0	0	0
chrVII	YGL082W		179	13		4	0	3	0	0	0	0	0	0	0
chrVII	YGL081W		311	3		3	0	0	0	0	0	0	0	0	0
chrVII	YGL080W	FMP37	281	5		5	0	0	0	0	0	0	0	0	0
chrVII	YGL079W	KXD1	145	13		3	2	0	0	0	1	0	0	0	0
chrVII	YGL078C	DBP3	223	17		1	1	0	2	0	1	0	0	0	0
chrVII	YGL076C	RPL7A	121	11		1	2	0	0	0	1	0	0	0	0
chrVII	YGL075C	MPS2	368	9		4	1	1	0	0	0	0	0	0	0
chrVII	YGL073W	HSF1	63	3		1	1	0	0	0	0	0	0	0	0
chrVII	YGL070C	RPB9	255	7		2	1	1	0	0	0	0	0	0	0
chrVII	YGL068W	MNP1	218	7		1	1	0	1	0	0	0	0	0	0
chrVII	YGL067W	NPY1	41	4		0	0	0	1	0	0	0	0	0	0
chrVII	YGL066W	SGF73	368	20		8	3	2	0	0	0	0	0	0	0
chrVII	YGL065C	ALG2	59	3		0	0	1	0	0	0	0	0	0	0
chrVII	YGL064C	MRH4	160	19		5	1	0	0	1	0	1	0	0	0
chrVII	YGL063W	PUS2	350	4		0	0	0	1	0	0	0	0	0	0
chrVII	YGL062W	PYC1	59	6		0	0	2	0	0	0	0	0	0	0
chrVII	YGL061C	DUO1	242	6		6	0	0	0	0	0	0	0	0	0
chrVII	YGL060W	YBP2	279	11		4	1	0	0	1	0	0	0	0	0
chrVII	YGL059W	PKP2	122	7		2	0	0	0	1	0	0	0	0	0
chrVII	YGL058W	RAD6	220	2		0	1	0	0	0	0	0	0	0	0
chrVII	YGL055W	OLE1	289	12		5	1	0	0	1	0	0	0	0	0
chrVII	YGL053W	PRM8	146	2		2	0	0	0	0	0	0	0	0	0
chrVII	YGL050W	TYW3	215	5		3	1	0	0	0	0	0	0	0	0
chrVII	YGL048C	RPT6	112	9		1	0	0	0	0	0	0	1	0	0
chrVII	YGL047W	ALG13	45	5		2	0	1	0	0	0	0	0	0	0
chrVII	YGL044C	RNA15	284	9		3	0	0	0	0	1	0	0	0	0
chrVII	YGL043W	DST1	277	7		4	0	1	0	0	0	0	0	0	0
chrVII	YGL041W-A		209	21		1	2	1	0	1	0	0	1	0	0
chrVII	YGL040C	HEM2	225	10		0	0	0	1	0	1	0	0	0	0
chrVII	YGL039W		124	8		0	2	0	1	0	0	0	0	0	0
chrVII	YGL038C	OCH1	350	14		8	3	0	0	0	0	0	0	0	0
chrVII	YGL037C	PNC1	153	5		2	0	1	0	0	0	0	0	0	0
chrVII	YGL031C	RPL24A	132	12		5	1	0	0	1	0	0	0	0	0
chrVII	YGL030W	RPL30	105	7		2	1	1	0	0	0	0	0	0	0
chrVII	YGL029W	CGR1	241	23		2	1	1	1	0	0	0	0	0	1
chrVII	YGL028C	SCW11	313	9		7	1	0	0	0	0	0	0	0	0
chrVII	YGL027C	CWH41	91	5		0	0	0	0	1	0	0	0	0	0
chrVII	YGL026C	TRP5	113	11		3	0	0	0	0	0	0	1	0	0
chrVII	YGL025C	PGD1	85	3		3	0	0	0	0	0	0	0	0	0
chrVII	YGL023C	PIB2	157	8		3	1	1	0	0	0	0	0	0	0
chrVII	YGL022W	STT3	181	10		1	0	0	0	0	0	0	0	1	0
chrVII	YGL021W	ALK1	123	11		6	0	0	0	1	0	0	0	0	0
chrVII	YGL020C	GET1	88	14		2	0	0	1	0	0	0	1	0	0
chrVII	YGL019W	CKB1	127	16		0	0	0	0	0	0	1	0	1	0
chrVII	YGL018C	JAC1	266	7		2	1	1	0	0	0	0	0	0	0
chrVII	YGL017W	ATE1	154	29		4	1	3	1	2	0	0	0	0	0
chrVII	YGL016W	KAP122	192	6		3	0	1	0	0	0	0	0	0	0
chrVII	YGL014W	PUF4	93	14		3	0	2	0	1	0	0	0	0	0
chrVII	YGL013C	PDR1	99	7		1	3	0	0	0	0	0	0	0	0
chrVII	YGL012W	ERG4	111	6		1	1	1	0	0	0	0	0	0	0
chrVII	YGL011C	SCL1	197	4		4	0	0	0	0	0	0	0	0	0
chrVII	YGL009C	LEU1	197	12		3	1	1	1	0	0	0	0	0	0
chrVII	YGL008C	PMA1	104	5		3	1	0	0	0	0	0	0	0	0
chrVII	YGL006W	PMC1	133	11		5	1	0	1	0	0	0	0	0	0
chrVII	YGL004C	RPN14	129	10		5	1	1	0	0	0	0	0	0	0
chrVII	YGL003C	CDH1	259	10		8	1	0	0	0	0	0	0	0	0
chrVII	YGL002W	ERP6	263	12		6	1	0	1	0	0	0	0	0	0
chrVII	YGL001C	ERG26	197	4		4	0	0	0	0	0	0	0	0	0
chrVII	YGR003W	CUL3	295	11		5	3	0	0	0	0	0	0	0	0
chrVII	YGR004W	PEX31	261	5		3	1	0	0	0	0	0	0	0	0
chrVII	YGR005C	TFG2	117	7		1	3	0	0	0	0	0	0	0	0
chrVII	YGR007W	ECT1	159	8		2	1	0	1	0	0	0	0	0	0
chrVII	YGR008C	STF2	171	10		3	2	1	0	0	0	0	0	0	0
chrVII	YGR009C	SEC9	142	6		3	0	1	0	0	0	0	0	0	0
chrVII	YGR010W	NMA2	361	17		9	0	1	0	1	0	0	0	0	0
chrVII	YGR012W		89	9		1	1	2	0	0	0	0	0	0	0
chrVII	YGR013W	SNU71	311	11		5	3	0	0	0	0	0	0	0	0
chrVII	YGR014W	MSB2	134	7		4	0	1	0	0	0	0	0	0	0
chrVII	YGR017W		126	6		2	0	0	1	0	0	0	0	0	0
chrVII	YGR019W	UGA1	95	3		0	0	1	0	0	0	0	0	0	0
chrVII	YGR020C	VMA7	139	4		1	0	1	0	0	0	0	0	0	0
chrVII	YGR024C	THG1	94	8		1	2	1	0	0	0	0	0	0	0
chrVII	YGR026W		187	11		6	0	0	0	1	0	0	0	0	0
chrVII	YGR027C	RPS25A	88	5		3	1	0	0	0	0	0	0	0	0
chrVII	YGR028W	MSP1	251	21		7	0	2	2	0	0	0	0	0	0
chrVII	YGR029W	ERV1	111	3		1	1	0	0	0	0	0	0	0	0
chrVII	YGR030C	POP6	108	9		1	0	0	2	0	0	0	0	0	0
chrVII	YGR031W	IMO32	322	7		1	0	0	0	0	1	0	0	0	0
chrVII	YGR033C	TIM21	321	14		3	4	1	0	0	0	0	0	0	0
chrVII	YGR034W	RPL26B	183	12		5	2	1	0	0	0	0	0	0	0
chrVII	YGR037C	ACB1	301	12		6	0	2	0	0	0	0	0	0	0
chrVII	YGR038W	ORM1	186	19		9	2	2	0	0	0	0	0	0	0
chrVII	YGR041W	BUD9	208	23		11	2	0	2	0	0	0	0	0	0
chrVII	YGR044C	RME1	265	9		4	0	0	0	1	0	0	0	0	0
chrVII	YGR046W	TAM41	345	5		0	1	1	0	0	0	0	0	0	0
chrVII	YGR048W	UFD1	87	6		2	2	0	0	0	0	0	0	0	0
chrVII	YGR049W	SCM4	268	2		2	0	0	0	0	0	0	0	0	0
chrVII	YGR050C		372	11		7	0	0	1	0	0	0	0	0	0
chrVII	YGR054W		296	19		3	2	0	3	0	0	0	0	0	0
chrVII	YGR055W	MUP1	155	11		4	1	0	0	1	0	0	0	0	0
chrVII	YGR056W	RSC1	145	7		4	0	1	0	0	0	0	0	0	0
chrVII	YGR057C	LST7	353	7		3	2	0	0	0	0	0	0	0	0
chrVII	YGR060W	ERG25	345	11		6	1	1	0	0	0	0	0	0	0
chrVII	YGR061C	ADE6	98	11		1	0	0	1	0	1	0	0	0	0
chrVII	YGR062C	COX18	77	3		1	1	0	0	0	0	0	0	0	0
chrVII	YGR063C	SPT4	130	8		3	0	0	0	1	0	0	0	0	0
chrVII	YGR065C	VHT1	128	8		3	1	1	0	0	0	0	0	0	0
chrVII	YGR068C	ART5	398	8		1	0	0	0	0	0	1	0	0	0
chrVII	YGR074W	SMD1	300	4		1	0	1	0	0	0	0	0	0	0
chrVII	YGR077C	PEX8	81	8		2	1	0	1	0	0	0	0	0	0
chrVII	YGR078C	PAC10	83	14		0	1	0	0	0	0	0	0	0	1
chrVII	YGR079W		110	9		3	1	0	1	0	0	0	0	0	0
chrVII	YGR080W	TWF1	157	18		7	2	0	0	0	0	1	0	0	0
chrVII	YGR081C	SLX9	303	23		6	4	0	1	1	0	0	0	0	0
chrVII	YGR082W	TOM20	148	2		2	0	0	0	0	0	0	0	0	0
chrVII	YGR084C	MRP13	156	14		5	1	0	0	0	0	1	0	0	0
chrVII	YGR085C	RPL11B	131	11		2	3	1	0	0	0	0	0	0	0
chrVII	YGR086C	PIL1	354	20		13	2	1	0	0	0	0	0	0	0
chrVII	YGR088W	CTT1	148	17		3	0	2	0	0	0	0	1	0	0
chrVII	YGR089W	NNF2	130	5		1	0	0	1	0	0	0	0	0	0
chrVII	YGR090W	UTP22	149	10		4	1	0	1	0	0	0	0	0	0
chrVII	YGR091W	PRP31	172	7		5	1	0	0	0	0	0	0	0	0
chrVII	YGR092W	DBF2	276	7		7	0	0	0	0	0	0	0	0	0
chrVII	YGR094W	VAS1	95	7		1	0	0	0	0	1	0	0	0	0
chrVII	YGR095C	RRP46	167	13		7	0	0	0	0	1	0	0	0	0
chrVII	YGR097W	ASK10	286	13		7	1	0	1	0	0	0	0	0	0
chrVII	YGR098C	ESP1	324	14		8	3	0	0	0	0	0	0	0	0
chrVII	YGR099W	TEL2	79	5		1	0	0	1	0	0	0	0	0	0
chrVII	YGR100W	MDR1	151	14		4	2	0	0	0	1	0	0	0	0
chrVII	YGR101W	PCP1	175	13		8	0	0	0	1	0	0	0	0	0
chrVII	YGR102C	GTF1	182	23		3	3	2	2	0	0	0	0	0	0
chrVII	YGR103W	NOP7	212	15		5	0	0	1	0	1	0	0	0	0
chrVII	YGR104C	SRB5	145	15		3	1	2	1	0	0	0	0	0	0
chrVII	YGR106C	VOA1	104	6		3	0	1	0	0	0	0	0	0	0
chrVII	YGR108W	CLB1	196	11		3	1	0	0	0	1	0	0	0	0
chrVII	YGR111W		125	6		2	0	0	1	0	0	0	0	0	0
chrVII	YGR112W	SHY1	250	8		4	0	0	1	0	0	0	0	0	0
chrVII	YGR113W	DAM1	339	15		6	3	1	0	0	0	0	0	0	0
chrVII	YGR116W	SPT6	211	7		2	1	1	0	0	0	0	0	0	0
chrVII	YGR117C		273	16		2	1	2	0	0	1	0	0	0	0
chrVII	YGR118W	RPS23A	287	7		5	1	0	0	0	0	0	0	0	0
chrVII	YGR119C	NUP57	168	15		12	0	1	0	0	0	0	0	0	0
chrVII	YGR120C	COG2	191	10		6	2	0	0	0	0	0	0	0	0
chrVII	YGR122W		380	17		7	3	0	1	0	0	0	0	0	0
chrVII	YGR124W	ASN2	232	6		6	0	0	0	0	0	0	0	0	0
chrVII	YGR125W		168	11		2	0	3	0	0	0	0	0	0	0
chrVII	YGR128C	UTP8	123	7		4	0	1	0	0	0	0	0	0	0
chrVII	YGR129W	SYF2	278	6		4	1	0	0	0	0	0	0	0	0
chrVII	YGR130C		184	6		0	1	0	1	0	0	0	0	0	0
chrVII	YGR132C	PHB1	326	21		7	2	0	0	2	0	0	0	0	0
chrVII	YGR133W	PEX4	295	17		5	1	0	1	0	1	0	0	0	0
chrVII	YGR134W	CAF130	264	16		7	3	1	0	0	0	0	0	0	0
chrVII	YGR135W	PRE9	143	7		5	1	0	0	0	0	0	0	0	0
chrVII	YGR136W	LSB1	262	6		1	0	0	0	1	0	0	0	0	0
chrVII	YGR138C	TPO2	193	19		1	4	2	1	0	0	0	0	0	0
chrVII	YGR141W	VPS62	379	17		4	2	0	1	1	0	0	0	0	0
chrVII	YGR142W	BTN2	100	3		1	1	0	0	0	0	0	0	0	0
chrVII	YGR143W	SKN1	391	4		4	0	0	0	0	0	0	0	0	0
chrVII	YGR145W	ENP2	108	9		4	1	1	0	0	0	0	0	0	0
chrVII	YGR147C	NAT2	360	12		7	0	0	0	1	0	0	0	0	0
chrVII	YGR148C	RPL24B	156	12		1	2	1	1	0	0	0	0	0	0
chrVII	YGR149W		226	13		6	2	1	0	0	0	0	0	0	0
chrVII	YGR152C	RSR1	143	14		5	3	1	0	0	0	0	0	0	0
chrVII	YGR154C	GTO1	240	5		5	0	0	0	0	0	0	0	0	0
chrVII	YGR155W	CYS4	139	6		0	3	0	0	0	0	0	0	0	0
chrVII	YGR156W	PTI1	333	25		7	2	2	0	0	0	0	1	0	0
chrVII	YGR157W	CHO2	188	21		8	2	1	0	0	1	0	0	0	0
chrVII	YGR159C	NSR1	150	4		1	0	1	0	0	0	0	0	0	0
chrVII	YGR161C	RTS3	277	12		10	1	0	0	0	0	0	0	0	0
chrVII	YGR161W-C		358	26		8	3	0	0	0	2	0	0	0	0
chrVII	YGR162W	TIF4631	395	19		9	2	0	0	0	1	0	0	0	0
chrVII	YGR163W	GTR2	71	4		1	0	1	0	0	0	0	0	0	0
chrVII	YGR165W	MRPS35	177	6		3	0	1	0	0	0	0	0	0	0
chrVII	YGR167W	CLC1	167	12		2	0	1	0	0	0	1	0	0	0
chrVII	YGR169C-A		393	10		2	2	0	1	0	0	0	0	0	0
chrVII	YGR170W	PSD2	295	7		3	2	0	0	0	0	0	0	0	0
chrVII	YGR172C	YIP1	159	13		0	3	1	1	0	0	0	0	0	0
chrVII	YGR173W	RBG2	354	10		6	2	0	0	0	0	0	0	0	0
chrVII	YGR174C	CBP4	127	5		2	0	1	0	0	0	0	0	0	0
chrVII	YGR175C	ERG1	179	7		0	0	1	1	0	0	0	0	0	0
chrVII	YGR177C	ATF2	218	12		1	1	0	0	0	0	0	0	1	0
chrVII	YGR178C	PBP1	145	14		5	2	0	0	1	0	0	0	0	0
chrVII	YGR179C	OKP1	143	11		4	2	1	0	0	0	0	0	0	0
chrVII	YGR181W	TIM13	180	9		2	2	1	0	0	0	0	0	0	0
chrVII	YGR183C	QCR9	392	12		4	2	0	1	0	0	0	0	0	0
chrVII	YGR184C	UBR1	94	6		1	1	1	0	0	0	0	0	0	0
chrVII	YGR185C	TYS1	127	21		4	4	0	1	1	0	0	0	0	0
chrVII	YGR186W	TFG1	135	6		3	0	1	0	0	0	0	0	0	0
chrVII	YGR187C	HGH1	142	6		1	1	1	0	0	0	0	0	0	0
chrVII	YGR188C	BUB1	187	8		2	3	0	0	0	0	0	0	0	0
chrVII	YGR189C	CRH1	119	4		4	0	0	0	0	0	0	0	0	0
chrVII	YGR191W	HIP1	333	15		5	0	2	1	0	0	0	0	0	0
chrVII	YGR192C	TDH3	106	3		0	0	1	0	0	0	0	0	0	0
chrVII	YGR193C	PDX1	119	8		3	1	1	0	0	0	0	0	0	0
chrVII	YGR194C	XKS1	151	9		4	0	0	0	1	0	0	0	0	0
chrVII	YGR195W	SKI6	90	6		3	0	1	0	0	0	0	0	0	0
chrVII	YGR196C	FYV8	116	6		1	0	0	0	1	0	0	0	0	0
chrVII	YGR197C	SNG1	84	8		1	0	1	1	0	0	0	0	0	0
chrVII	YGR198W	YPP1	115	11		5	1	0	1	0	0	0	0	0	0
chrVII	YGR199W	PMT6	333	15		4	2	1	1	0	0	0	0	0	0
chrVII	YGR200C	ELP2	114	8		5	0	1	0	0	0	0	0	0	0
chrVII	YGR201C		68	4		0	2	0	0	0	0	0	0	0	0
chrVII	YGR202C	PCT1	133	3		1	1	0	0	0	0	0	0	0	0
chrVII	YGR203W	YCH1	189	8		1	1	0	0	1	0	0	0	0	0
chrVII	YGR204W	ADE3	104	14		1	0	3	1	0	0	0	0	0	0
chrVII	YGR205W	TDA10	219	19		4	2	1	2	0	0	0	0	0	0
chrVII	YGR207C	CIR1	130	7		0	0	1	1	0	0	0	0	0	0
chrVII	YGR208W	SER2	114	6		4	1	0	0	0	0	0	0	0	0
chrVII	YGR209C	TRX2	90	5		0	0	0	0	1	0	0	0	0	0
chrVII	YGR210C		209	13		2	4	1	0	0	0	0	0	0	0
chrVII	YGR211W	ZPR1	199	5		1	0	0	1	0	0	0	0	0	0
chrVII	YGR214W	RPS0A	133	9		6	0	1	0	0	0	0	0	0	0
chrVII	YGR215W	RSM27	168	12		1	1	3	0	0	0	0	0	0	0
chrVII	YGR216C	GPI1	141	12		2	0	2	1	0	0	0	0	0	0
chrVII	YGR218W	CRM1	227	12		5	0	1	1	0	0	0	0	0	0
chrVII	YGR220C	MRPL9	83	5		1	0	0	1	0	0	0	0	0	0
chrVII	YGR221C	TOS2	78	8		1	0	0	0	0	0	1	0	0	0
chrVII	YGR222W	PET54	119	5		1	0	0	1	0	0	0	0	0	0
chrVII	YGR223C	HSV2	86	7		0	2	1	0	0	0	0	0	0	0
chrVII	YGR227W	DIE2	305	16		5	2	0	0	0	0	1	0	0	0
chrVII	YGR229C	SMI1	201	9		0	1	0	0	0	0	1	0	0	0
chrVII	YGR230W	BNS1	166	12		4	2	0	1	0	0	0	0	0	0
chrVII	YGR231C	PHB2	236	11		4	0	1	1	0	0	0	0	0	0
chrVII	YGR232W	NAS6	73	13		3	2	2	0	0	0	0	0	0	0
chrVII	YGR233C	PHO81	71	6		1	1	1	0	0	0	0	0	0	0
chrVII	YGR234W	YHB1	292	10		7	0	1	0	0	0	0	0	0	0
chrVII	YGR235C	MOS2	250	13		7	3	0	0	0	0	0	0	0	0
chrVII	YGR237C		176	7		2	0	0	0	1	0	0	0	0	0
chrVII	YGR238C	KEL2	121	10		2	0	1	0	1	0	0	0	0	0
chrVII	YGR239C	PEX21	152	14		5	1	1	1	0	0	0	0	0	0
chrVII	YGR240C	PFK1	236	10		4	3	0	0	0	0	0	0	0	0
chrVII	YGR241C	YAP1802	168	8		6	1	0	0	0	0	0	0	0	0
chrVII	YGR245C	SDA1	256	12		6	0	0	0	0	1	0	0	0	0
chrVII	YGR246C	BRF1	165	2		0	1	0	0	0	0	0	0	0	0
chrVII	YGR248W	SOL4	102	5		0	0	0	0	1	0	0	0	0	0
chrVII	YGR251W	NOP19	400	22		7	2	2	0	1	0	0	0	0	0
chrVII	YGR252W	GCN5	208	3		1	1	0	0	0	0	0	0	0	0
chrVII	YGR253C	PUP2	313	15		3	1	2	1	0	0	0	0	0	0
chrVII	YGR254W	ENO1	147	3		3	0	0	0	0	0	0	0	0	0
chrVII	YGR255C	COQ6	139	8		6	1	0	0	0	0	0	0	0	0
chrVII	YGR257C	MTM1	100	7		3	2	0	0	0	0	0	0	0	0
chrVII	YGR258C	RAD2	61	6		0	1	0	1	0	0	0	0	0	0
chrVII	YGR260W	TNA1	122	2		2	0	0	0	0	0	0	0	0	0
chrVII	YGR261C	APL6	124	7		3	2	0	0	0	0	0	0	0	0
chrVII	YGR262C	BUD32	122	6		1	1	1	0	0	0	0	0	0	0
chrVII	YGR263C	SAY1	85	7		2	1	1	0	0	0	0	0	0	0
chrVII	YGR264C	MES1	201	3		3	0	0	0	0	0	0	0	0	0
chrVII	YGR266W		231	8		4	0	0	1	0	0	0	0	0	0
chrVII	YGR267C	FOL2	337	14		5	2	0	0	1	0	0	0	0	0
chrVII	YGR268C	HUA1	280	7		5	1	0	0	0	0	0	0	0	0
chrVII	YGR270W	YTA7	107	14		4	1	0	2	0	0	0	0	0	0
chrVII	YGR271W	SLH1	141	7		1	1	0	1	0	0	0	0	0	0
chrVII	YGR271C-A	EFG1	119	8		4	2	0	0	0	0	0	0	0	0
chrVII	YGR275W	RTT102	122	9		1	2	0	1	0	0	0	0	0	0
chrVII	YGR277C	CAB4	109	18		3	3	3	0	0	0	0	0	0	0
chrVII	YGR279C	SCW4	378	14		6	0	0	2	0	0	0	0	0	0
chrVII	YGR280C	PXR1	234	6		4	1	0	0	0	0	0	0	0	0
chrVII	YGR281W	YOR1	187	6		4	1	0	0	0	0	0	0	0	0
chrVII	YGR282C	BGL2	273	10		2	2	0	1	0	0	0	0	0	0
chrVII	YGR283C		106	4		2	1	0	0	0	0	0	0	0	0
chrVII	YGR284C	ERV29	233	11		3	2	0	1	0	0	0	0	0	0
chrVII	YGR285C	ZUO1	115	10		3	2	1	0	0	0	0	0	0	0
chrVII	YGR286C	BIO2	163	14		3	0	0	0	1	1	0	0	0	0
chrVIII	YHL048W	COS8	386	17		5	2	1	0	1	0	0	0	0	0
chrVIII	YHL047C	ARN2	353	19		4	3	0	1	1	0	0	0	0	0
chrVIII	YHL040C	ARN1	289	5		3	1	0	0	0	0	0	0	0	0
chrVIII	YHL039W	EFM1	68	2		0	1	0	0	0	0	0	0	0	0
chrVIII	YHL036W	MUP3	103	7		3	2	0	0	0	0	0	0	0	0
chrVIII	YHL035C	VMR1	217	12		4	2	0	1	0	0	0	0	0	0
chrVIII	YHL034C	SBP1	152	2		2	0	0	0	0	0	0	0	0	0
chrVIII	YHL033C	RPL8A	392	11		3	2	0	1	0	0	0	0	0	0
chrVIII	YHL032C	GUT1	62	4		0	0	0	1	0	0	0	0	0	0
chrVIII	YHL031C	GOS1	66	4		2	1	0	0	0	0	0	0	0	0
chrVIII	YHL030W	ECM29	109	5		5	0	0	0	0	0	0	0	0	0
chrVIII	YHL027W	RIM101	211	7		1	0	0	0	0	1	0	0	0	0
chrVIII	YHL025W	SNF6	112	6		2	2	0	0	0	0	0	0	0	0
chrVIII	YHL021C	AIM17	131	15		5	0	2	1	0	0	0	0	0	0
chrVIII	YHL019C	APM2	104	2		2	0	0	0	0	0	0	0	0	0
chrVIII	YHL017W		149	16		3	3	0	0	0	0	1	0	0	0
chrVIII	YHL015W	RPS20	300	6		1	0	0	0	1	0	0	0	0	0
chrVIII	YHL011C	PRS3	221	7		0	1	0	0	1	0	0	0	0	0
chrVIII	YHL009C	YAP3	374	16		5	4	1	0	0	0	0	0	0	0
chrVIII	YHL007C	STE20	262	11		5	3	0	0	0	0	0	0	0	0
chrVIII	YHL006C	SHU1	359	6		2	0	0	1	0	0	0	0	0	0
chrVIII	YHL004W	MRP4	173	6		4	1	0	0	0	0	0	0	0	0
chrVIII	YHL003C	LAG1	255	8		5	0	1	0	0	0	0	0	0	0
chrVIII	YHL002W	HSE1	96	9		1	1	2	0	0	0	0	0	0	0
chrVIII	YHL001W	RPL14B	125	10		1	1	0	0	0	0	1	0	0	0
chrVIII	YHR001W	OSH7	245	15		6	1	1	1	0	0	0	0	0	0
chrVIII	YHR001W-A	QCR10	213	6		4	1	0	0	0	0	0	0	0	0
chrVIII	YHR002W	LEU5	166	8		4	2	0	0	0	0	0	0	0	0
chrVIII	YHR003C	TCD1	158	8		5	0	1	0	0	0	0	0	0	0
chrVIII	YHR005C	GPA1	103	5		0	0	0	0	1	0	0	0	0	0
chrVIII	YHR005C-A	TIM10	138	3		1	1	0	0	0	0	0	0	0	0
chrVIII	YHR006W	STP2	139	8		3	1	1	0	0	0	0	0	0	0
chrVIII	YHR007C	ERG11	299	7		1	0	2	0	0	0	0	0	0	0
chrVIII	YHR008C	SOD2	229	10		6	2	0	0	0	0	0	0	0	0
chrVIII	YHR009C	TDA3	138	4		2	1	0	0	0	0	0	0	0	0
chrVIII	YHR010W	RPL27A	163	8		2	1	0	1	0	0	0	0	0	0
chrVIII	YHR011W	DIA4	247	13		3	1	0	0	0	0	0	1	0	0
chrVIII	YHR012W	VPS29	351	20		5	4	1	1	0	0	0	0	0	0
chrVIII	YHR013C	ARD1	144	8		2	0	2	0	0	0	0	0	0	0
chrVIII	YHR016C	YSC84	137	4		0	2	0	0	0	0	0	0	0	0
chrVIII	YHR017W	YSC83	112	7		2	1	1	0	0	0	0	0	0	0
chrVIII	YHR018C	ARG4	176	10		0	0	0	0	2	0	0	0	0	0
chrVIII	YHR019C	DED81	106	7		0	2	1	0	0	0	0	0	0	0
chrVIII	YHR020W		103	6		4	1	0	0	0	0	0	0	0	0
chrVIII	YHR021C	RPS27B	126	9		3	3	0	0	0	0	0	0	0	0
chrVIII	YHR024C	MAS2	246	14		3	2	1	1	0	0	0	0	0	0
chrVIII	YHR025W	THR1	98	9		0	0	0	0	0	0	0	0	1	0
chrVIII	YHR026W	VMA16	230	14		6	1	2	0	0	0	0	0	0	0
chrVIII	YHR027C	RPN1	147	9		0	1	1	1	0	0	0	0	0	0
chrVIII	YHR028C	DAP2	374	6		4	1	0	0	0	0	0	0	0	0
chrVIII	YHR030C	SLT2	213	19		10	3	1	0	0	0	0	0	0	0
chrVIII	YHR033W		359	12		6	3	0	0	0	0	0	0	0	0
chrVIII	YHR036W	BRL1	323	18		11	2	1	0	0	0	0	0	0	0
chrVIII	YHR037W	PUT2	177	5		3	1	0	0	0	0	0	0	0	0
chrVIII	YHR038W	RRF1	108	8		0	1	2	0	0	0	0	0	0	0
chrVIII	YHR039C	MSC7	137	14		1	4	0	0	1	0	0	0	0	0
chrVIII	YHR039C-A	VMA10	129	6		1	1	1	0	0	0	0	0	0	0
chrVIII	YHR041C	SRB2	229	23		5	1	4	1	0	0	0	0	0	0
chrVIII	YHR042W	NCP1	243	12		8	2	0	0	0	0	0	0	0	0
chrVIII	YHR043C	DOG2	92	8		0	0	0	0	0	0	0	1	0	0
chrVIII	YHR046C	INM1	248	9		5	0	0	1	0	0	0	0	0	0
chrVIII	YHR047C	AAP1	240	13		3	3	0	1	0	0	0	0	0	0
chrVIII	YHR049W	FSH1	139	8		0	0	0	0	0	0	0	1	0	0
chrVIII	YHR050W	SMF2	67	7		1	1	0	1	0	0	0	0	0	0
chrVIII	YHR051W	COX6	289	4		2	1	0	0	0	0	0	0	0	0
chrVIII	YHR052W	CIC1	153	6		2	0	0	1	0	0	0	0	0	0
chrVIII	YHR057C	CPR2	133	11		4	0	1	1	0	0	0	0	0	0
chrVIII	YHR059W	FYV4	104	2		0	1	0	0	0	0	0	0	0	0
chrVIII	YHR061C	GIC1	274	13		6	0	1	1	0	0	0	0	0	0
chrVIII	YHR062C	RPP1	122	18		4	0	0	1	2	0	0	0	0	0
chrVIII	YHR063C	PAN5	125	6		4	1	0	0	0	0	0	0	0	0
chrVIII	YHR064C	SSZ1	289	12		5	2	1	0	0	0	0	0	0	0
chrVIII	YHR065C	RRP3	222	6		1	0	0	0	1	0	0	0	0	0
chrVIII	YHR066W	SSF1	181	10		4	3	0	0	0	0	0	0	0	0
chrVIII	YHR068W	DYS1	301	14		5	1	0	0	0	0	1	0	0	0
chrVIII	YHR069C	RRP4	193	9		2	0	0	0	0	0	1	0	0	0
chrVIII	YHR070W	TRM5	398	8		4	2	0	0	0	0	0	0	0	0
chrVIII	YHR072W	ERG7	125	8		5	0	1	0	0	0	0	0	0	0
chrVIII	YHR072W-A	NOP10	157	2		2	0	0	0	0	0	0	0	0	0
chrVIII	YHR073W	OSH3	196	12		5	2	1	0	0	0	0	0	0	0
chrVIII	YHR074W	QNS1	160	12		2	1	1	0	1	0	0	0	0	0
chrVIII	YHR076W	PTC7	192	18		9	2	0	0	1	0	0	0	0	0
chrVIII	YHR077C	NMD2	190	16		6	0	2	1	0	0	0	0	0	0
chrVIII	YHR078W		201	13		2	0	2	0	1	0	0	0	0	0
chrVIII	YHR079C	IRE1	231	6		0	0	2	0	0	0	0	0	0	0
chrVIII	YHR081W	LRP1	222	9		5	0	0	1	0	0	0	0	0	0
chrVIII	YHR082C	KSP1	269	7		4	0	1	0	0	0	0	0	0	0
chrVIII	YHR083W	SAM35	106	8		3	1	1	0	0	0	0	0	0	0
chrVIII	YHR084W	STE12	328	8		8	0	0	0	0	0	0	0	0	0
chrVIII	YHR086W	NAM8	366	34		15	2	2	1	1	0	0	0	0	0
chrVIII	YHR088W	RPF1	114	9		3	3	0	0	0	0	0	0	0	0
chrVIII	YHR089C	GAR1	322	14		5	2	0	0	1	0	0	0	0	0
chrVIII	YHR092C	HXT4	65	2		2	0	0	0	0	0	0	0	0	0
chrVIII	YHR094C	HXT1	134	10		2	2	0	1	0	0	0	0	0	0
chrVIII	YHR097C		176	11		5	1	0	1	0	0	0	0	0	0
chrVIII	YHR098C	SFB3	148	4		4	0	0	0	0	0	0	0	0	0
chrVIII	YHR100C	GEP4	288	9		5	2	0	0	0	0	0	0	0	0
chrVIII	YHR101C	BIG1	301	19		9	1	0	2	0	0	0	0	0	0
chrVIII	YHR103W	SBE22	196	4		4	0	0	0	0	0	0	0	0	0
chrVIII	YHR104W	GRE3	187	4		2	1	0	0	0	0	0	0	0	0
chrVIII	YHR107C	CDC12	188	11		6	1	1	0	0	0	0	0	0	0
chrVIII	YHR108W	GGA2	140	17		1	2	1	1	1	0	0	0	0	0
chrVIII	YHR110W	ERP5	173	10		4	3	0	0	0	0	0	0	0	0
chrVIII	YHR112C		296	13		4	1	1	1	0	0	0	0	0	0
chrVIII	YHR113W	APE4	219	24		6	3	2	0	0	1	0	0	0	0
chrVIII	YHR115C	DMA1	126	4		2	1	0	0	0	0	0	0	0	0
chrVIII	YHR116W	COX23	264	6		4	1	0	0	0	0	0	0	0	0
chrVIII	YHR117W	TOM71	213	8		4	0	0	1	0	0	0	0	0	0
chrVIII	YHR118C	ORC6	400	13		6	2	1	0	0	0	0	0	0	0
chrVIII	YHR119W	SET1	141	7		2	1	1	0	0	0	0	0	0	0
chrVIII	YHR120W	MSH1	82	3		3	0	0	0	0	0	0	0	0	0
chrVIII	YHR121W	LSM12	97	8		1	0	1	1	0	0	0	0	0	0
chrVIII	YHR122W	CIA2	333	16		2	2	2	1	0	0	0	0	0	0
chrVIII	YHR123W	EPT1	191	12		2	0	0	0	0	0	0	0	0	1
chrVIII	YHR127W		261	8		2	1	0	1	0	0	0	0	0	0
chrVIII	YHR128W	FUR1	273	16		8	0	0	2	0	0	0	0	0	0
chrVIII	YHR131C		385	13		6	2	1	0	0	0	0	0	0	0
chrVIII	YHR132C	ECM14	163	7		2	1	1	0	0	0	0	0	0	0
chrVIII	YHR132W-A	IGO2	294	5		3	1	0	0	0	0	0	0	0	0
chrVIII	YHR133C	NSG1	218	9		4	1	1	0	0	0	0	0	0	0
chrVIII	YHR135C	YCK1	126	4		1	0	1	0	0	0	0	0	0	0
chrVIII	YHR136C	SPL2	96	2		0	1	0	0	0	0	0	0	0	0
chrVIII	YHR137W	ARO9	144	10		6	2	0	0	0	0	0	0	0	0
chrVIII	YHR138C		146	11		5	1	0	1	0	0	0	0	0	0
chrVIII	YHR141C	RPL42B	122	11		5	1	0	1	0	0	0	0	0	0
chrVIII	YHR142W	CHS7	88	4		2	1	0	0	0	0	0	0	0	0
chrVIII	YHR143W	DSE2	267	7		3	0	0	1	0	0	0	0	0	0
chrVIII	YHR143W-A	RPC10	284	7		3	2	0	0	0	0	0	0	0	0
chrVIII	YHR148W	IMP3	399	11		2	0	0	1	1	0	0	0	0	0
chrVIII	YHR149C	SKG6	160	12		7	1	1	0	0	0	0	0	0	0
chrVIII	YHR153C	SPO16	380	12		1	4	1	0	0	0	0	0	0	0
chrVIII	YHR155W	YSP1	380	13		1	2	0	0	0	0	0	1	0	0
chrVIII	YHR159W	TDA11	159	4		2	1	0	0	0	0	0	0	0	0
chrVIII	YHR161C	YAP1801	100	10		3	2	1	0	0	0	0	0	0	0
chrVIII	YHR162W	MPC2	115	2		0	1	0	0	0	0	0	0	0	0
chrVIII	YHR163W	SOL3	141	9		3	1	0	1	0	0	0	0	0	0
chrVIII	YHR164C	DNA2	245	6		2	2	0	0	0	0	0	0	0	0
chrVIII	YHR165C	PRP8	111	11		5	0	2	0	0	0	0	0	0	0
chrVIII	YHR166C	CDC23	121	6		2	2	0	0	0	0	0	0	0	0
chrVIII	YHR169W	DBP8	170	13		5	0	1	0	1	0	0	0	0	0
chrVIII	YHR170W	NMD3	188	11		6	1	1	0	0	0	0	0	0	0
chrVIII	YHR171W	ATG7	123	13		1	3	2	0	0	0	0	0	0	0
chrVIII	YHR174W	ENO2	132	5		3	1	0	0	0	0	0	0	0	0
chrVIII	YHR175W	CTR2	264	12		4	4	0	0	0	0	0	0	0	0
chrVIII	YHR179W	OYE2	132	7		3	0	0	1	0	0	0	0	0	0
chrVIII	YHR181W	SVP26	134	9		1	2	0	1	0	0	0	0	0	0
chrVIII	YHR182W		240	10		1	0	0	1	1	0	0	0	0	0
chrVIII	YHR183W	GND1	170	10		7	0	1	0	0	0	0	0	0	0
chrVIII	YHR186C	KOG1	159	10		2	1	0	0	0	1	0	0	0	0
chrVIII	YHR187W	IKI1	163	12		4	0	0	0	0	0	0	1	0	0
chrVIII	YHR188C	GPI16	127	8		2	1	0	1	0	0	0	0	0	0
chrVIII	YHR190W	ERG9	107	8		0	0	1	0	1	0	0	0	0	0
chrVIII	YHR191C	CTF8	185	14		4	3	0	1	0	0	0	0	0	0
chrVIII	YHR192W	LNP1	184	6		4	1	0	0	0	0	0	0	0	0
chrVIII	YHR193C	EGD2	68	5		0	0	0	0	1	0	0	0	0	0
chrVIII	YHR194W	MDM31	364	12		1	1	0	0	0	0	0	0	1	0
chrVIII	YHR195W	NVJ1	234	10		2	1	0	0	0	1	0	0	0	0
chrVIII	YHR196W	UTP9	74	5		1	2	0	0	0	0	0	0	0	0
chrVIII	YHR197W	RIX1	143	7		4	0	1	0	0	0	0	0	0	0
chrVIII	YHR199C	AIM46	97	10		1	0	0	1	1	0	0	0	0	0
chrVIII	YHR200W	RPN10	264	6		2	0	0	1	0	0	0	0	0	0
chrVIII	YHR201C	PPX1	150	16		3	1	1	0	0	0	0	1	0	0
chrVIII	YHR203C	RPS4B	137	7		0	1	0	0	1	0	0	0	0	0
chrVIII	YHR204W	MNL1	159	5		3	1	0	0	0	0	0	0	0	0
chrVIII	YHR205W	SCH9	219	5		1	2	0	0	0	0	0	0	0	0
chrVIII	YHR206W	SKN7	297	10		4	1	0	1	0	0	0	0	0	0
chrVIII	YHR208W	BAT1	161	9		0	0	0	1	1	0	0	0	0	0
chrVIII	YHR215W	PHO12	65	4		2	1	0	0	0	0	0	0	0	0
chrVIII	YHR216W	IMD2	189	5		2	0	1	0	0	0	0	0	0	0
chrIX	YIL162W	SUC2	219	4		2	1	0	0	0	0	0	0	0	0
chrIX	YIL159W	BNR1	142	7		4	0	1	0	0	0	0	0	0	0
chrIX	YIL157C	COA1	208	5		3	1	0	0	0	0	0	0	0	0
chrIX	YIL156W-B		109	13		1	1	0	0	0	0	0	0	0	1
chrIX	YIL156W	UBP7	241	24		4	5	2	1	0	0	0	0	0	0
chrIX	YIL155C	GUT2	350	6		1	0	0	0	1	0	0	0	0	0
chrIX	YIL154C	IMP2'	289	12		2	0	1	0	0	0	1	0	0	0
chrIX	YIL153W	RRD1	55	4		1	0	1	0	0	0	0	0	0	0
chrIX	YIL150C	MCM10	380	10		5	1	1	0	0	0	0	0	0	0
chrIX	YIL149C	MLP2	153	16		6	0	1	0	0	0	1	0	0	0
chrIX	YIL148W	RPL40A	100	7		2	0	0	0	1	0	0	0	0	0
chrIX	YIL145C	PAN6	106	5		3	1	0	0	0	0	0	0	0	0
chrIX	YIL143C	SSL2	253	6		2	2	0	0	0	0	0	0	0	0
chrIX	YIL142W	CCT2	58	8		0	1	0	0	0	1	0	0	0	0
chrIX	YIL140W	AXL2	131	5		1	2	0	0	0	0	0	0	0	0
chrIX	YIL138C	TPM2	355	6		2	0	0	1	0	0	0	0	0	0
chrIX	YIL137C	TMA108	84	8		2	0	0	0	0	1	0	0	0	0
chrIX	YIL136W	OM45	211	14		5	1	1	1	0	0	0	0	0	0
chrIX	YIL135C	VHS2	161	6		2	2	0	0	0	0	0	0	0	0
chrIX	YIL133C	RPL16A	222	12		5	0	1	1	0	0	0	0	0	0
chrIX	YIL132C	CSM2	399	13		3	1	0	2	0	0	0	0	0	0
chrIX	YIL131C	FKH1	148	6		1	1	1	0	0	0	0	0	0	0
chrIX	YIL129C	TAO3	158	29		3	3	1	1	0	1	1	0	0	0
chrIX	YIL127C	RRT14	166	3		1	1	0	0	0	0	0	0	0	0
chrIX	YIL126W	STH1	139	4		1	0	1	0	0	0	0	0	0	0
chrIX	YIL125W	KGD1	262	12		7	1	1	0	0	0	0	0	0	0
chrIX	YIL124W	AYR1	172	7		5	1	0	0	0	0	0	0	0	0
chrIX	YIL123W	SIM1	339	10		0	1	1	0	1	0	0	0	0	0
chrIX	YIL122W	POG1	156	4		2	1	0	0	0	0	0	0	0	0
chrIX	YIL121W	QDR2	318	13		4	3	1	0	0	0	0	0	0	0
chrIX	YIL119C	RPI1	263	4		1	0	1	0	0	0	0	0	0	0
chrIX	YIL117C	PRM5	128	11		3	4	0	0	0	0	0	0	0	0
chrIX	YIL115C	NUP159	61	6		0	0	0	0	0	1	0	0	0	0
chrIX	YIL112W	HOS4	142	10		3	2	1	0	0	0	0	0	0	0
chrIX	YIL111W	COX5B	126	5		2	0	1	0	0	0	0	0	0	0
chrIX	YIL110W	HPM1	292	9		5	2	0	0	0	0	0	0	0	0
chrIX	YIL109C	SEC24	179	11		2	2	0	0	1	0	0	0	0	0
chrIX	YIL108W		85	13		2	0	1	0	0	0	0	1	0	0
chrIX	YIL106W	MOB1	166	19		1	3	1	1	1	0	0	0	0	0
chrIX	YIL105C	SLM1	325	13		6	2	1	0	0	0	0	0	0	0
chrIX	YIL104C	SHQ1	97	5		1	0	0	1	0	0	0	0	0	0
chrIX	YIL103W	DPH1	114	10		2	0	0	2	0	0	0	0	0	0
chrIX	YIL102C-A		381	12		4	4	0	0	0	0	0	0	0	0
chrIX	YIL098C	FMC1	104	13		0	1	1	0	0	0	0	1	0	0
chrIX	YIL096C	BMT5	190	10		5	1	1	0	0	0	0	0	0	0
chrIX	YIL095W	PRK1	87	7		3	2	0	0	0	0	0	0	0	0
chrIX	YIL094C	LYS12	290	23		15	4	0	0	0	0	0	0	0	0
chrIX	YIL093C	RSM25	137	5		5	0	0	0	0	0	0	0	0	0
chrIX	YIL091C	UTP25	119	7		4	0	1	0	0	0	0	0	0	0
chrIX	YIL090W	ICE2	357	9		5	2	0	0	0	0	0	0	0	0
chrIX	YIL088C	AVT7	110	9		3	0	2	0	0	0	0	0	0	0
chrIX	YIL087C	AIM19	101	7		1	0	2	0	0	0	0	0	0	0
chrIX	YIL085C	KTR7	260	19		7	2	0	2	0	0	0	0	0	0
chrIX	YIL079C	AIR1	132	8		4	2	0	0	0	0	0	0	0	0
chrIX	YIL078W	THS1	88	6		2	2	0	0	0	0	0	0	0	0
chrIX	YIL077C		153	7		2	1	1	0	0	0	0	0	0	0
chrIX	YIL076W	SEC28	184	10		7	0	1	0	0	0	0	0	0	0
chrIX	YIL075C	RPN2	160	11		2	1	0	0	0	0	1	0	0	0
chrIX	YIL074C	SER33	58	4		0	0	0	1	0	0	0	0	0	0
chrIX	YIL070C	MAM33	126	6		2	2	0	0	0	0	0	0	0	0
chrIX	YIL069C	RPS24B	212	10		5	1	1	0	0	0	0	0	0	0
chrIX	YIL068C	SEC6	272	23		7	4	1	0	1	0	0	0	0	0
chrIX	YIL067C		87	11		1	1	0	2	0	0	0	0	0	0
chrIX	YIL065C	FIS1	90	7		2	1	1	0	0	0	0	0	0	0
chrIX	YIL064W	SEE1	95	10		4	1	0	1	0	0	0	0	0	0
chrIX	YIL062C	ARC15	113	5		2	0	1	0	0	0	0	0	0	0
chrIX	YIL061C	SNP1	41	7		2	0	0	0	1	0	0	0	0	0
chrIX	YIL056W	VHR1	130	4		2	1	0	0	0	0	0	0	0	0
chrIX	YIL053W	GPP1	172	8		4	2	0	0	0	0	0	0	0	0
chrIX	YIL052C	RPL34B	119	9		2	1	0	0	1	0	0	0	0	0
chrIX	YIL051C	MMF1	132	5		1	2	0	0	0	0	0	0	0	0
chrIX	YIL050W	PCL7	134	3		3	0	0	0	0	0	0	0	0	0
chrIX	YIL048W	NEO1	219	10		5	1	1	0	0	0	0	0	0	0
chrIX	YIL046W	MET30	150	7		4	0	1	0	0	0	0	0	0	0
chrIX	YIL043C	CBR1	122	9		0	1	0	0	0	0	1	0	0	0
chrIX	YIL041W	GVP36	114	13		1	1	1	0	0	0	1	0	0	0
chrIX	YIL040W	APQ12	97	3		0	0	1	0	0	0	0	0	0	0
chrIX	YIL039W	TED1	155	10		3	1	0	0	1	0	0	0	0	0
chrIX	YIL038C	NOT3	267	8		6	1	0	0	0	0	0	0	0	0
chrIX	YIL036W	CST6	256	18		4	1	0	0	0	0	0	0	0	1
chrIX	YIL035C	CKA1	351	5		1	2	0	0	0	0	0	0	0	0
chrIX	YIL034C	CAP2	93	11		3	2	0	1	0	0	0	0	0	0
chrIX	YIL033C	BCY1	191	10		0	1	0	2	0	0	0	0	0	0
chrIX	YIL031W	ULP2	156	24		3	1	1	1	1	0	1	0	0	0
chrIX	YIL030C	SSM4	86	4		0	0	0	1	0	0	0	0	0	0
chrIX	YIL027C	EMC5	195	30		5	0	0	2	0	0	0	0	0	1
chrIX	YIL026C	IRR1	201	18		4	0	0	1	0	0	0	0	0	1
chrIX	YIL023C	YKE4	146	14		2	2	1	0	1	0	0	0	0	0
chrIX	YIL022W	TIM44	257	7		2	1	1	0	0	0	0	0	0	0
chrIX	YIL021W	RPB3	279	9		4	1	1	0	0	0	0	0	0	0
chrIX	YIL020C	HIS6	137	4		0	2	0	0	0	0	0	0	0	0
chrIX	YIL019W	FAF1	172	5		5	0	0	0	0	0	0	0	0	0
chrIX	YIL018W	RPL2B	95	4		0	2	0	0	0	0	0	0	0	0
chrIX	YIL016W	SNL1	72	9		0	0	0	0	0	0	0	0	1	0
chrIX	YIL015W	BAR1	100	4		2	1	0	0	0	0	0	0	0	0
chrIX	YIL014W	MNT3	215	13		6	2	1	0	0	0	0	0	0	0
chrIX	YIL011W	TIR3	130	15		4	1	0	1	1	0	0	0	0	0
chrIX	YIL010W	DOT5	242	13		3	3	0	1	0	0	0	0	0	0
chrIX	YIL009C-A	EST3	148	12		2	3	0	1	0	0	0	0	0	0
chrIX	YIL008W	URM1	208	12		2	2	2	0	0	0	0	0	0	0
chrIX	YIL005W	EPS1	217	14		3	1	0	1	1	0	0	0	0	0
chrIX	YIL004C	BET1	297	19		7	3	2	0	0	0	0	0	0	0
chrIX	YIL003W	CFD1	115	8		2	1	0	1	0	0	0	0	0	0
chrIX	YIL002W-A		202	18		4	0	3	0	1	0	0	0	0	0
chrIX	YIL002C	INP51	173	17		8	1	1	1	0	0	0	0	0	0
chrIX	YIL001W		67	6		3	0	1	0	0	0	0	0	0	0
chrIX	YIR003W	AIM21	85	4		1	0	1	0	0	0	0	0	0	0
chrIX	YIR006C	PAN1	92	10		2	1	2	0	0	0	0	0	0	0
chrIX	YIR008C	PRI1	381	10		5	1	1	0	0	0	0	0	0	0
chrIX	YIR012W	SQT1	97	12		0	2	1	0	1	0	0	0	0	0
chrIX	YIR021W	MRS1	62	5		0	0	0	0	1	0	0	0	0	0
chrIX	YIR022W	SEC11	133	5		3	1	0	0	0	0	0	0	0	0
chrIX	YIR023W	DAL81	120	21		2	1	1	0	0	1	0	1	0	0
chrIX	YIR024C		200	20		4	3	0	1	0	1	0	0	0	0
chrIX	YIR025W	MND2	145	3		1	1	0	0	0	0	0	0	0	0
chrIX	YIR026C	YVH1	176	8		4	0	0	1	0	0	0	0	0	0
chrIX	YIR031C	DAL7	67	5		1	2	0	0	0	0	0	0	0	0
chrIX	YIR034C	LYS1	162	13		4	0	0	1	1	0	0	0	0	0
chrIX	YIR035C		83	9		0	0	0	1	1	0	0	0	0	0
chrIX	YIR036C	IRC24	71	4		0	0	0	1	0	0	0	0	0	0
chrIX	YIR037W	HYR1	205	11		4	2	1	0	0	0	0	0	0	0
chrIX	YIR038C	GTT1	171	11		3	0	0	0	0	0	0	1	0	0
chrX	YJL218W		167	6		3	0	1	0	0	0	0	0	0	0
chrX	YJL217W	REE1	113	6		2	0	0	1	0	0	0	0	0	0
chrX	YJL212C	OPT1	303	7		3	2	0	0	0	0	0	0	0	0
chrX	YJL210W	PEX2	99	3		3	0	0	0	0	0	0	0	0	0
chrX	YJL205C	NCE101	160	17		4	0	0	0	0	1	1	0	0	0
chrX	YJL203W	PRP21	286	10		6	2	0	0	0	0	0	0	0	0
chrX	YJL201W	ECM25	147	9		3	3	0	0	0	0	0	0	0	0
chrX	YJL200C	ACO2	181	8		2	1	0	1	0	0	0	0	0	0
chrX	YJL198W	PHO90	130	8		3	1	1	0	0	0	0	0	0	0
chrX	YJL197W	UBP12	113	12		3	0	1	0	0	1	0	0	0	0
chrX	YJL196C	ELO1	141	3		3	0	0	0	0	0	0	0	0	0
chrX	YJL193W		171	15		4	2	1	1	0	0	0	0	0	0
chrX	YJL192C	SOP4	159	8		4	0	0	1	0	0	0	0	0	0
chrX	YJL191W	RPS14B	105	8		0	0	1	0	1	0	0	0	0	0
chrX	YJL190C	RPS22A	160	15		4	2	1	1	0	0	0	0	0	0
chrX	YJL189W	RPL39	145	3		1	1	0	0	0	0	0	0	0	0
chrX	YJL187C	SWE1	185	17		8	3	1	0	0	0	0	0	0	0
chrX	YJL185C	ATG36	318	17		4	2	0	1	1	0	0	0	0	0
chrX	YJL184W	GON7	83	8		1	2	1	0	0	0	0	0	0	0
chrX	YJL183W	MNN11	176	11		5	3	0	0	0	0	0	0	0	0
chrX	YJL179W	PFD1	216	4		2	1	0	0	0	0	0	0	0	0
chrX	YJL178C	ATG27	122	12		0	1	0	0	2	0	0	0	0	0
chrX	YJL177W	RPL17B	133	13		2	2	1	1	0	0	0	0	0	0
chrX	YJL176C	SWI3	235	5		1	0	0	1	0	0	0	0	0	0
chrX	YJL174W	KRE9	313	12		8	2	0	0	0	0	0	0	0	0
chrX	YJL173C	RFA3	171	12		7	0	0	0	1	0	0	0	0	0
chrX	YJL170C	ASG7	43	9		2	1	0	0	1	0	0	0	0	0
chrX	YJL168C	SET2	213	11		3	1	2	0	0	0	0	0	0	0
chrX	YJL167W	ERG20	127	12		3	2	0	0	1	0	0	0	0	0
chrX	YJL166W	QCR8	233	15		2	2	1	0	0	1	0	0	0	0
chrX	YJL165C	HAL5	41	6		1	0	0	0	1	0	0	0	0	0
chrX	YJL164C	TPK1	294	15		7	0	1	0	1	0	0	0	0	0
chrX	YJL163C		165	23		4	0	3	0	0	0	0	0	0	1
chrX	YJL159W	HSP150	319	10		5	1	1	0	0	0	0	0	0	0
chrX	YJL158C	CIS3	261	14		3	2	1	1	0	0	0	0	0	0
chrX	YJL157C	FAR1	164	8		3	1	1	0	0	0	0	0	0	0
chrX	YJL156C	SSY5	394	5		0	1	1	0	0	0	0	0	0	0
chrX	YJL154C	VPS35	194	11		5	3	0	0	0	0	0	0	0	0
chrX	YJL151C	SNA3	73	4		0	0	0	1	0	0	0	0	0	0
chrX	YJL148W	RPA34	228	5		2	0	1	0	0	0	0	0	0	0
chrX	YJL145W	SFH5	113	10		2	2	0	1	0	0	0	0	0	0
chrX	YJL144W		258	6		1	0	0	0	1	0	0	0	0	0
chrX	YJL143W	TIM17	284	6		6	0	0	0	0	0	0	0	0	0
chrX	YJL141C	YAK1	159	4		2	1	0	0	0	0	0	0	0	0
chrX	YJL140W	RPB4	138	6		2	2	0	0	0	0	0	0	0	0
chrX	YJL139C	YUR1	130	3		1	1	0	0	0	0	0	0	0	0
chrX	YJL138C	TIF2	233	9		1	2	0	1	0	0	0	0	0	0
chrX	YJL137C	GLG2	308	9		6	0	1	0	0	0	0	0	0	0
chrX	YJL136C	RPS21B	161	4		2	1	0	0	0	0	0	0	0	0
chrX	YJL133C-A		179	6		1	1	1	0	0	0	0	0	0	0
chrX	YJL130C	URA2	117	13		3	2	2	0	0	0	0	0	0	0
chrX	YJL128C	PBS2	150	5		1	0	0	1	0	0	0	0	0	0
chrX	YJL127C-B		256	11		4	1	0	0	1	0	0	0	0	0
chrX	YJL126W	NIT2	142	7		3	0	0	1	0	0	0	0	0	0
chrX	YJL125C	GCD14	134	6		4	1	0	0	0	0	0	0	0	0
chrX	YJL124C	LSM1	316	18		3	0	2	1	1	0	0	0	0	0
chrX	YJL123C	MTC1	109	8		4	2	0	0	0	0	0	0	0	0
chrX	YJL122W	ALB1	160	24		6	1	0	1	1	0	1	0	0	0
chrX	YJL121C	RPE1	260	23		7	1	0	2	0	1	0	0	0	0
chrX	YJL115W	ASF1	144	11		0	1	3	0	0	0	0	0	0	0
chrX	YJL112W	MDV1	172	9		1	0	1	0	1	0	0	0	0	0
chrX	YJL111W	CCT7	171	6		2	2	0	0	0	0	0	0	0	0
chrX	YJL110C	GZF3	195	9		2	2	1	0	0	0	0	0	0	0
chrX	YJL109C	UTP10	64	4		0	2	0	0	0	0	0	0	0	0
chrX	YJL104W	PAM16	181	7		2	0	0	0	1	0	0	0	0	0
chrX	YJL102W	MEF2	373	6		6	0	0	0	0	0	0	0	0	0
chrX	YJL101C	GSH1	255	11		4	2	1	0	0	0	0	0	0	0
chrX	YJL097W	PHS1	138	13		6	2	1	0	0	0	0	0	0	0
chrX	YJL096W	MRPL49	90	7		3	2	0	0	0	0	0	0	0	0
chrX	YJL095W	BCK1	88	5		0	0	0	0	1	0	0	0	0	0
chrX	YJL094C	KHA1	150	8		0	0	1	0	1	0	0	0	0	0
chrX	YJL092W	SRS2	163	16		1	0	0	0	0	1	0	0	1	0
chrX	YJL091C	GWT1	381	9		7	1	0	0	0	0	0	0	0	0
chrX	YJL085W	EXO70	208	10		4	1	0	1	0	0	0	0	0	0
chrX	YJL082W	IML2	218	2		2	0	0	0	0	0	0	0	0	0
chrX	YJL081C	ARP4	316	25		8	3	1	2	0	0	0	0	0	0
chrX	YJL080C	SCP160	120	6		1	1	1	0	0	0	0	0	0	0
chrX	YJL079C	PRY1	184	4		2	1	0	0	0	0	0	0	0	0
chrX	YJL078C	PRY3	359	9		3	1	0	1	0	0	0	0	0	0
chrX	YJL077W-B		220	8		5	0	1	0	0	0	0	0	0	0
chrX	YJL077W-A		200	9		2	0	0	0	0	0	1	0	0	0
chrX	YJL076W	NET1	228	22		5	1	1	1	0	0	0	1	0	0
chrX	YJL073W	JEM1	104	4		2	1	0	0	0	0	0	0	0	0
chrX	YJL072C	PSF2	185	10		8	1	0	0	0	0	0	0	0	0
chrX	YJL068C		119	5		3	1	0	0	0	0	0	0	0	0
chrX	YJL066C	MPM1	219	3		3	0	0	0	0	0	0	0	0	0
chrX	YJL063C	MRPL8	77	3		1	1	0	0	0	0	0	0	0	0
chrX	YJL062W-A	COA3	197	10		2	1	0	0	0	1	0	0	0	0
chrX	YJL061W	NUP82	276	9		7	1	0	0	0	0	0	0	0	0
chrX	YJL060W	BNA3	128	18		2	1	3	0	1	0	0	0	0	0
chrX	YJL059W	YHC3	98	8		2	1	0	1	0	0	0	0	0	0
chrX	YJL057C	IKS1	89	5		2	0	1	0	0	0	0	0	0	0
chrX	YJL055W		79	7		3	2	0	0	0	0	0	0	0	0
chrX	YJL054W	TIM54	164	17		3	1	0	0	1	0	1	0	0	0
chrX	YJL053W	PEP8	205	3		3	0	0	0	0	0	0	0	0	0
chrX	YJL052W	TDH1	149	10		4	3	0	0	0	0	0	0	0	0
chrX	YJL051W	IRC8	209	2		2	0	0	0	0	0	0	0	0	0
chrX	YJL050W	MTR4	66	6		2	0	0	1	0	0	0	0	0	0
chrX	YJL048C	UBX6	154	7		2	0	0	0	1	0	0	0	0	0
chrX	YJL047C-A		398	19		5	0	1	0	1	1	0	0	0	0
chrX	YJL047C	RTT101	342	8		3	1	1	0	0	0	0	0	0	0
chrX	YJL046W	AIM22	290	8		5	0	1	0	0	0	0	0	0	0
chrX	YJL045W		242	13		6	2	1	0	0	0	0	0	0	0
chrX	YJL044C	GYP6	392	6		1	1	1	0	0	0	0	0	0	0
chrX	YJL041W	NSP1	134	8		4	2	0	0	0	0	0	0	0	0
chrX	YJL039C	NUP192	376	12		2	2	2	0	0	0	0	0	0	0
chrX	YJL036W	SNX4	207	7		2	1	1	0	0	0	0	0	0	0
chrX	YJL034W	KAR2	272	21		12	2	0	0	1	0	0	0	0	0
chrX	YJL031C	BET4	115	6		0	3	0	0	0	0	0	0	0	0
chrX	YJL030W	MAD2	209	4		4	0	0	0	0	0	0	0	0	0
chrX	YJL026W	RNR2	159	6		6	0	0	0	0	0	0	0	0	0
chrX	YJL024C	APS3	384	13		8	1	1	0	0	0	0	0	0	0
chrX	YJL023C	PET130	157	15		6	0	1	0	0	1	0	0	0	0
chrX	YJL014W	CCT3	188	10		6	0	0	1	0	0	0	0	0	0
chrX	YJL012C	VTC4	104	6		2	2	0	0	0	0	0	0	0	0
chrX	YJL011C	RPC17	282	9		7	1	0	0	0	0	0	0	0	0
chrX	YJL008C	CCT8	234	15		4	4	1	0	0	0	0	0	0	0
chrX	YJL006C	CTK2	57	10		1	0	0	1	1	0	0	0	0	0
chrX	YJL005W	CYR1	163	7		2	1	1	0	0	0	0	0	0	0
chrX	YJL004C	SYS1	294	16		5	1	3	0	0	0	0	0	0	0
chrX	YJL003W	COX16	278	11		3	2	0	1	0	0	0	0	0	0
chrX	YJL002C	OST1	173	17		1	2	0	3	0	0	0	0	0	0
chrX	YJL001W	PRE3	120	6		1	0	0	0	1	0	0	0	0	0
chrX	YJR001W	AVT1	134	11		2	0	0	1	1	0	0	0	0	0
chrX	YJR002W	MPP10	385	19		9	3	0	1	0	0	0	0	0	0
chrX	YJR003C		349	7		4	0	1	0	0	0	0	0	0	0
chrX	YJR006W	POL31	103	14		2	2	1	0	1	0	0	0	0	0
chrX	YJR007W	SUI2	156	12		4	0	1	0	1	0	0	0	0	0
chrX	YJR009C	TDH2	137	4		2	1	0	0	0	0	0	0	0	0
chrX	YJR011C		173	18		5	0	2	0	0	0	1	0	0	0
chrX	YJR012C		129	10		1	3	1	0	0	0	0	0	0	0
chrX	YJR014W	TMA22	350	8		1	2	1	0	0	0	0	0	0	0
chrX	YJR016C	ILV3	168	12		6	1	0	1	0	0	0	0	0	0
chrX	YJR017C	ESS1	242	4		0	0	0	1	0	0	0	0	0	0
chrX	YJR021C	REC107	96	4		0	0	0	1	0	0	0	0	0	0
chrX	YJR025C	BNA1	152	6		2	0	0	1	0	0	0	0	0	0
chrX	YJR031C	GEA1	136	6		0	0	0	0	0	1	0	0	0	0
chrX	YJR034W	PET191	161	7		2	1	1	0	0	0	0	0	0	0
chrX	YJR036C	HUL4	121	15		6	0	0	1	1	0	0	0	0	0
chrX	YJR041C	URB2	286	23		5	4	2	1	0	0	0	0	0	0
chrX	YJR042W	NUP85	127	10		2	0	0	2	0	0	0	0	0	0
chrX	YJR044C	VPS55	177	5		2	0	1	0	0	0	0	0	0	0
chrX	YJR045C	SSC1	254	8		2	1	0	1	0	0	0	0	0	0
chrX	YJR048W	CYC1	173	2		2	0	0	0	0	0	0	0	0	0
chrX	YJR049C	UTR1	201	9		3	3	0	0	0	0	0	0	0	0
chrX	YJR050W	ISY1	298	7		2	0	0	0	1	0	0	0	0	0
chrX	YJR051W	OSM1	116	23		3	0	2	1	0	0	0	0	0	1
chrX	YJR052W	RAD7	69	7		0	0	0	0	0	0	1	0	0	0
chrX	YJR054W	KCH1	345	17		5	4	0	1	0	0	0	0	0	0
chrX	YJR056C		170	12		5	2	1	0	0	0	0	0	0	0
chrX	YJR057W	CDC8	155	7		5	1	0	0	0	0	0	0	0	0
chrX	YJR058C	APS2	59	3		1	1	0	0	0	0	0	0	0	0
chrX	YJR059W	PTK2	209	13		5	1	2	0	0	0	0	0	0	0
chrX	YJR062C	NTA1	345	21		6	2	2	0	1	0	0	0	0	0
chrX	YJR063W	RPA12	205	13		1	1	0	0	0	0	0	0	0	1
chrX	YJR064W	CCT5	61	7		1	0	0	0	0	1	0	0	0	0
chrX	YJR065C	ARP3	299	11		5	3	0	0	0	0	0	0	0	0
chrX	YJR069C	HAM1	210	10		4	1	0	1	0	0	0	0	0	0
chrX	YJR070C	LIA1	128	7		1	1	0	1	0	0	0	0	0	0
chrX	YJR072C	NPA3	336	17		5	3	2	0	0	0	0	0	0	0
chrX	YJR073C	OPI3	128	13		3	1	1	0	1	0	0	0	0	0
chrX	YJR074W	MOG1	285	18		2	3	0	0	2	0	0	0	0	0
chrX	YJR075W	HOC1	198	3		3	0	0	0	0	0	0	0	0	0
chrX	YJR077C	MIR1	251	7		1	1	0	1	0	0	0	0	0	0
chrX	YJR078W	BNA2	217	2		2	0	0	0	0	0	0	0	0	0
chrX	YJR082C	EAF6	263	13		7	1	0	1	0	0	0	0	0	0
chrX	YJR083C	ACF4	98	5		1	0	0	1	0	0	0	0	0	0
chrX	YJR084W		166	11		2	1	1	1	0	0	0	0	0	0
chrX	YJR086W	STE18	58	5		0	0	0	0	1	0	0	0	0	0
[truncated: 1,775 more rows]
