# Supplementary figures and images for: Nucleotide-level linkage of transcriptional elongation and polyadenylation
Source: eLife journal article supplement (doi:10.7554/elife.83153), 2022-11-24

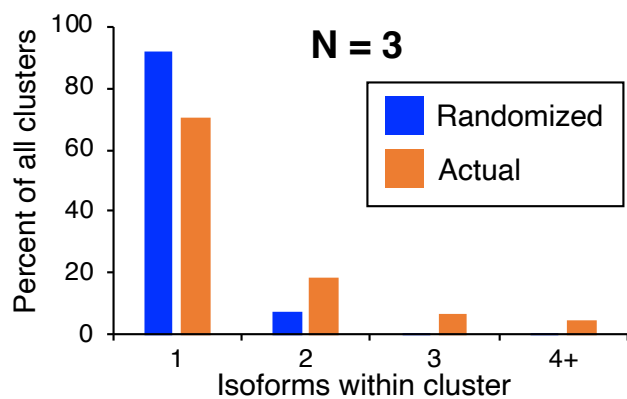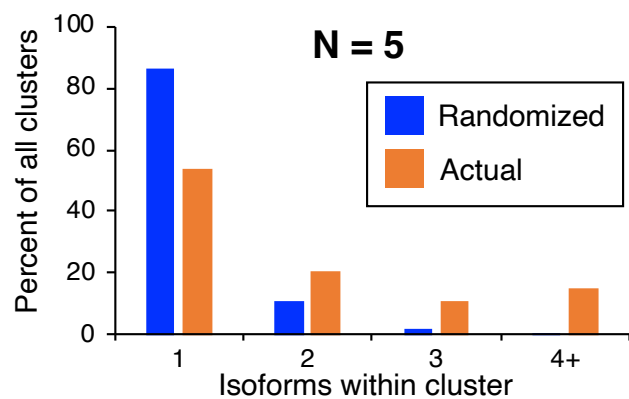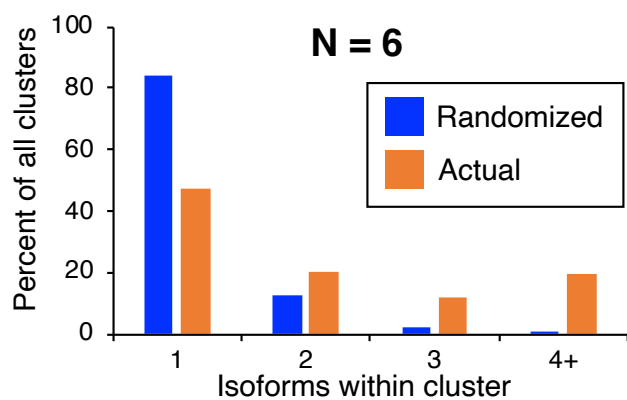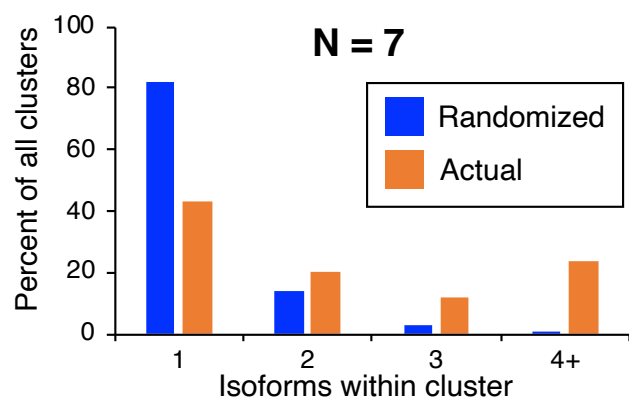

**Figure 1 - figure supplement 1**

Supplement: supp [file elife-83153-supp-v1.zip]

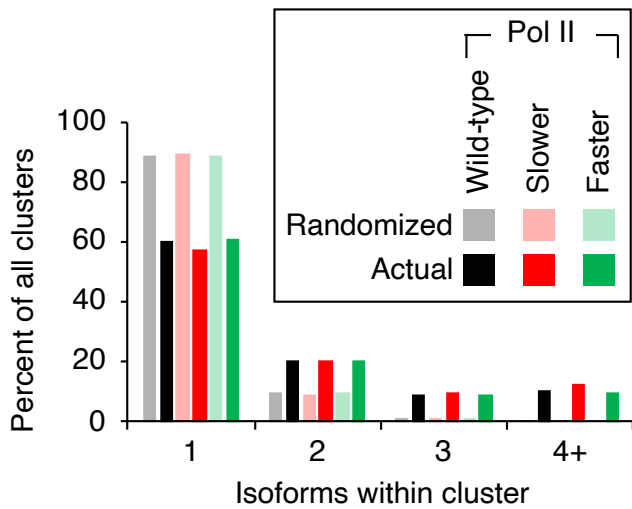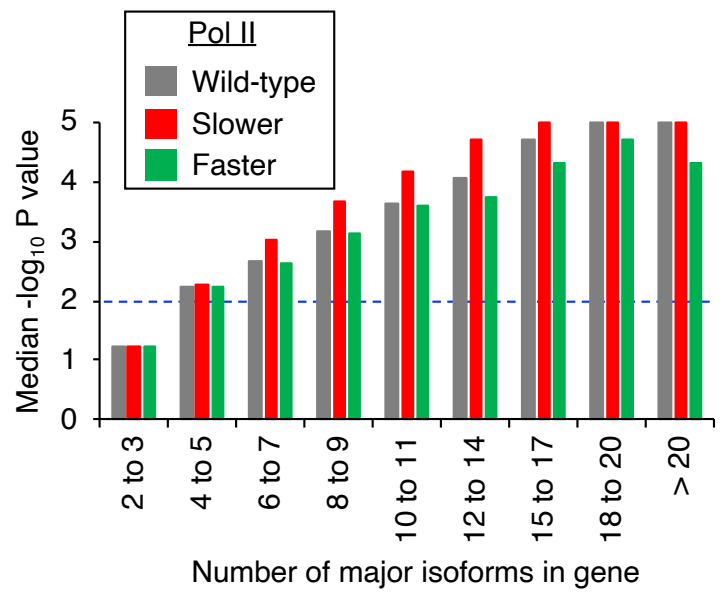

**Figure 1 - figure supplement 2**

Supplement: supp [file elife-83153-supp-v1.zip]

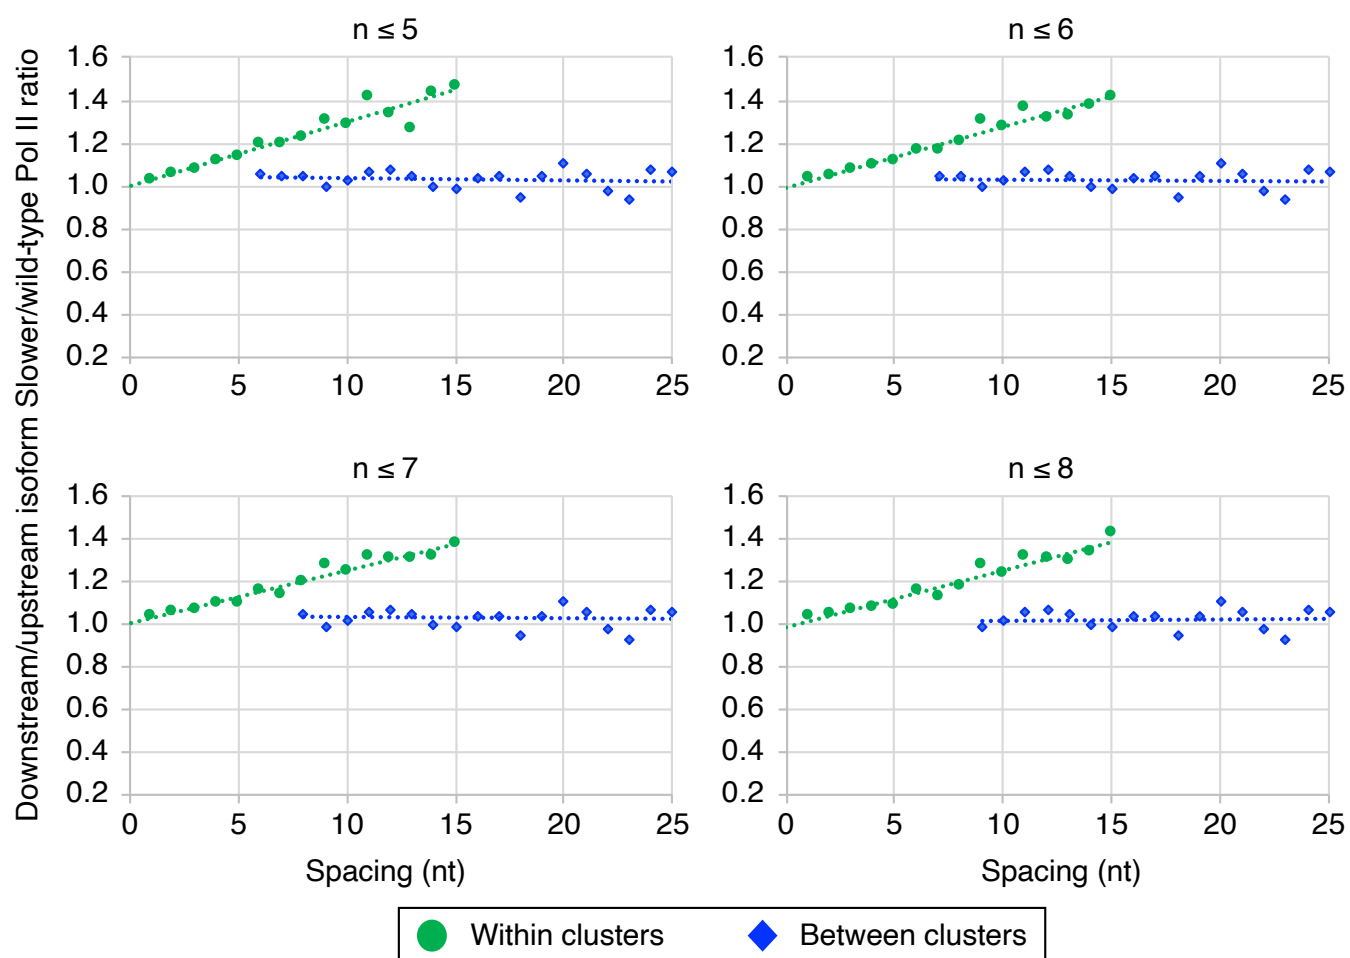

**Figure 3 - figure supplement 1**

Supplement: supp [file elife-83153-supp-v1.zip]

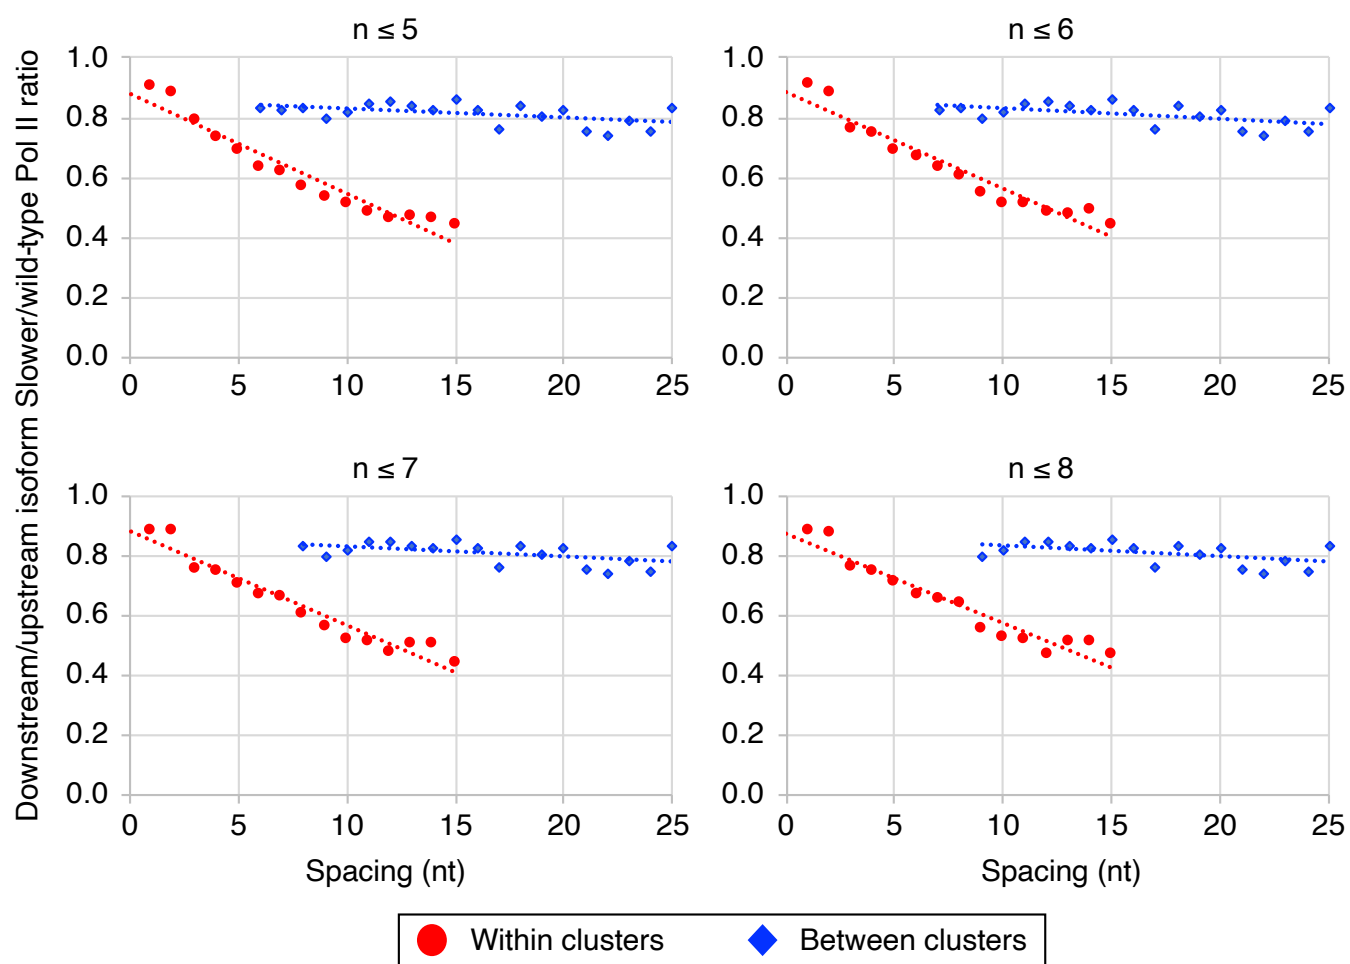

Figure 2 - figure supplement 1

Supplement: supp [file elife-83153-supp-v1.zip]

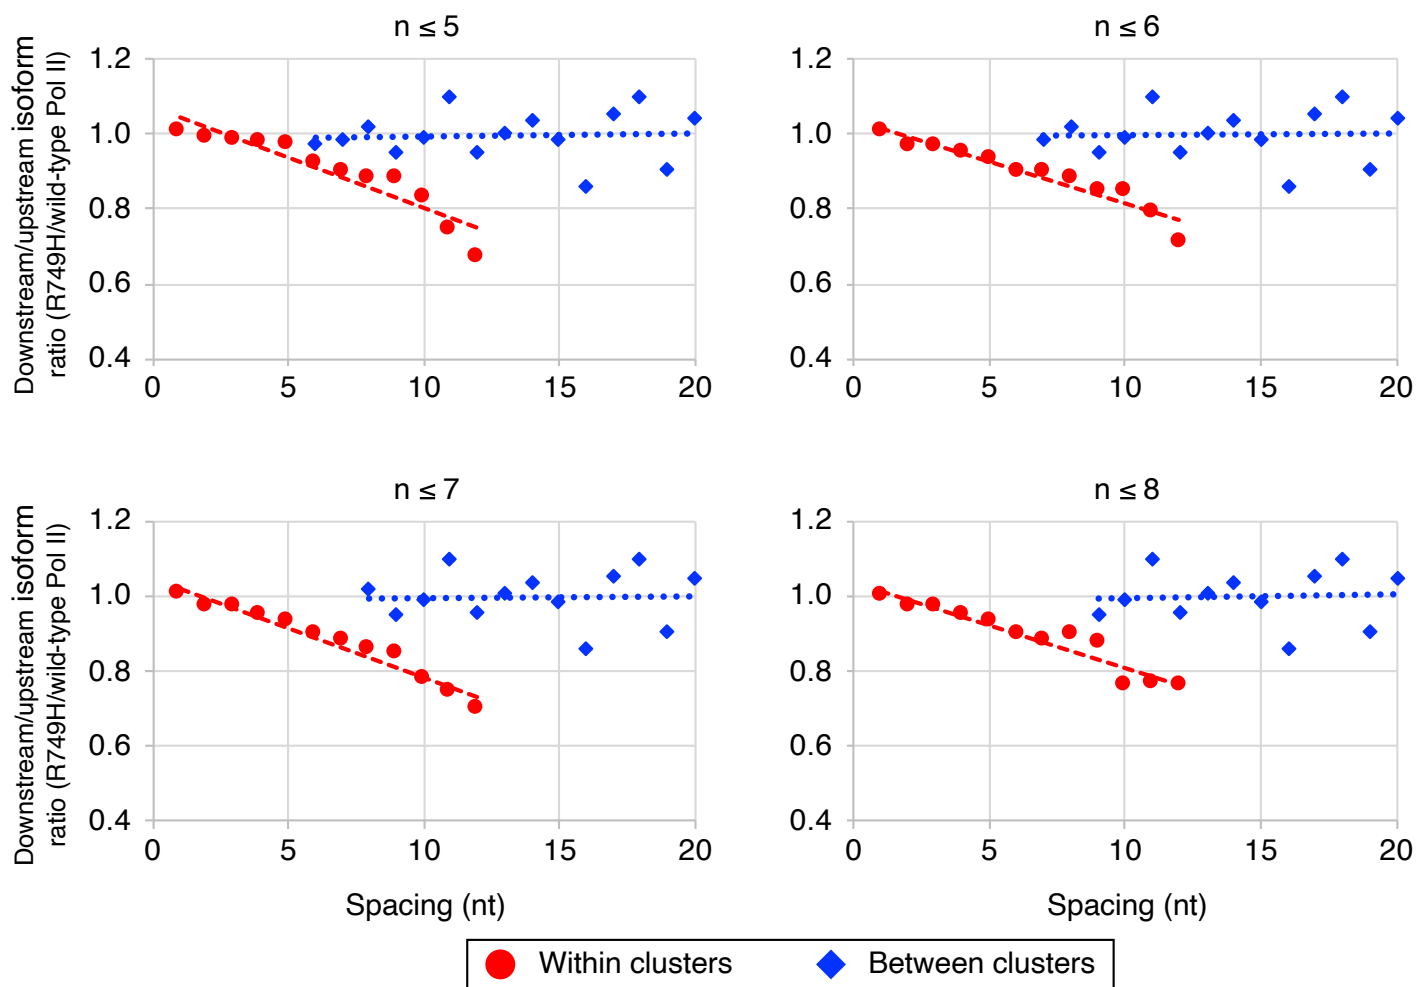

Figure 4 - figure supplement 2

Supplement: supp [file elife-83153-supp-v1.zip]
